# Supplementary material for: Discovery of 2,3-dihydro-1H-pyrrolo[3,4-b]quinolin-1-one derivatives as possible antileishmanial agents
Source: Royal Society of Chemistry journal article supplement (doi:10.1039/d2md00078d), 2022-01-01
Supplement: d2md00078d1.pdf [file d2md00078d1.pdf]

## Electronic Supplementary Information

### **Discovery of 2,3-dihydro-1*H*-pyrrolo[3,4-*b*]quinolin-1-one derivatives as possible anti-leishmanial agents**

Anuradha Seth,<sup>b,d,†</sup> Anirban Ghoshal,<sup>a,d,†</sup> Varun Dewaker,<sup>a</sup> Ankita Rani,<sup>b,d</sup> Sangh Priya Singh,<sup>a,d</sup> Mukul Dutta,<sup>b,d</sup> Shivani Katiyar,<sup>b</sup> Sandeep Kumar Singh,<sup>c,d</sup> Mamunur Rashid,<sup>c</sup> Muhammad Wahajuddin,<sup>c,d,e</sup> Susanta Kar,<sup>\*b,d</sup> and Ajay Kumar Srivastava<sup>\*,a,d</sup>

<sup>a</sup>*Medicinal and Process Chemistry Division, CSIR-Central Drug Research Institute, Lucknow-226031, Uttar Pradesh, India, \*E-mail: ajayk.srivastava@cdri.res.in*

<sup>b</sup>*Molecular Microbiology and Immunology Division, CSIR-Central Drug Research Institute, Lucknow-226031, Uttar Pradesh, India, \*E-mail: susantakar@cdri.res.in*

<sup>c</sup>*Pharmaceutics and Pharmacokinetics Division, CSIR-Central Drug Research Institute, Lucknow-226031, Uttar Pradesh, India*

<sup>d</sup>*Academy of Scientific and Innovative Research (AcSIR), Ghaziabad-201002, Uttar Pradesh, India*

<sup>e</sup>*Institute of Cancer Therapeutics, School of Pharmacy and Medical Sciences, Faculty of life Sciences, University of Bradford, Richmond Road, Bradford BD7 1DP UK (Present address)*

### **Table of Contents**

|    |                                                                  |         |
|----|------------------------------------------------------------------|---------|
| 1. | Table S1, S2 and S3                                              | S2-S5   |
| 2. | <sup>1</sup> H, <sup>13</sup> C, and <sup>19</sup> F NMR Spectra | S6-S30  |
| 3. | HRMS Spectra                                                     | S31-S41 |
| 4. | HPLC Chromatograms                                               | S42-S71 |

**Table S1.** *In vitro* cytotoxicity of compounds **5a-p**, **6a-i**, **7a-c**, and **8a-b**<sup>[a]</sup>

| Code      | % Inhibition on host J774 macrophage cell line |                  |                  |                  |                  |
|-----------|------------------------------------------------|------------------|------------------|------------------|------------------|
|           | 6.25 $\mu$ M                                   | 12.5 $\mu$ M     | 25 $\mu$ M       | 50 $\mu$ M       | 100 $\mu$ M      |
| <b>5a</b> | 14.43 $\pm$ 0.39                               | 15.62 $\pm$ 1.26 | 14.17 $\pm$ 5.26 | 55.74 $\pm$ 3.97 | 69.88 $\pm$ 6.11 |
| <b>5b</b> | 6.77 $\pm$ 0.28                                | 11.45 $\pm$ 9.19 | 24.17 $\pm$ 1.87 | 34.33 $\pm$ 2.35 | 59.28 $\pm$ 4.95 |
| <b>5c</b> | 15.64 $\pm$ 4.18                               | 17.81 $\pm$ 3.21 | 22.34 $\pm$ 2.4  | 59.97 $\pm$ 2.29 | 68.21 $\pm$ 5.54 |
| <b>5d</b> | 14.53 $\pm$ 2.63                               | 19.96 $\pm$ 3.45 | 23.11 $\pm$ 4.19 | 58.07 $\pm$ 4.98 | 81.47 $\pm$ 6.24 |
| <b>5e</b> | 4.72 $\pm$ 3.01                                | 22.57 $\pm$ 4.41 | 13.46 $\pm$ 1.29 | 67.62 $\pm$ 5.30 | 87.14 $\pm$ 5.42 |
| <b>5f</b> | 3.54 $\pm$ 2.47                                | 19.21 $\pm$ 0.94 | 26.46 $\pm$ 1.46 | 47.55 $\pm$ 2.39 | 50.56 $\pm$ 6.17 |
| <b>5g</b> | 8.72 $\pm$ 5.65                                | 13.47 $\pm$ 1.55 | 24.93 $\pm$ 2.95 | 28.51 $\pm$ 2.64 | 56.37 $\pm$ 4.82 |
| <b>5h</b> | 12.31 $\pm$ 1.64                               | 16.77 $\pm$ 1.22 | 21.25 $\pm$ 1.69 | 41.27 $\pm$ 3.36 | 73.48 $\pm$ 2.87 |
| <b>5i</b> | 6.37 $\pm$ 1.08                                | 19.25 $\pm$ 1.04 | 48.45 $\pm$ 3.34 | 59.13 $\pm$ 1.57 | 62.35 $\pm$ 3.57 |
| <b>5j</b> | 13.25 $\pm$ 1.01                               | 18.49 $\pm$ 0.91 | 25.33 $\pm$ 1.80 | 36.24 $\pm$ 4.02 | 59.61 $\pm$ 2.32 |
| <b>5k</b> | 9.63 $\pm$ 1.01                                | 15.62 $\pm$ 0.97 | 23.95 $\pm$ 1.46 | 38.48 $\pm$ 3.44 | 51.64 $\pm$ 4.72 |
| <b>5l</b> | 11.16 $\pm$ 0.71                               | 12.43 $\pm$ 2.28 | 26.67 $\pm$ 2.43 | 46.97 $\pm$ 1.81 | 68.15 $\pm$ 2.91 |
| <b>5m</b> | 8.45 $\pm$ 0.86                                | 11.09 $\pm$ 0.82 | 27.65 $\pm$ 3.91 | 23.36 $\pm$ 1.52 | 41.55 $\pm$ 2.93 |
| <b>5n</b> | 9.16 $\pm$ 0.79                                | 13.59 $\pm$ 1.06 | 25.61 $\pm$ 2.23 | 46.18 $\pm$ 1.01 | 63.97 $\pm$ 4.97 |
| <b>5o</b> | 12.05 $\pm$ 1.62                               | 22.18 $\pm$ 2.64 | 24.16 $\pm$ 2.51 | 67.92 $\pm$ 1.79 | 73.45 $\pm$ 2.12 |
| <b>5p</b> | 9.04 $\pm$ 4.76                                | 16.71 $\pm$ 3.30 | 20.33 $\pm$ 1.13 | 51.46 $\pm$ 4.76 | 77.32 $\pm$ 6.16 |
| <b>6a</b> | 9.26 $\pm$ 5.47                                | 17.65 $\pm$ 4.45 | 22.37 $\pm$ 1.89 | 42.19 $\pm$ 3.76 | 61.52 $\pm$ 4.40 |
| <b>6b</b> | 12.34 $\pm$ 2.77                               | 15.86 $\pm$ 3.45 | 20.47 $\pm$ 2.13 | 63.89 $\pm$ 5.36 | 90.52 $\pm$ 7.60 |
| <b>6c</b> | 10.53 $\pm$ 2.41                               | 14.37 $\pm$ 5.67 | 25.76 $\pm$ 2.36 | 27.54 $\pm$ 3.16 | 63.39 $\pm$ 5.70 |
| <b>6d</b> | 5.65 $\pm$ 2.28                                | 16.34 $\pm$ 6.21 | 26.65 $\pm$ 3.44 | 45.83 $\pm$ 5.62 | 65.32 $\pm$ 5.62 |
| <b>6e</b> | 15.46 $\pm$ 2.23                               | 19.08 $\pm$ 8.19 | 23.61 $\pm$ 1.12 | 43.26 $\pm$ 3.45 | 71.58 $\pm$ 6.65 |
| <b>6f</b> | 7.88 $\pm$ 6.71                                | 5.32 $\pm$ 7.33  | 26.09 $\pm$ 0.95 | 58.29 $\pm$ 5.46 | 67.43 $\pm$ 5.32 |
| <b>6g</b> | 11.82 $\pm$ 4.53                               | 19.07 $\pm$ 6.65 | 24.88 $\pm$ 2.33 | 36.44 $\pm$ 2.93 | 59.81 $\pm$ 4.46 |
| <b>6h</b> | 9.74 $\pm$ 5.16                                | 12.37 $\pm$ 5.28 | 24.31 $\pm$ 3.67 | 53.15 $\pm$ 5.16 | 68.34 $\pm$ 7.12 |
| <b>6i</b> | 8.79 $\pm$ 4.33                                | 12.45 $\pm$ 8.17 | 23.31 $\pm$ 1.89 | 34.55 $\pm$ 2.88 | 48.61 $\pm$ 3.35 |
| <b>7a</b> | 12.34 $\pm$ 2.95                               | 19.76 $\pm$ 4.51 | 21.33 $\pm$ 4.15 | 62.57 $\pm$ 3.21 | 74.05 $\pm$ 7.61 |

|                    |            |            |            |            |             |
|--------------------|------------|------------|------------|------------|-------------|
| <b>7b</b>          | 17.65±6.71 | 22.15±3.32 | 26.42±2.31 | 44.52±4.61 | 58.16±5.94  |
| <b>7c</b>          | 19.16±8.89 | 13.28±5.61 | 21.17±0.95 | 49.11±5.61 | 62.37±4.55  |
| <b>8a</b>          | 14.53±5.54 | 19.22±6.65 | 23.74±3.14 | 37.31±3.45 | 54.47±6.81  |
| <b>8b</b>          | 15.14±6.14 | 13.69±5.13 | 18.05±2.11 | 43.28±5.16 | 59.83±6.32  |
| <b>Miltefosine</b> | 5.66±3.6   | 11.09±4.3  | 17.19±6.4  | 24.22±8.3  | 62.11 ±4.35 |

<sup>[a]</sup>Percentages of inhibition are expressed as mean ± standard deviation for each compound of three individual experiments performed in duplicates.

**Table S2.** *In vitro* anti-promastigote and anti-amastigote activities of compounds **5a-p**, **6a-i**, **7a-c**, and **8a-b**<sup>[a]</sup>

| Code      | Anti-promastigote activity |          |          | Anti-amastigote activity |          |           |
|-----------|----------------------------|----------|----------|--------------------------|----------|-----------|
|           | 6.25 µM                    | 12.5 µM  | 25 µM    | 6.25 µM                  | 12.5 µM  | 25 µM     |
| <b>5a</b> | 63.3±5.4                   | 65.9±5.1 | 70.2±6.1 | 51.2±3.1                 | 62.5±6.7 | 68.5±7.8  |
| <b>5b</b> | 12.0±2.3                   | 22.8±3.2 | 40.7±5.4 | 47.4±4.3                 | 58.3±7.2 | 68.2±4.5  |
| <b>5c</b> | 43.3±5.2                   | 54.3±4.8 | 63.8±4.5 | 52.9±6.6                 | 66.3±6.7 | 74.9±8.5  |
| <b>5d</b> | 46.2±4.6                   | 53.4±7.9 | 70.1±3.9 | 55.6±2.5                 | 49.7±5.5 | 64.8±5.7  |
| <b>5e</b> | 29.7±1.1                   | 55.1±8.1 | 61.9±2.7 | 29.7±3.1                 | 55.1±4.4 | 61.9±6.0  |
| <b>5f</b> | 36.6±3.5                   | 41.3±6.7 | 69.2±1.5 | 29.4±7.6                 | 59.6±6.1 | 69.6±7.2  |
| <b>5g</b> | 25.6±4.4                   | 36.8±4.4 | 45.9±3.3 | 26.8±8.8                 | 37.8±4.4 | 46.72±3.5 |
| <b>5h</b> | 47.1±3.6                   | 55.3±5.6 | 67.2±4.5 | 41.6±2.4                 | 55.3±6.2 | 45.5±0.9  |
| <b>5i</b> | 53.3±6.7                   | 58.3±6.1 | 64.1±7.3 | 53.3±6.2                 | 58.3±6.3 | 74.1±1.1  |
| <b>5j</b> | 52.1±4.1                   | 64.8±3.3 | 68.3±4.4 | 64.8±4.8                 | 68.3±6.5 | 72.7±6.8  |
| <b>5k</b> | 55.6±1.0                   | 66.2±7.7 | 71.7±8.2 | 76.1±8.8                 | 78.7±7.2 | 75.7±7.2  |
| <b>5l</b> | 49.8±0.7                   | 56.4±8.2 | 69.4±5.4 | 47.6±5.3                 | 62.8±5.4 | 66.6±5.4  |
| <b>5m</b> | 69.8±0.4                   | 76.9±4.6 | 85.4±7.7 | 57.8±6.6                 | 65.3±7.3 | 85.6±9.3  |
| <b>5n</b> | 65.1±0.8                   | 73.5±3.3 | 78.6±3.1 | 27.4±2.9                 | 64.3±5.6 | 75.9±6.4  |
| <b>5o</b> | 53.5±1.6                   | 51.9±6.4 | 60.9±5.4 | 41.7±3.7                 | 52.9±4.5 | 56.0±5.2  |
| <b>5p</b> | 58.9±0.8                   | 61.0±2.2 | 70.0±6.6 | 58.9±1.6                 | 62.1±7.1 | 75.8±8.4  |
| <b>6a</b> | 27.9±0.5                   | 33.3±4.9 | 40.7±3.4 | 29.2±3.1                 | 34.4±3.1 | 60.0±6.6  |
| <b>6b</b> | 21.3±0.8                   | 32.7±5.7 | 47.4±4.6 | 16.6±0.5                 | 25.2±1.0 | 41.1±9.7  |

|                    |                |            |                |                 |                |                |
|--------------------|----------------|------------|----------------|-----------------|----------------|----------------|
| <b>6c</b>          | 11.2±1.4       | 12.4±7.7   | 39.8±6.1       | 12.6±1.4        | 14.3±1.5       | 42.9±4.6       |
| <b>6d</b>          | 10.0±1.3       | 23.7±8.3   | 43.4±3.2       | 11.4±2.3        | 27.2±3.2       | 46.9±4.2       |
| <b>6e</b>          | 8.2±2.2        | 24.4±3.3   | 41.2±1.0       | 9.7±8.2         | 25.6±2.3       | 42.1±3.9       |
| <b>6f</b>          | 29.8±0.7       | 41.4±1.2   | 50.2±1.2       | 21.0±9.0        | 42.9±5.5       | 53.9±6.2       |
| <b>6g</b>          | 27.6±1.5       | 32.9±2.3   | 40.6±2.        | 28.2±2.3        | 34.0±4.7       | 31.7±2.7       |
| <b>6h</b>          | 25.2±1.0       | 36.2±4.6   | 45.9±0.9       | 16.5±7.1        | 35.3±3.4       | 47.0±4.4       |
| <b>6i</b>          | 46.0±3.4       | 46.7±5.0   | 52.0±5.5       | 21.7±6.5        | 31.5±2.8       | 47.5±5.4       |
| <b>7a</b>          | 29.7±3.9       | 55.1±4.5   | 61.9±6.2       | 63.3±3.2        | 76.0±7.1       | 75.0±7.6       |
| <b>7b</b>          | 55.4±4.6       | 76.1±7.1   | 79.6±8.1       | 45.4±2.9        | 54.1±5.0       | 72.2±6.8       |
| <b>7c</b>          | 42.9±3.8       | 46.9±3.9   | 76.5±3.6       | 37.8±4.1        | 53.2±7.7       | 46.3±5.1       |
| <b>8a</b>          | 52.0±7.0       | 62.8±5.6   | 72.7±6.9       | 42.2±5.6        | 54.8±4.9       | 71.3±6.9       |
| <b>8b</b>          | 63.4±7.5       | 73.8±7.1   | 77.2±4.2       | 32.1±4.1        | 47.6±3.2       | 69.4±8.2       |
| <b>Miltefosine</b> | 49.56±<br>4.61 | 85.01±1.61 | 91.95±<br>3.52 | 49.3± 12<br>.04 | 76.49±<br>10.1 | 93.11±<br>1.81 |

<sup>[a]</sup>Percentages of inhibition are expressed as mean ± standard deviation for each compound of three individual experiments performed in duplicates.

**Table S3.** Docking scores and binding interaction with LdTOP1.

| <b>Code</b>         | <b>LdTOP1</b> | <b>Hydrogen Bond Interactions</b> | <b>Arene-arene / Arene-H Interactions</b> | <b>Secondary Residues</b>                                                                                                 |
|---------------------|---------------|-----------------------------------|-------------------------------------------|---------------------------------------------------------------------------------------------------------------------------|
| <b>5m</b>           | -8.4789       | Lys352                            | Tgp11                                     | Asn178, Ala177, Met254, Tyr252, Thr246, Pro257, Lys250, His453, Arg314, Thr217, Asp353, DT10, DG12, DA113, Ile220, Asn221 |
| <b>5n</b>           | -8.5766       | Asn221                            | Tgp11, DT10                               | Lys352, His453, Arg314, Thr217, Asp353, Ile355, DG12, DC112, Asn178, Ala177, DA113, Tyr222, Ile220                        |
| <b>7a</b>           | -8.3910       | Asn221                            | DT10, Tgp11                               | Asn178, DC112, Pro257, Ala177, DA113, Tyr252, Lys251, DT9, Lys352, Arg314, His453, Thr217, Tyr222, Ile220                 |
| <b>8a</b>           | -9.4846       | Asn178                            | Tgp11, DC112                              | Ala177, Tyr252, DT9, Pro257, DT10, Ile220, Asn221, DA113, Lys200, Glu182, Met254, Lys251                                  |
| <b>Camptothecin</b> | -7.7961       | Lys352, Asp353, Arg314            | Tgp11                                     | Thr217, Ile220, His453, Asn221, Tyr222, DT10, DC112, DG12, DA113, Asn178                                                  |

➤ **<sup>1</sup>H, <sup>13</sup>C, and <sup>19</sup>F NMR Spectra:**

**Figure S1: <sup>1</sup>H NMR of compound 5a**

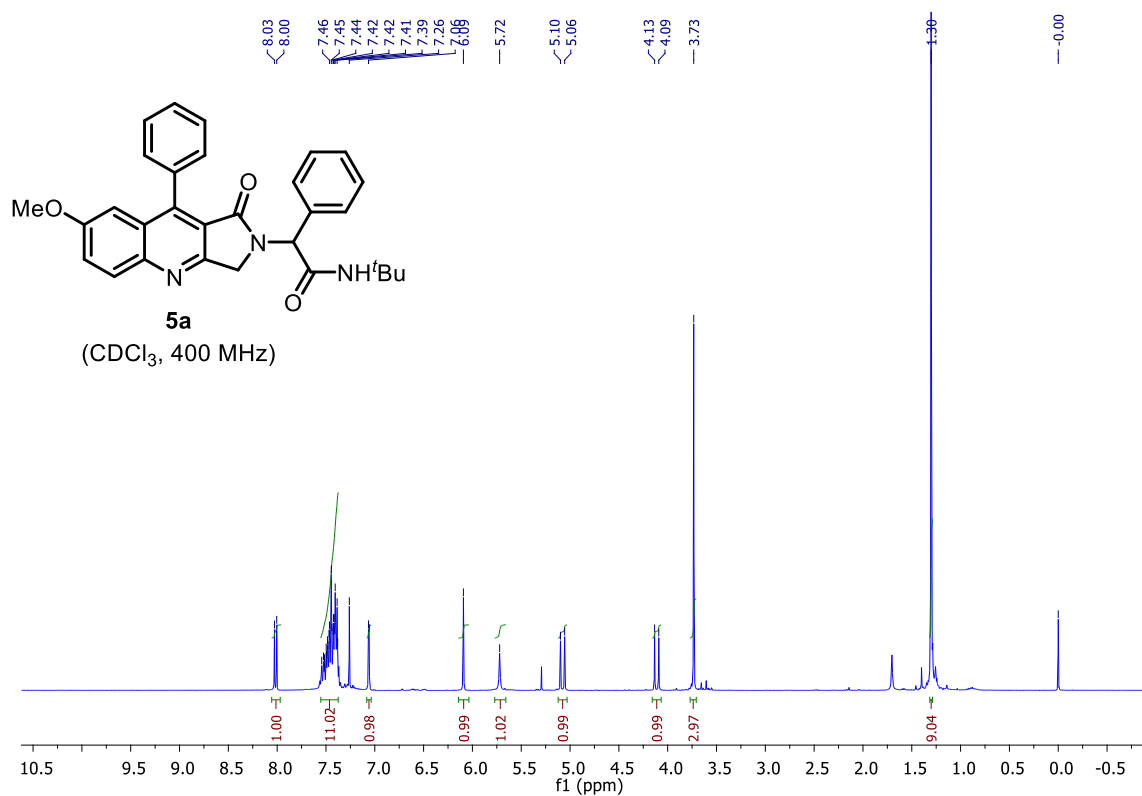

**Figure S2: <sup>13</sup>C NMR of compound 5a**

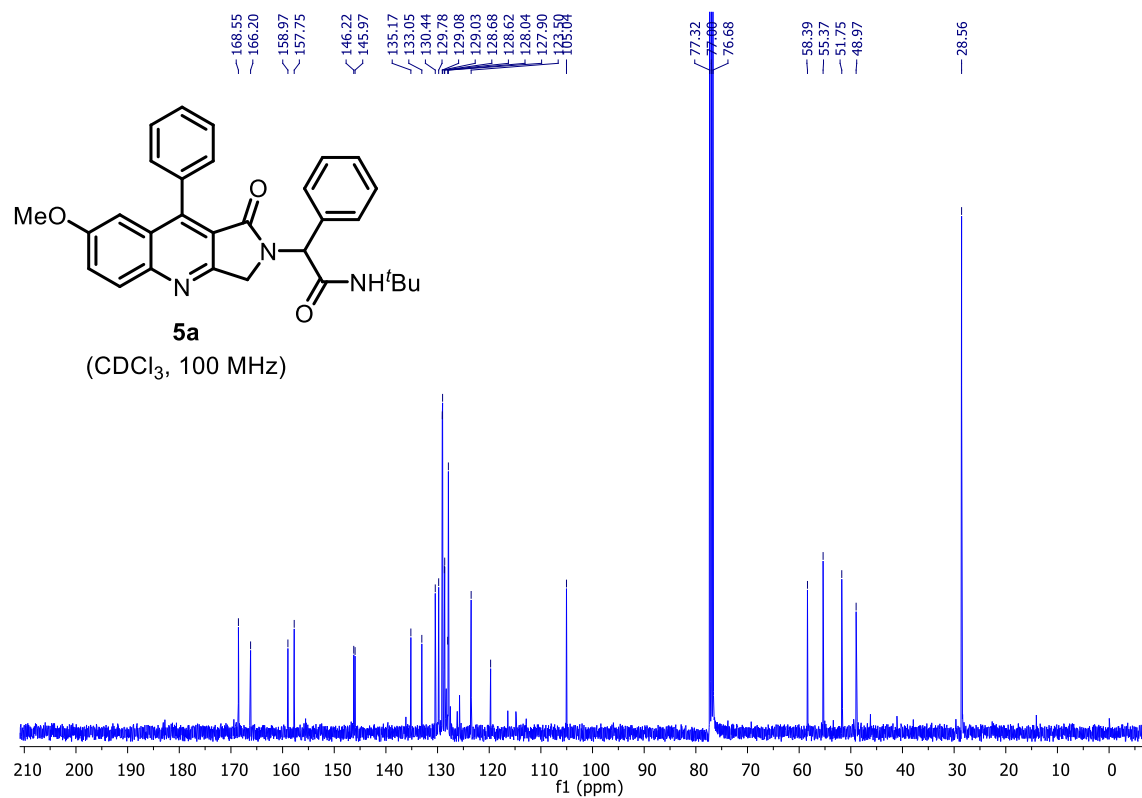

Figure S3:  $^1\text{H}$  NMR of compound **5e**

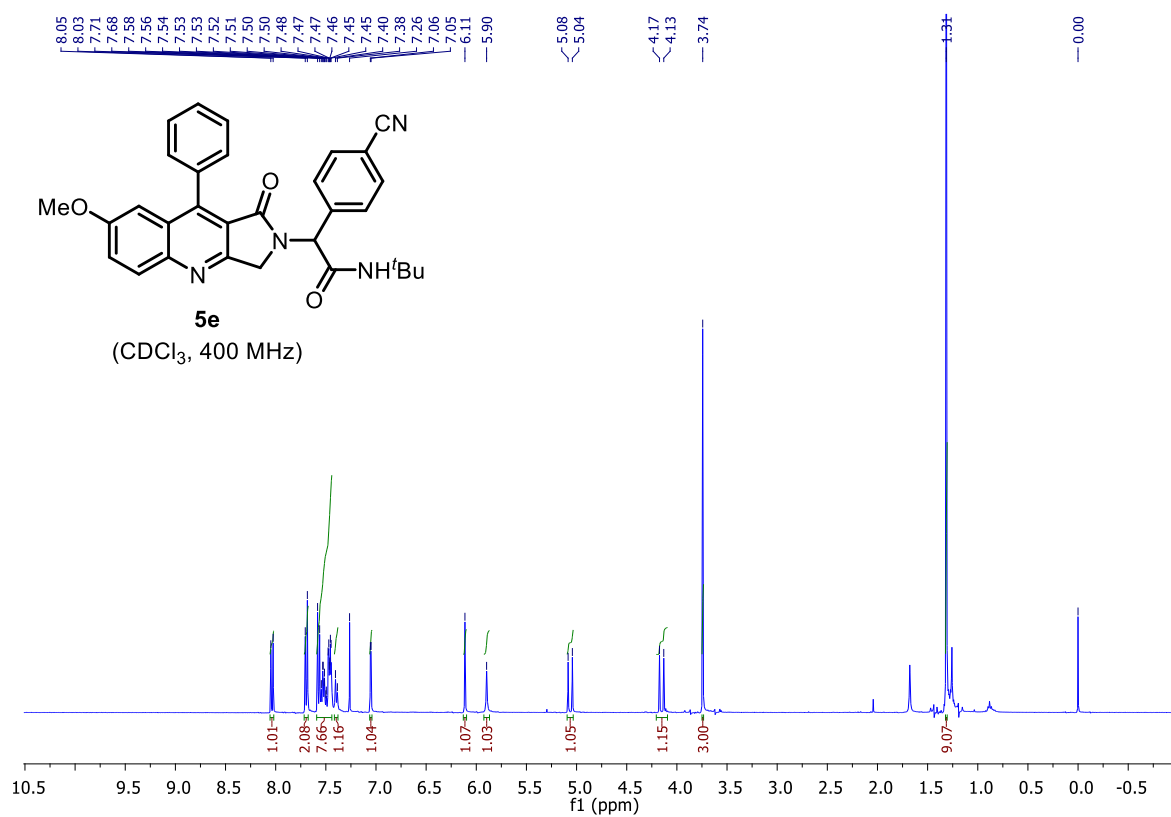

Figure S4:  $^{13}\text{C}$  NMR of compound **5e**

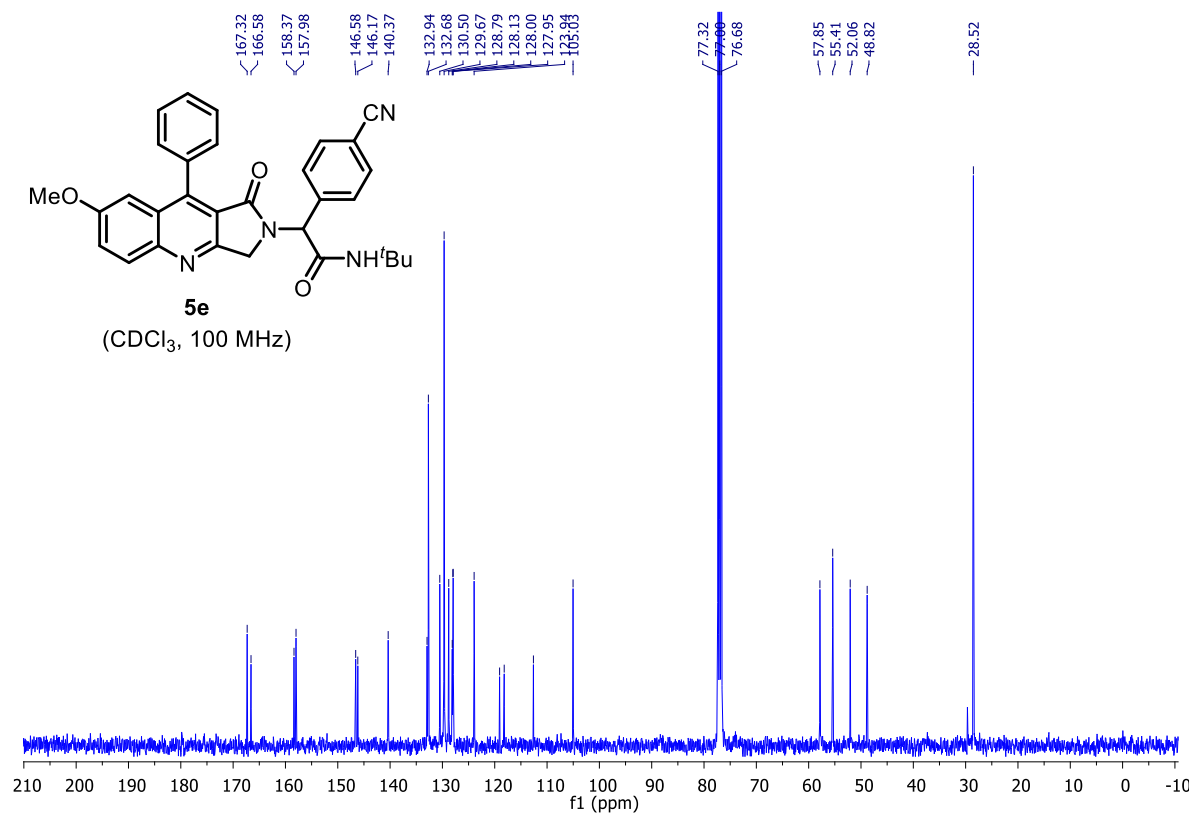

Figure S5:  $^1\text{H}$  NMR of compound **5i**

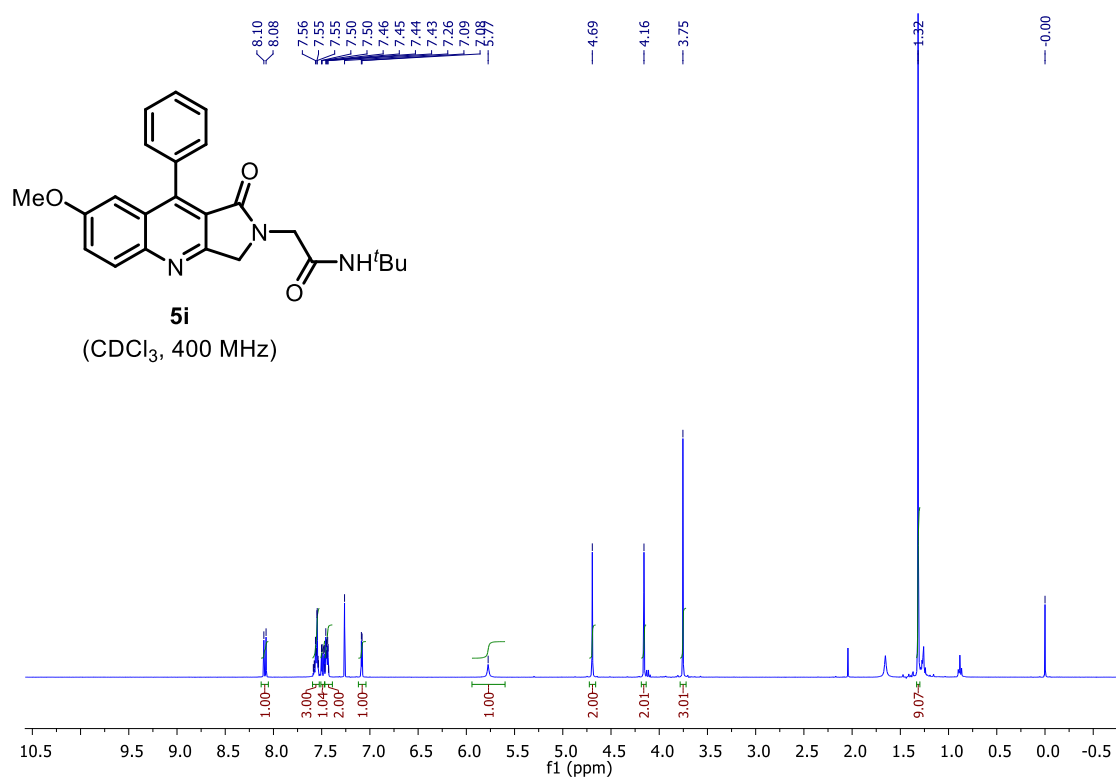

Figure S6:  $^{13}\text{C}$  NMR of compound **5i**

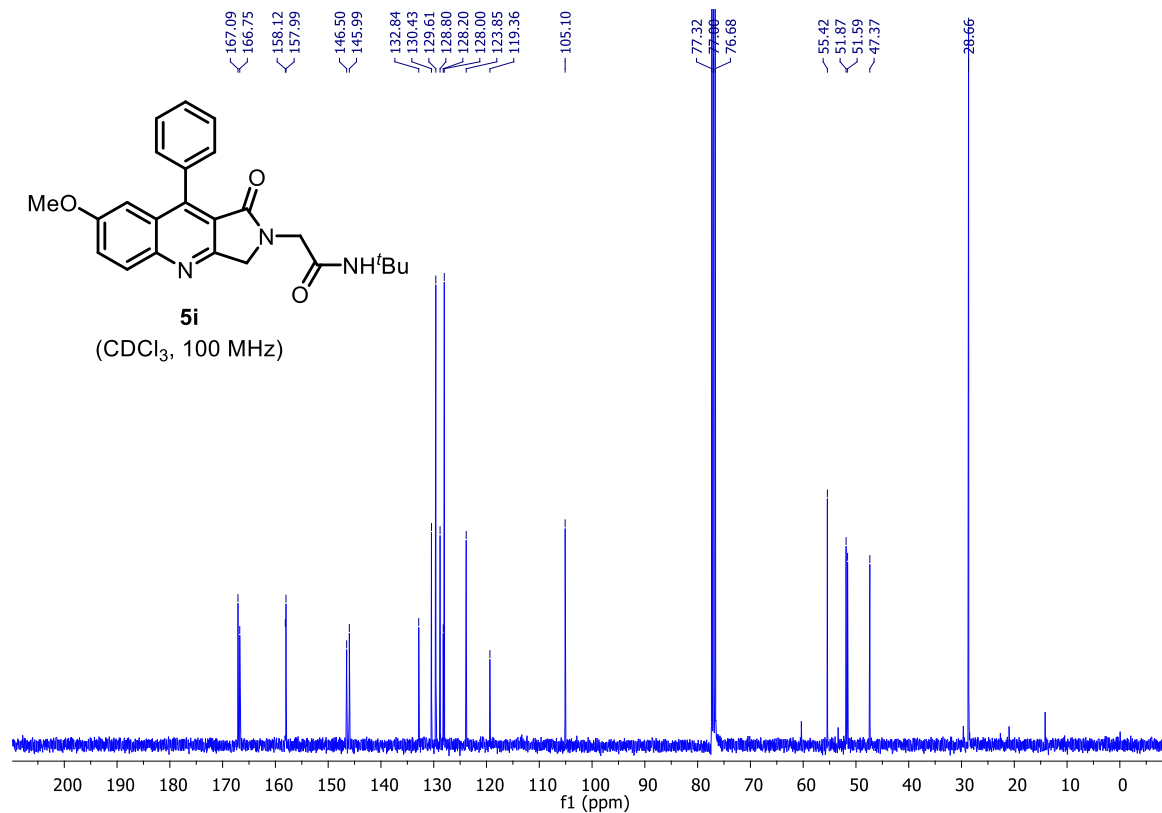



**Figure S7:**  $^1\text{H}$  NMR of compound **5m**

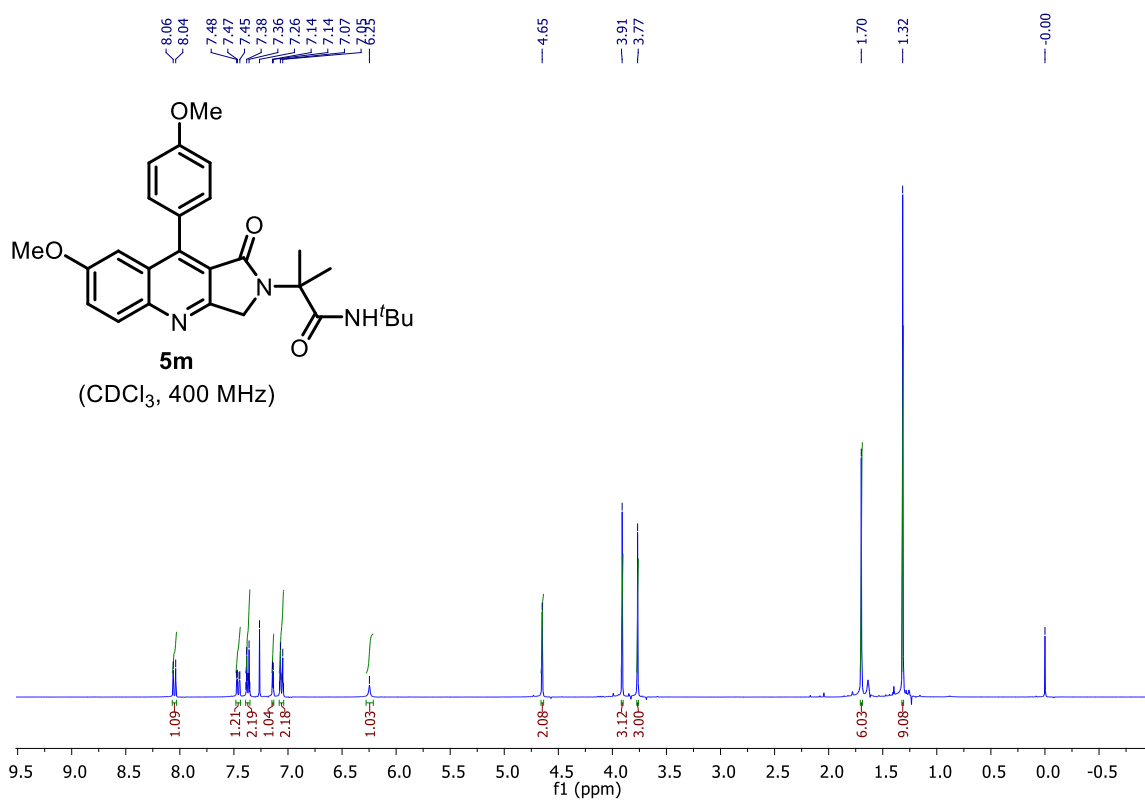

**Figure S8:**  $^{13}\text{C}$  NMR of compound **5m**

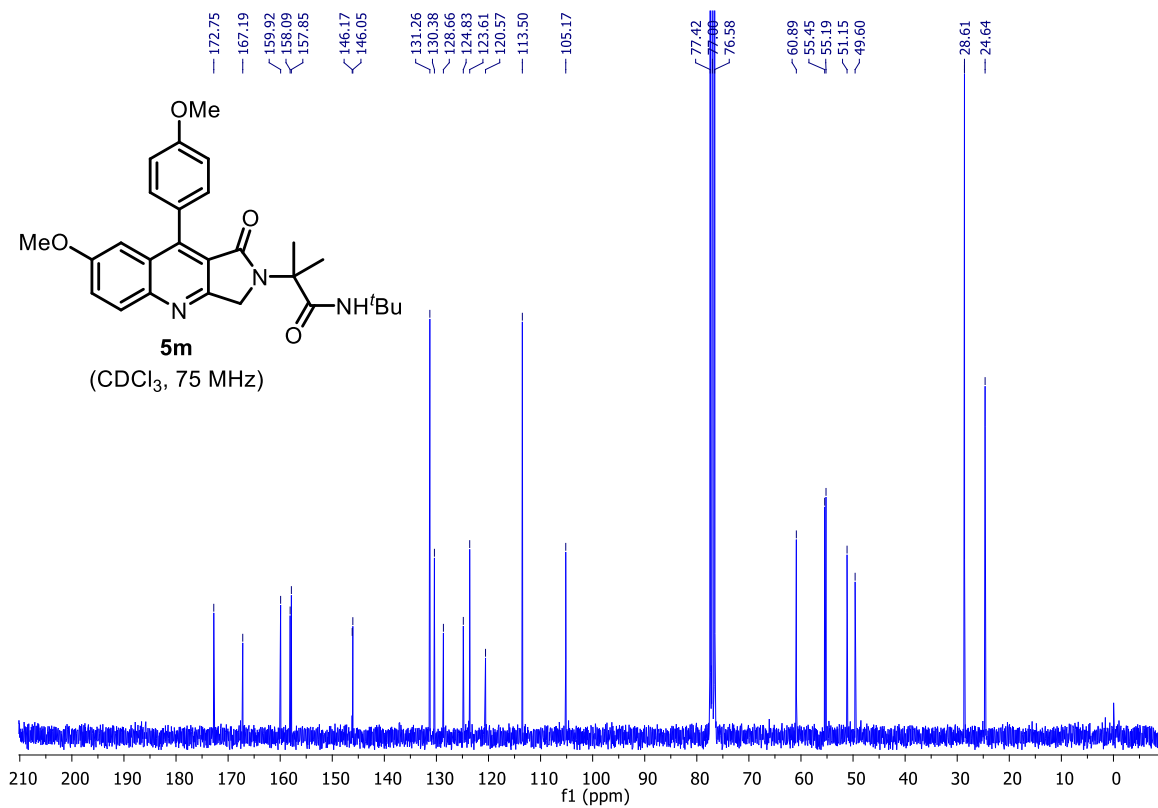

**Figure S9:**  $^1\text{H}$  NMR of compound **5n**

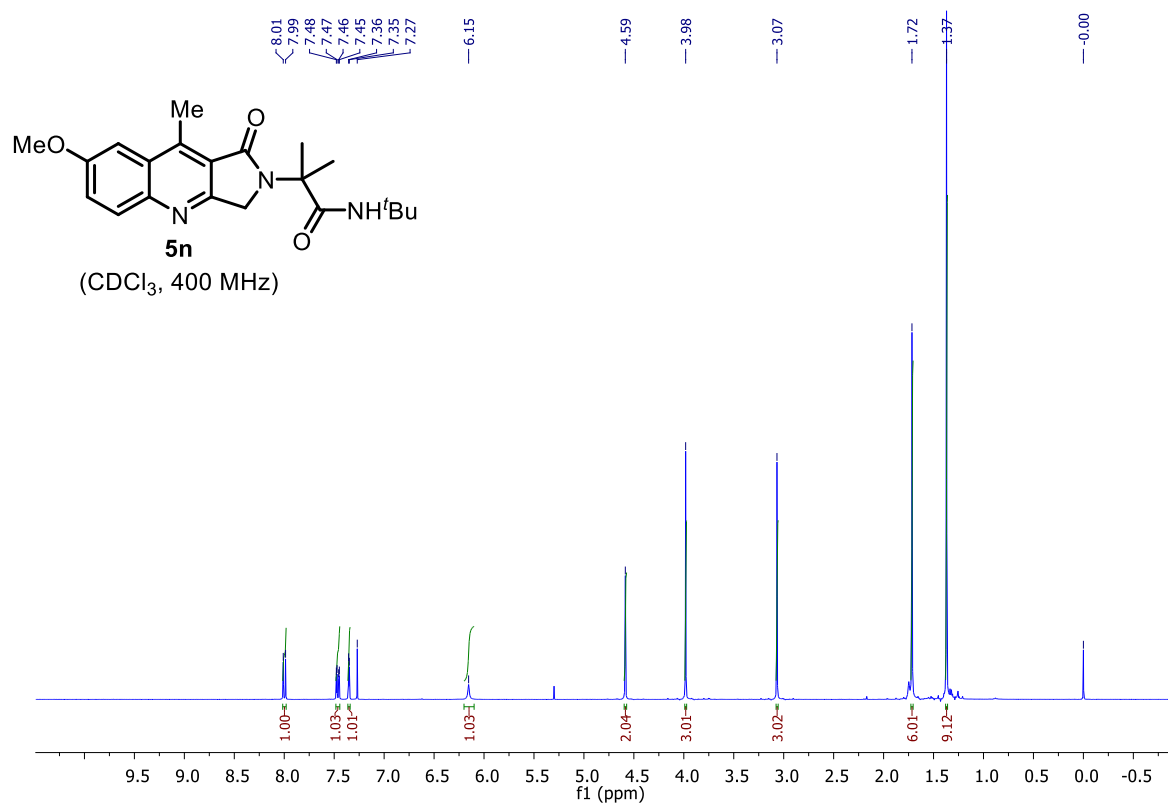

**Figure S10:**  $^{13}\text{C}$  NMR of compound **5n**

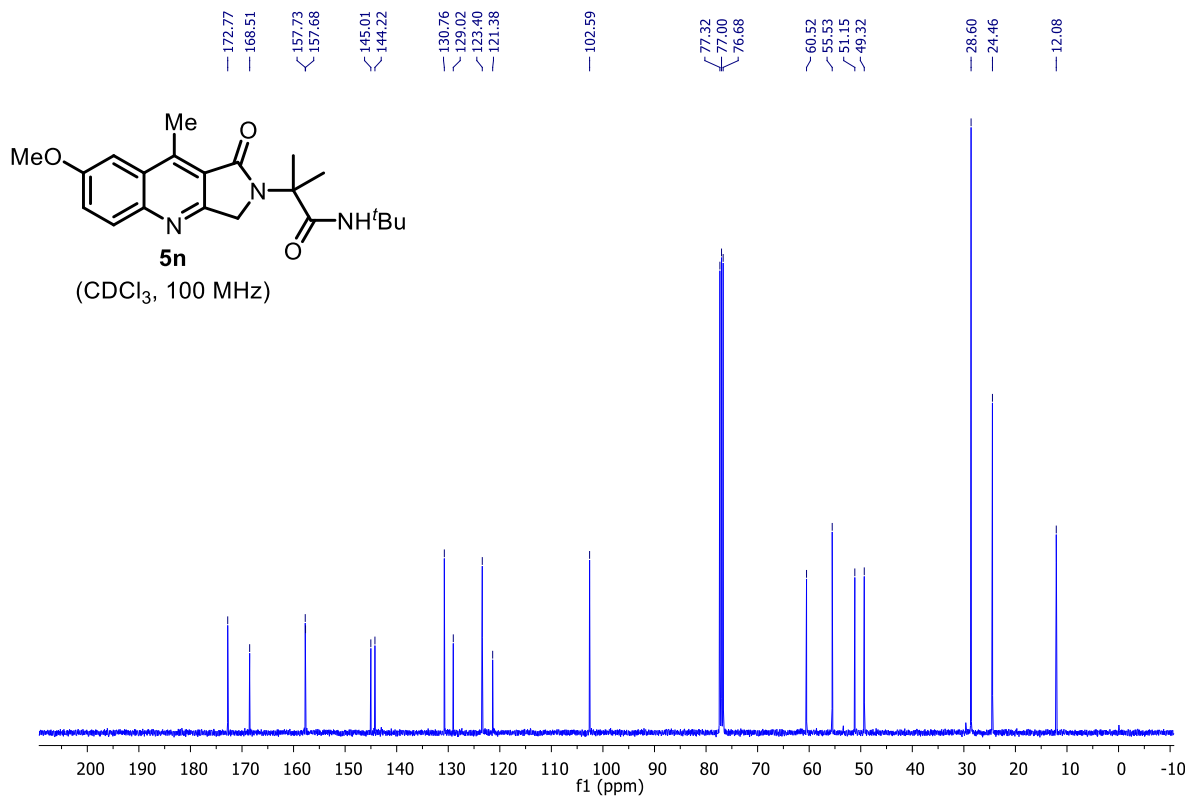

**Figure S11:**  $^1\text{H}$  NMR of compound **5o**

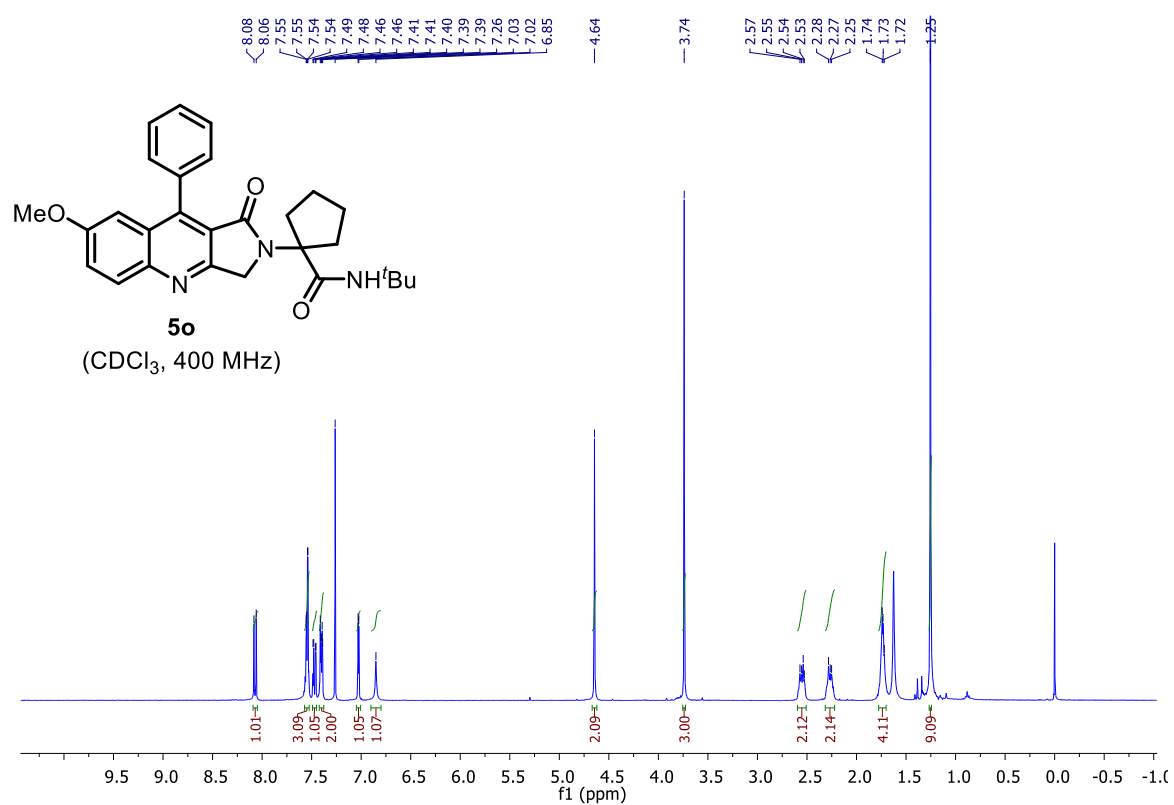

**Figure S12:**  $^{13}\text{C}$  NMR of compound **5o**

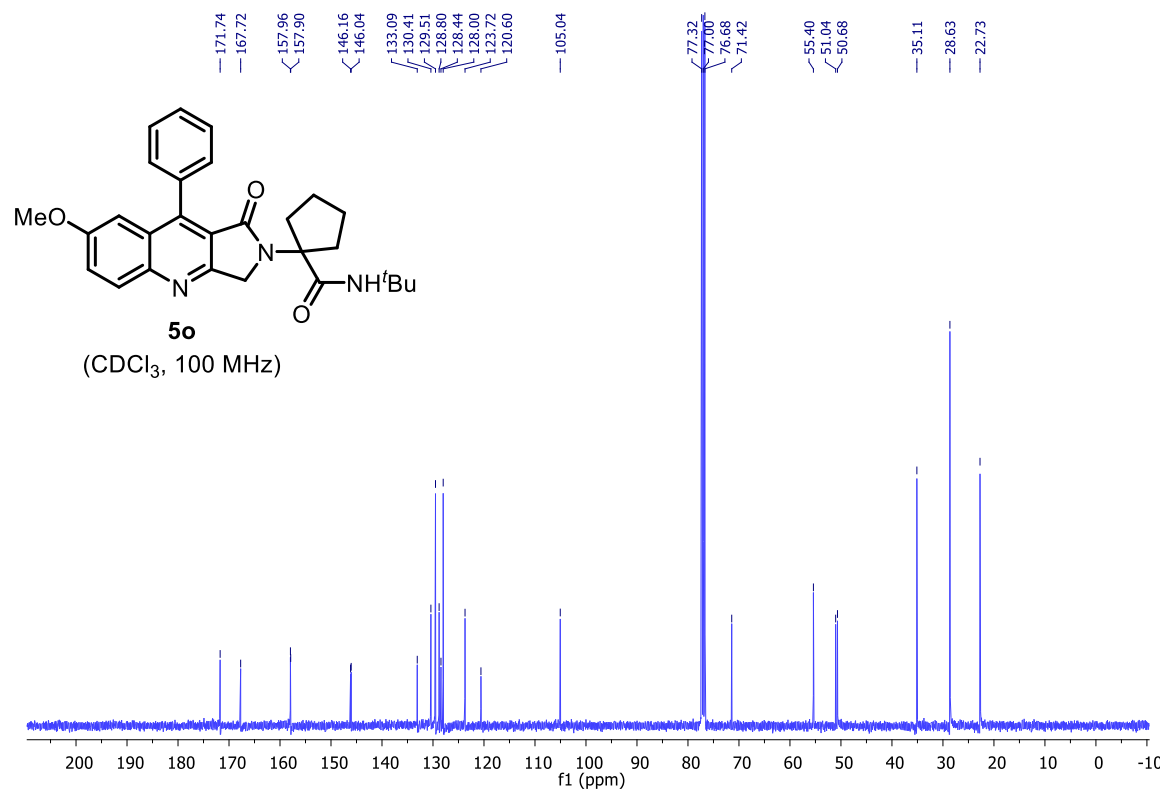

**Figure S13:**  $^1\text{H}$  NMR of compound **5p**

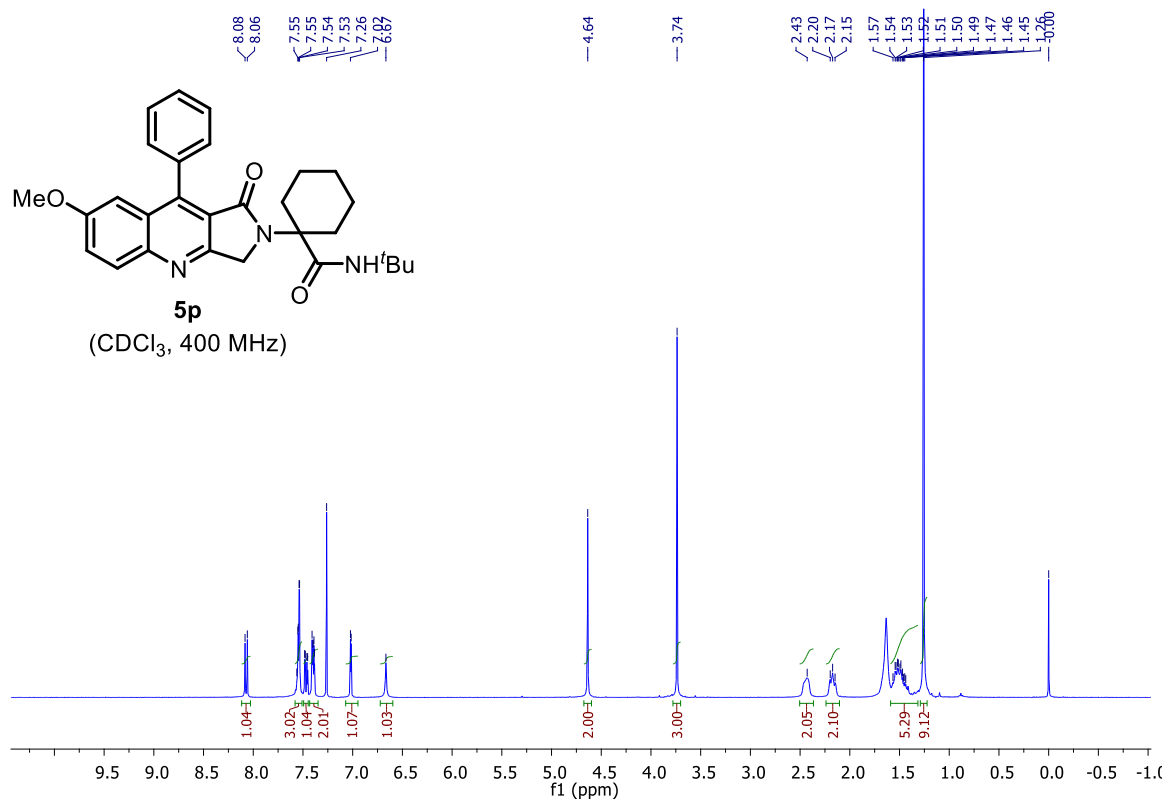

**Figure S14:**  $^{13}\text{C}$  NMR of compound **5p**

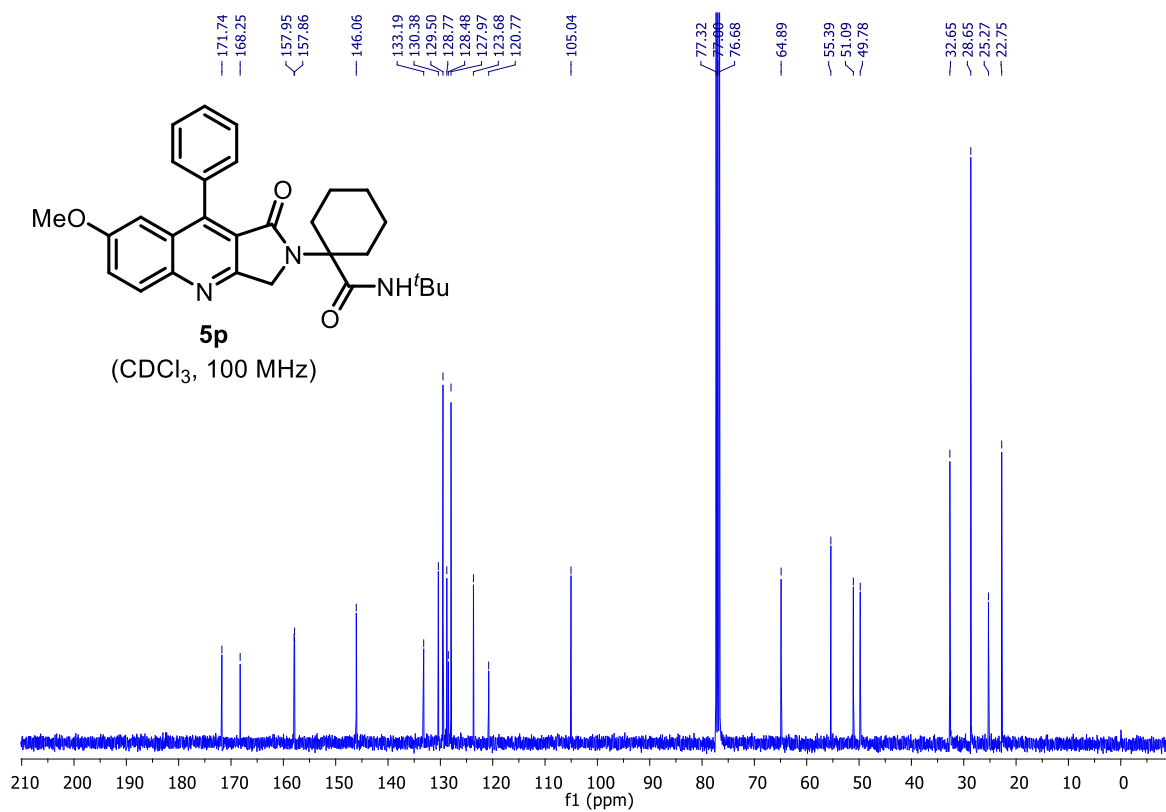

**Figure S15:**  $^1\text{H}$  NMR of compound **5q**

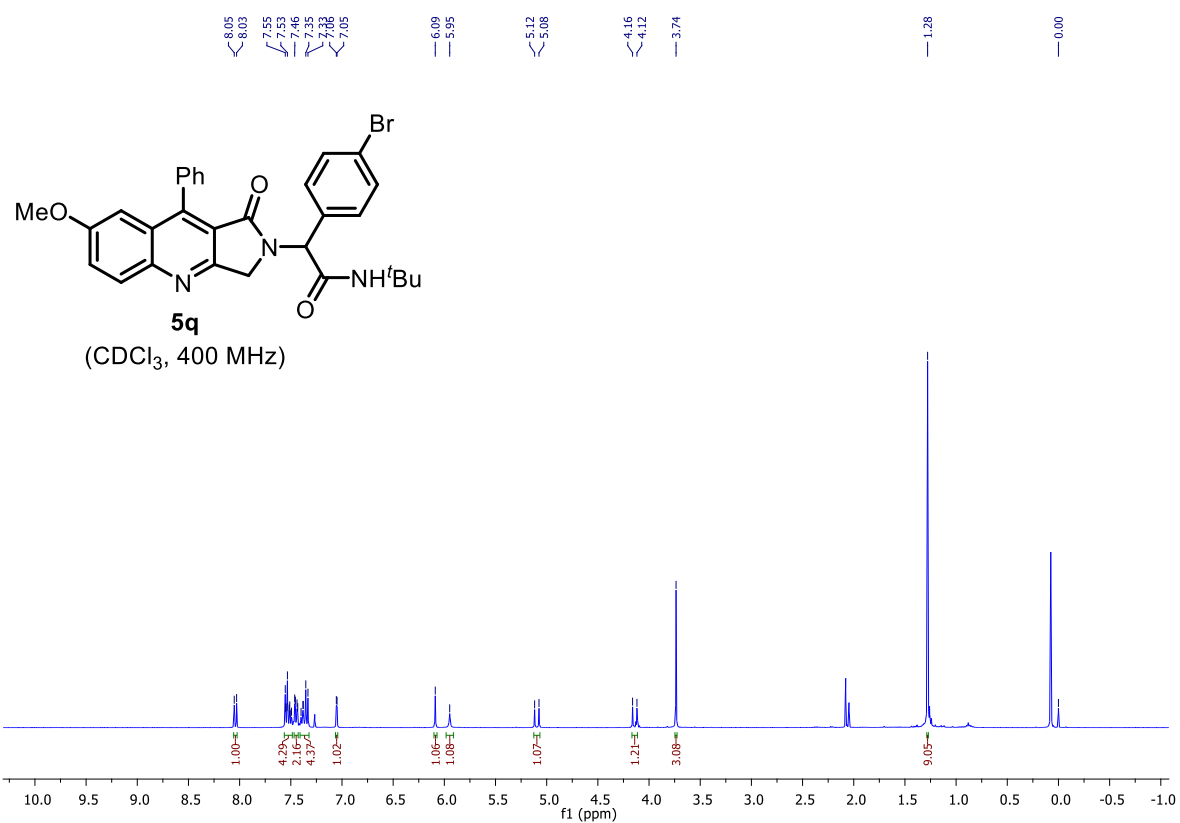

**Figure S16:**  $^{13}\text{C}$  NMR of compound **5q**

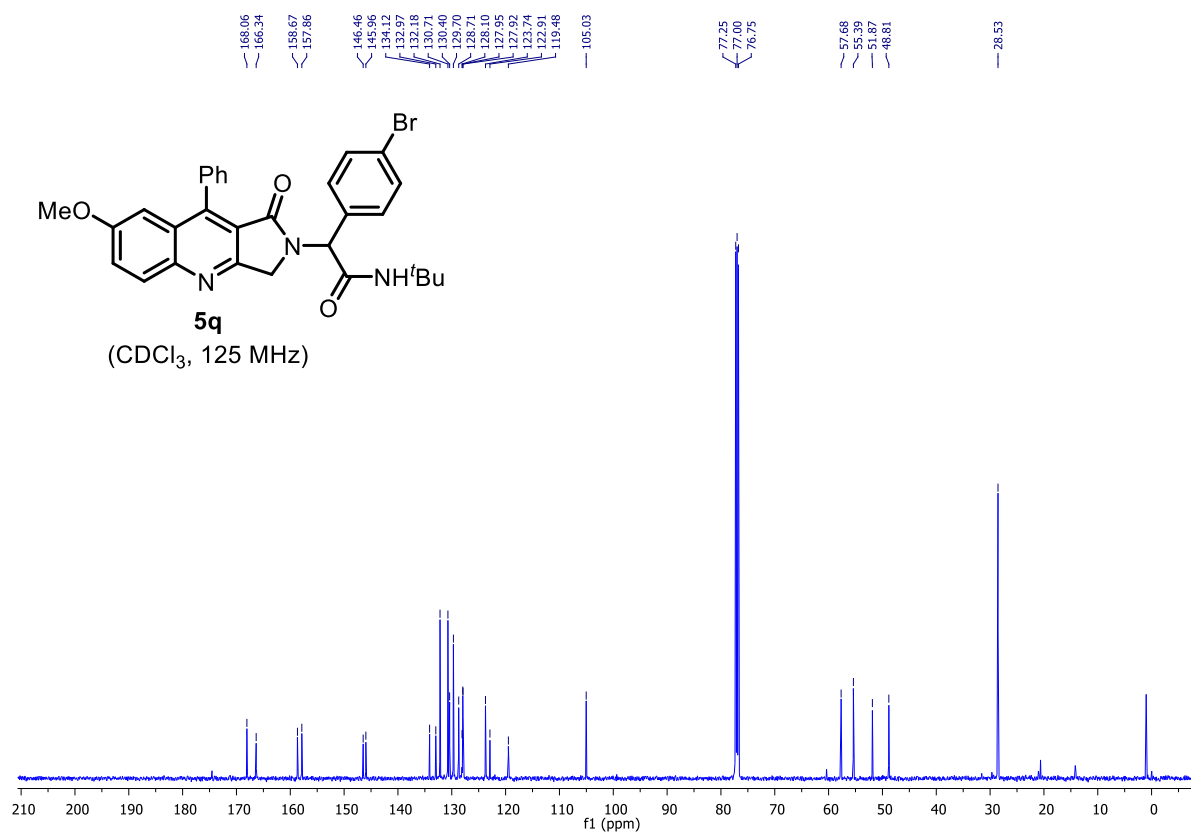

**Figure S17:**  $^1\text{H}$  NMR of compound **5r**

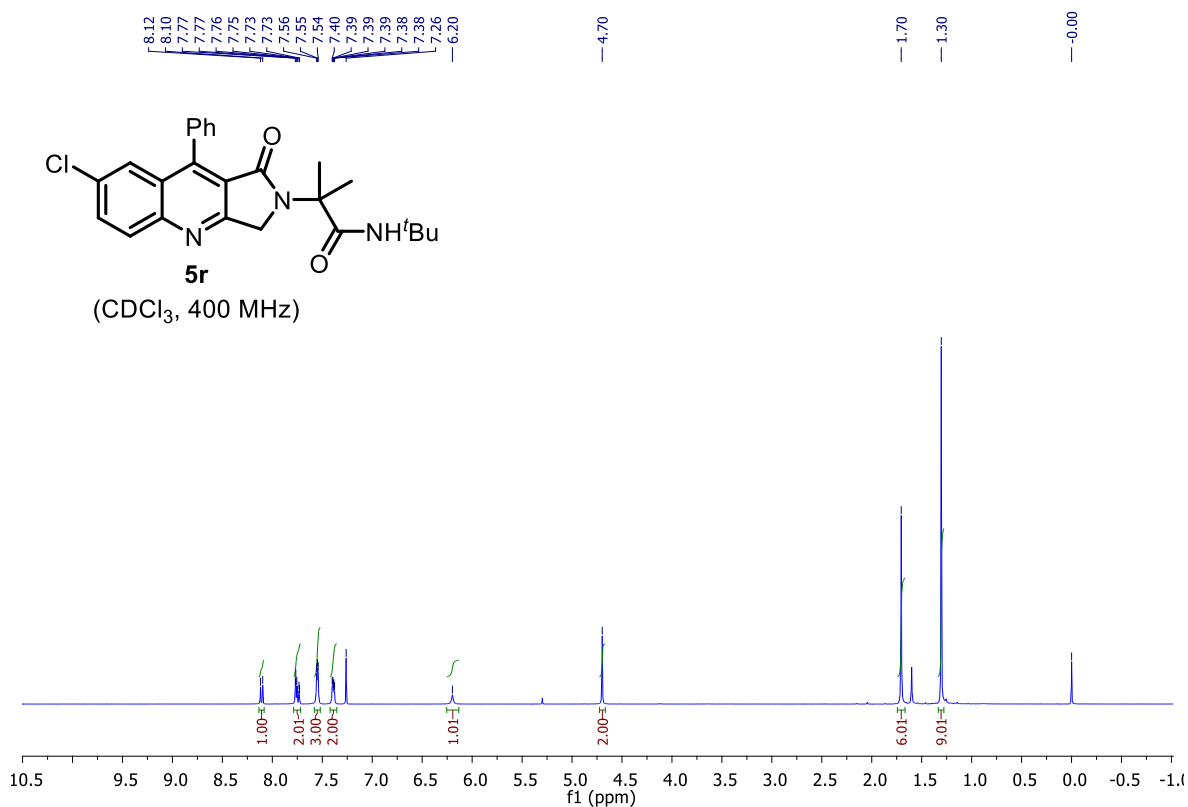

**Figure S18:**  $^{13}\text{C}$  NMR of compound **5r**

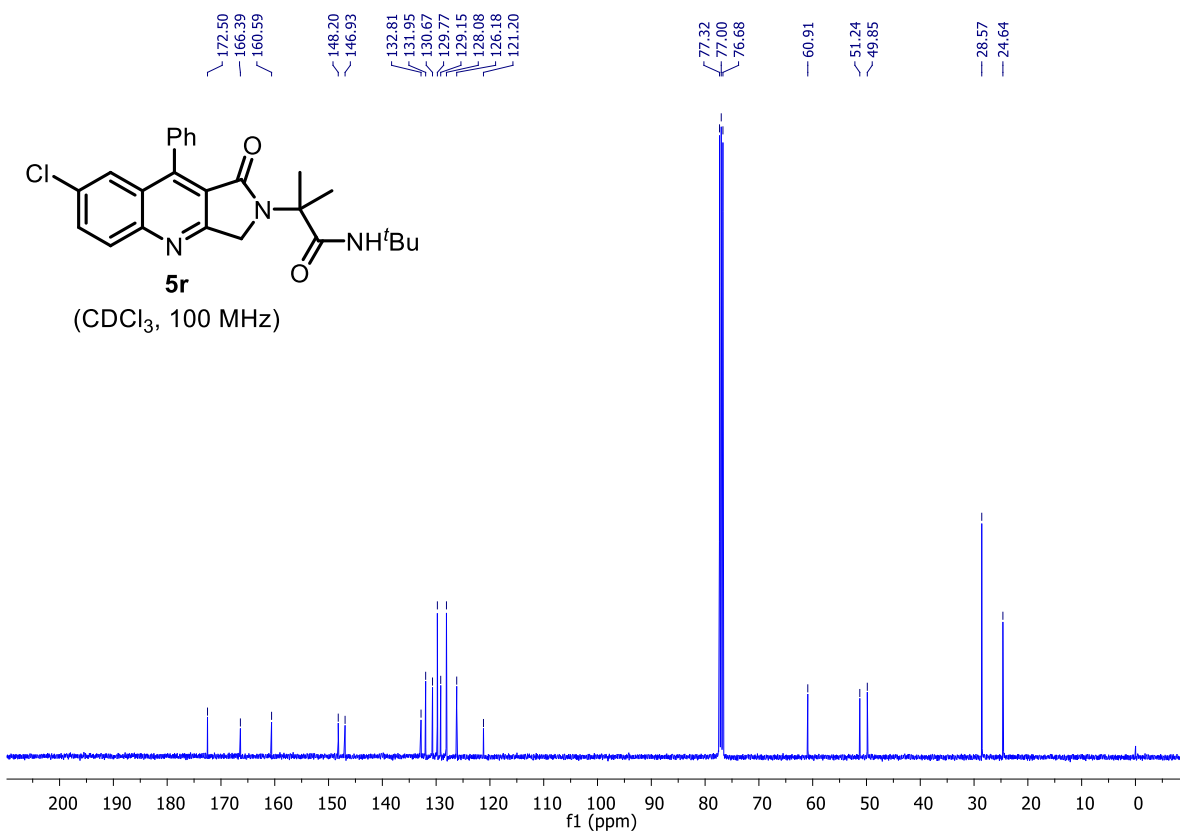

**Figure S19:**  $^1\text{H}$  NMR of compound **6a**

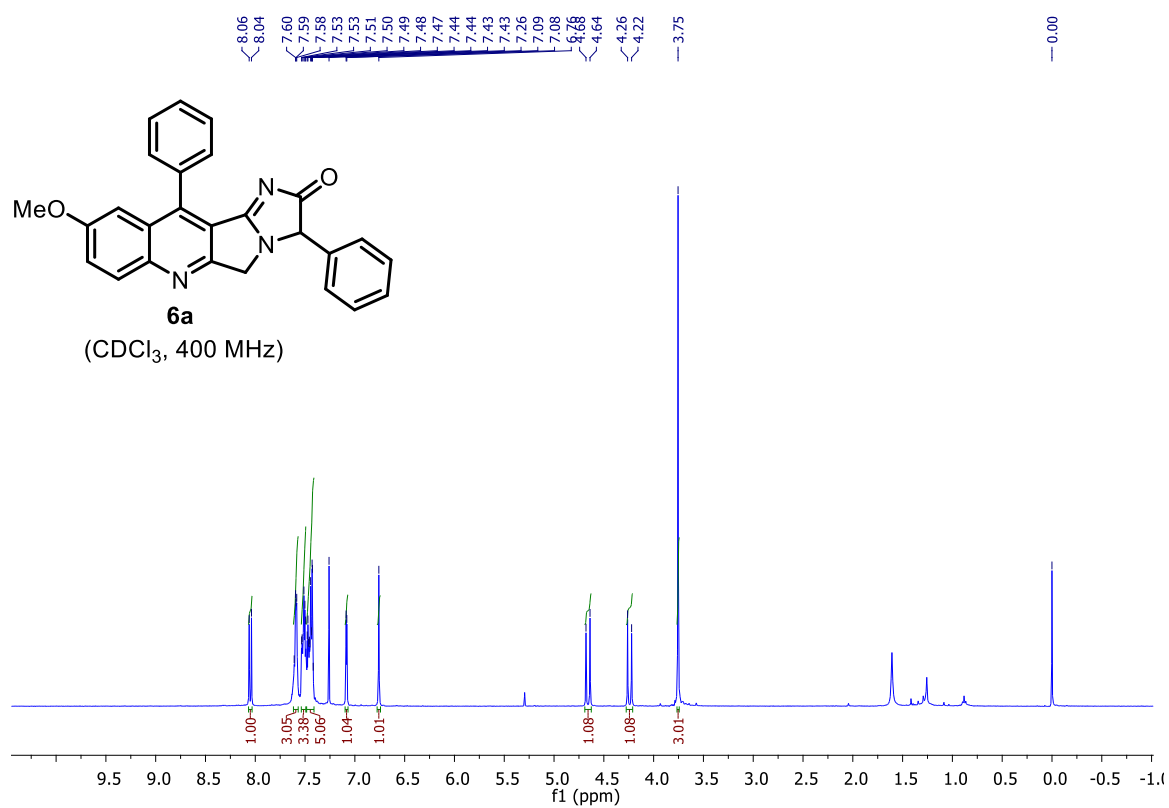

**Figure S20:**  $^{13}\text{C}$  NMR of compound **6a**

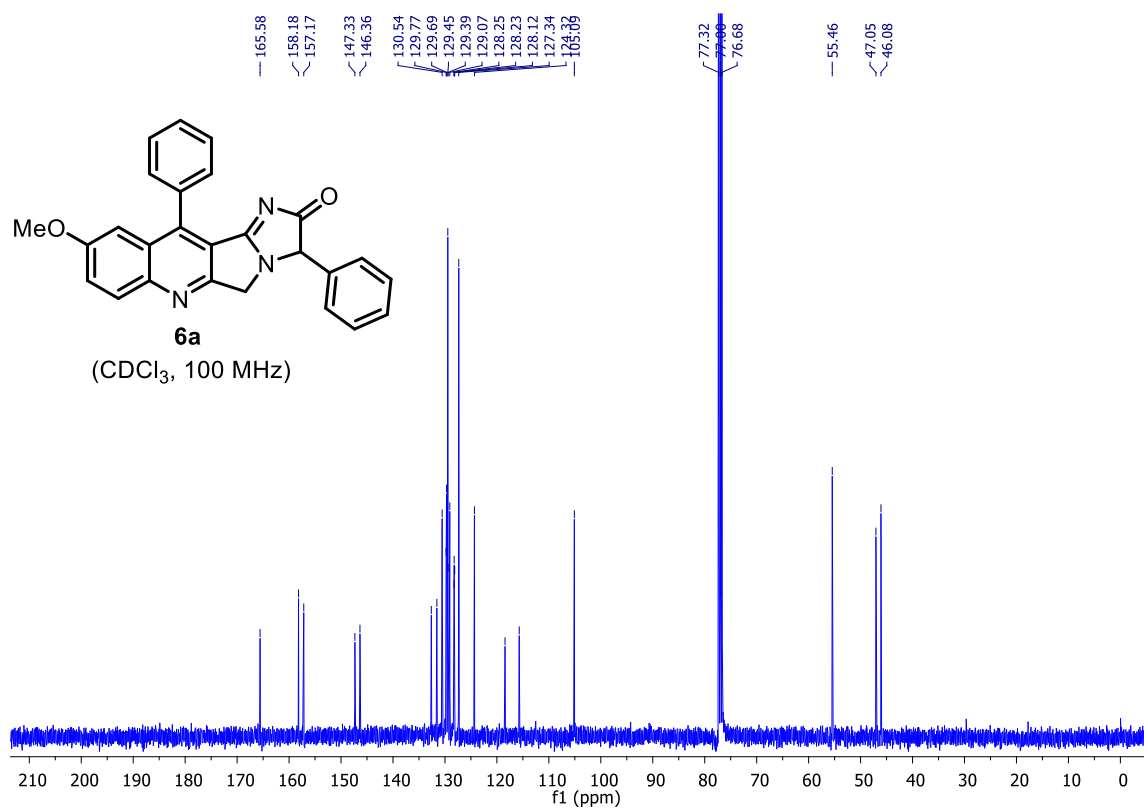

**Figure S21:**  $^1\text{H}$  NMR of compound **6b**

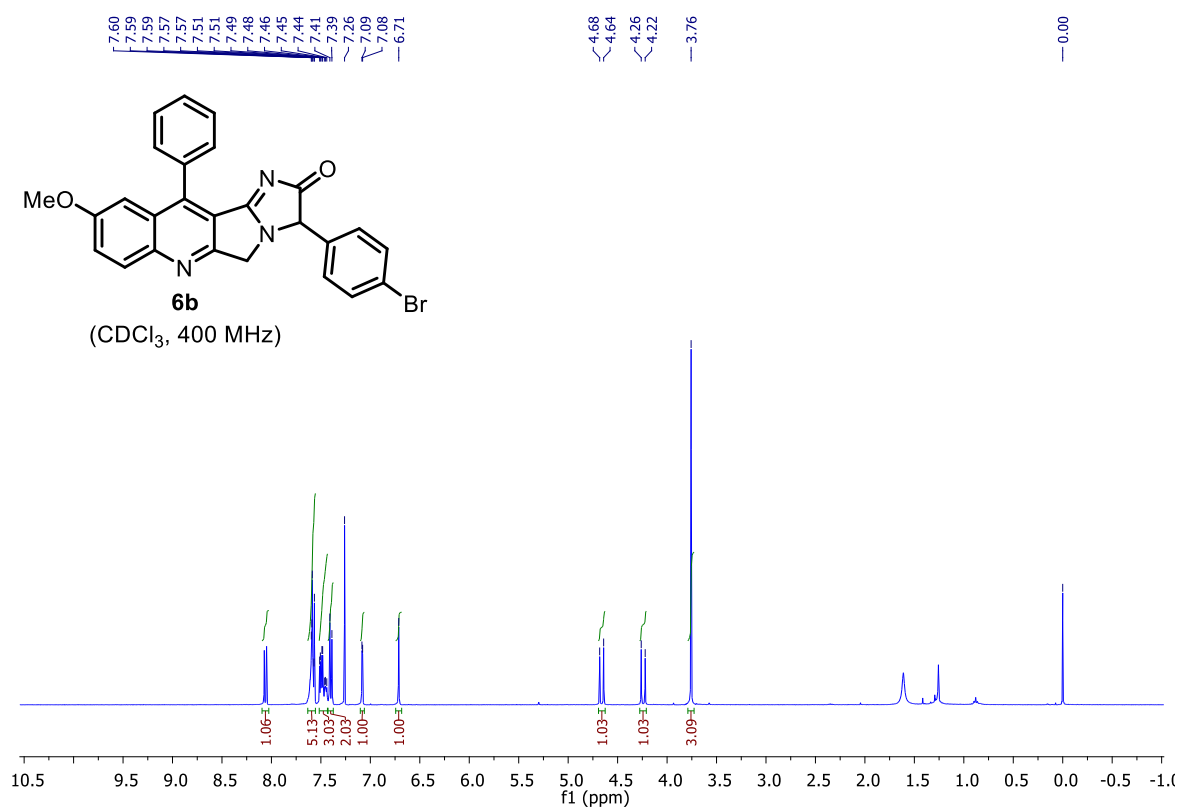

**Figure S22:**  $^{13}\text{C}$  NMR of compound **6b**

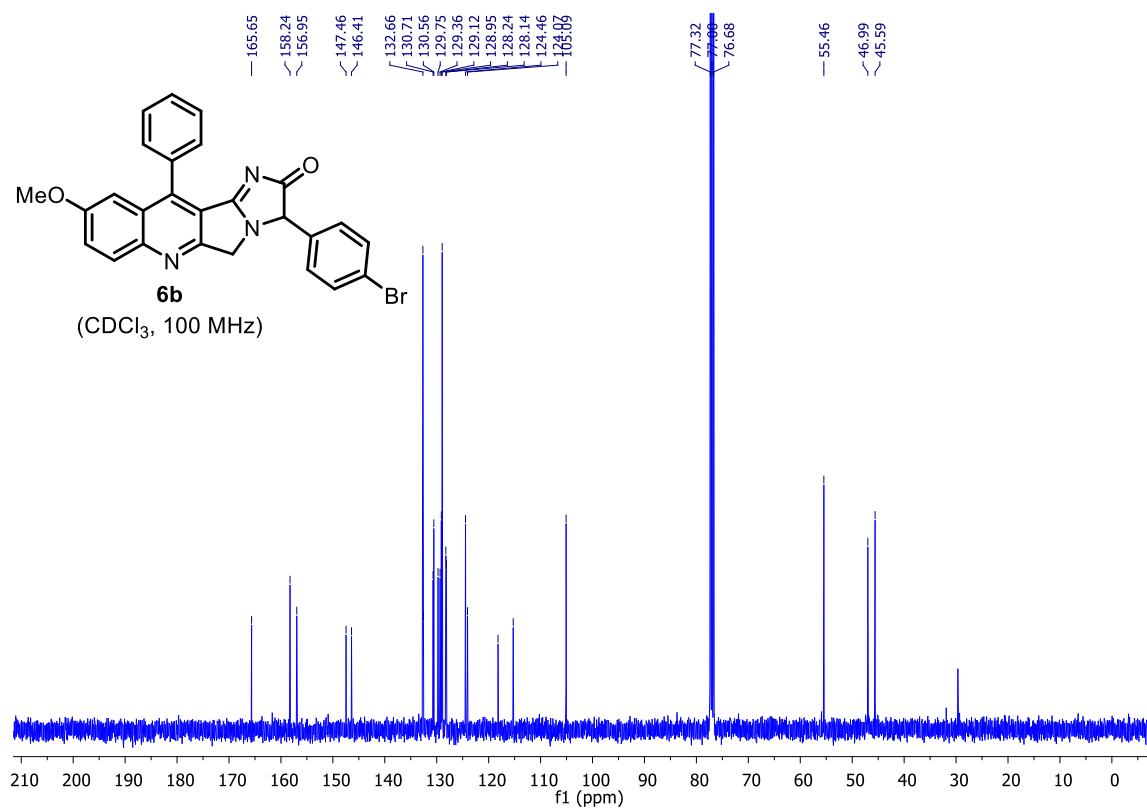



**Figure S23:**  $^1\text{H}$  NMR of compound **6c**

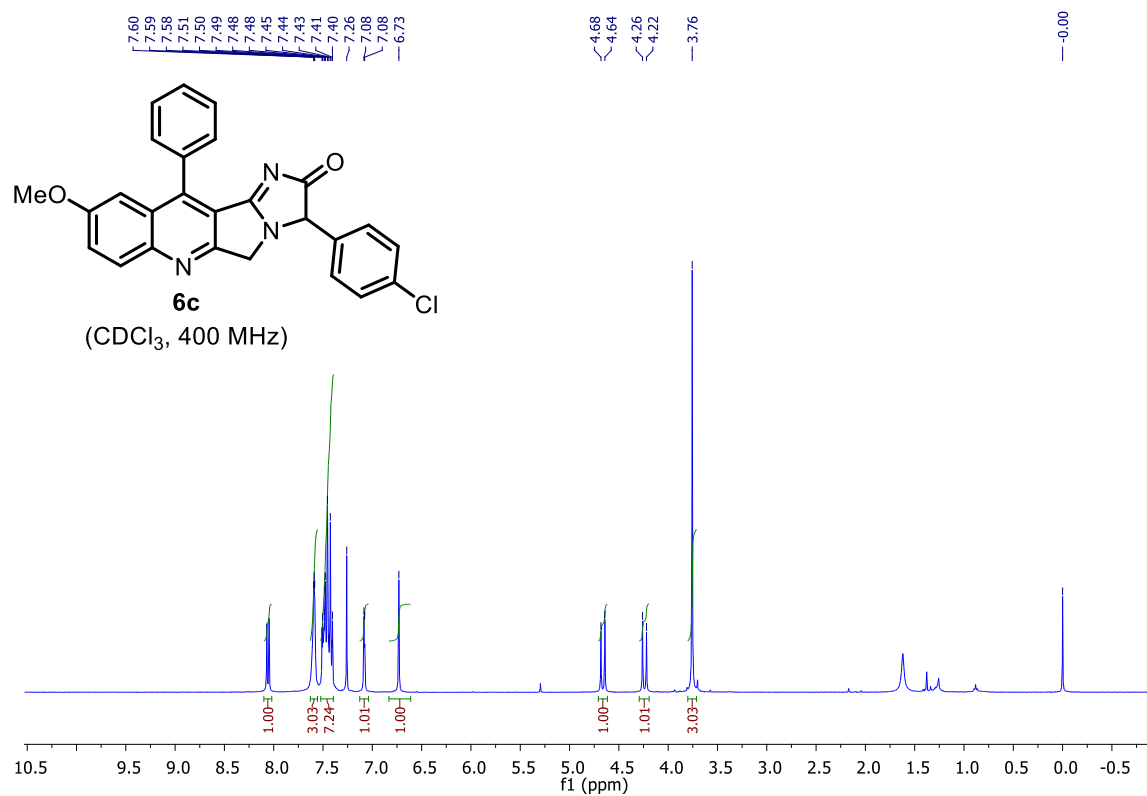

**Figure S24:**  $^{13}\text{C}$  NMR of compound **6c**

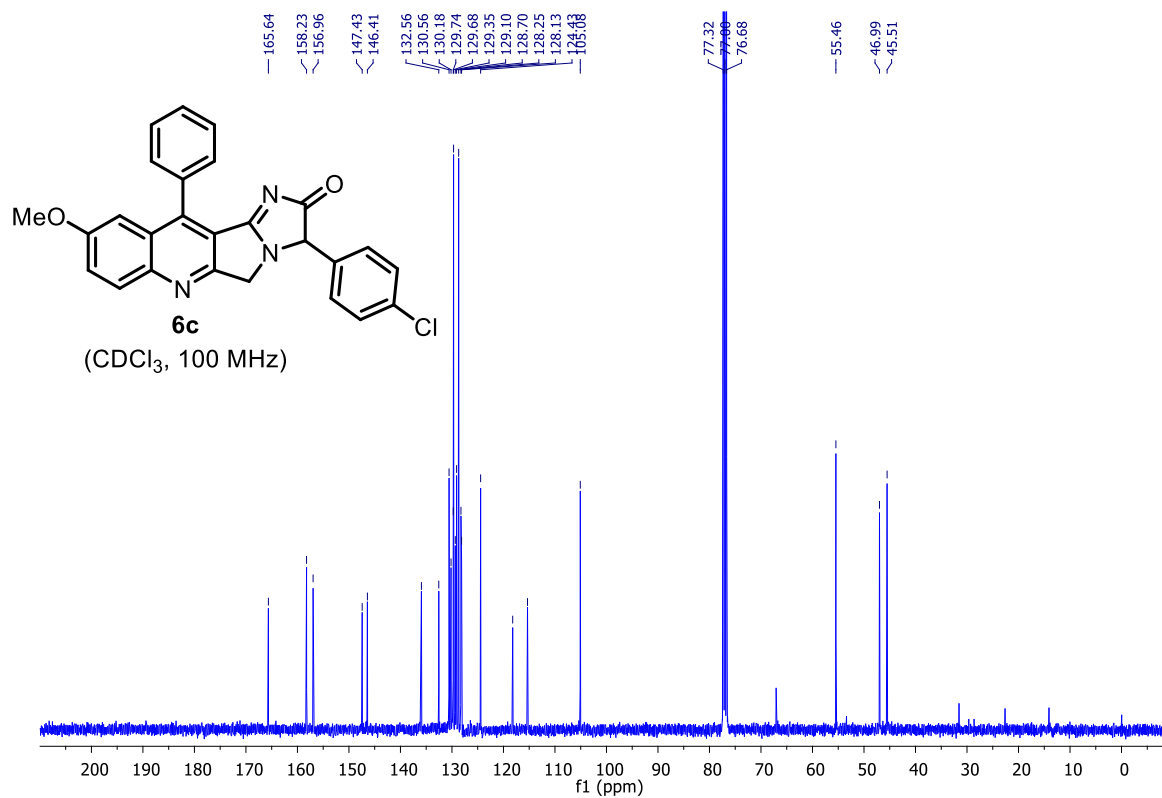

Figure S25:  $^1\text{H}$  NMR of compound **6d**

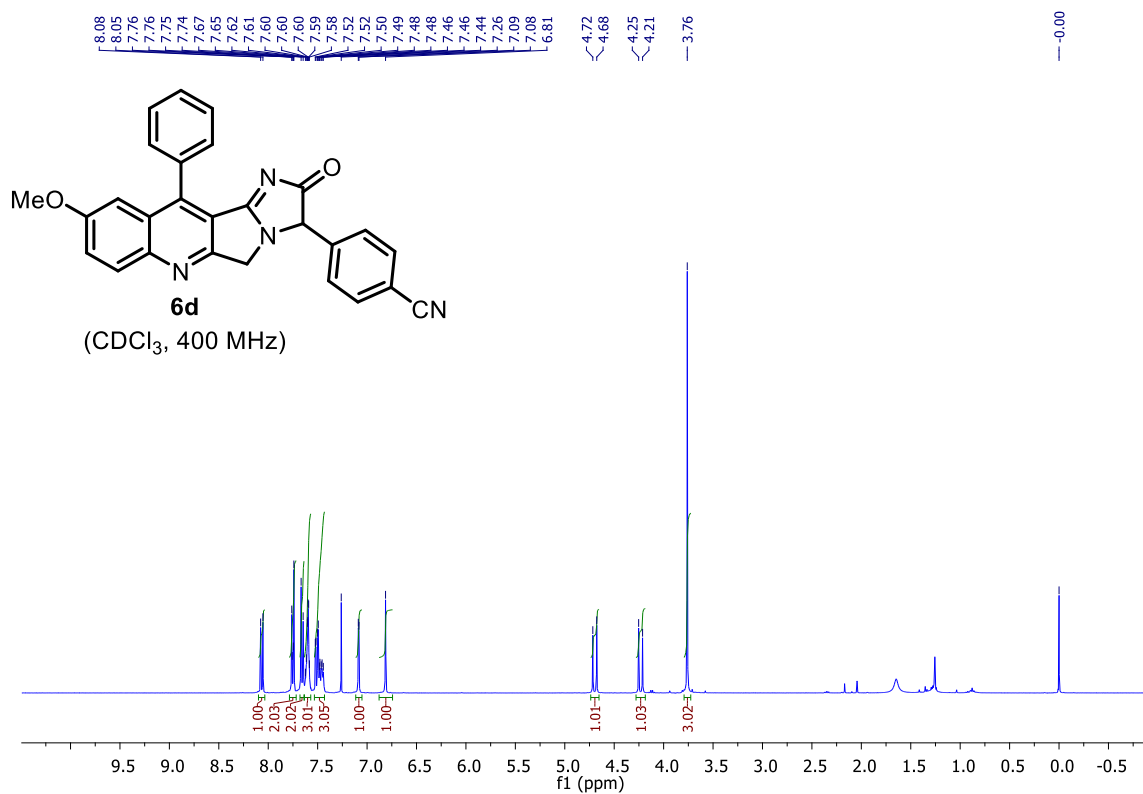

Figure S26:  $^{13}\text{C}$  NMR of compound **6d**

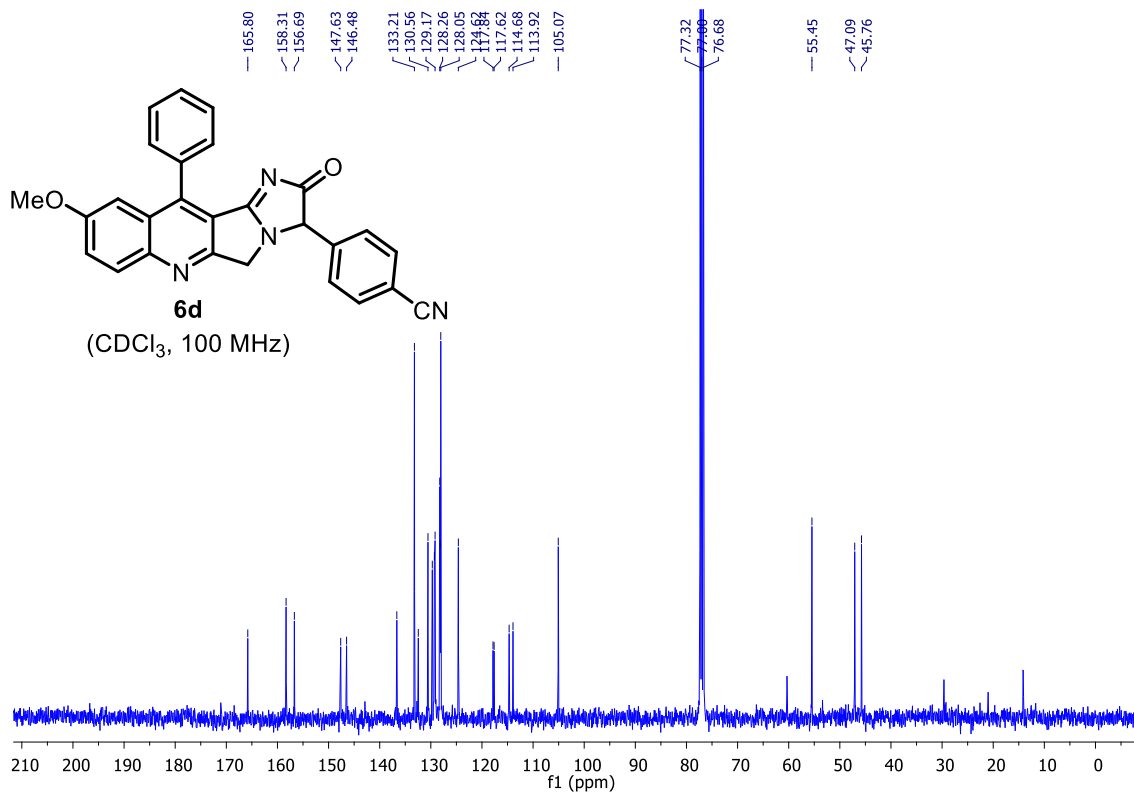

Figure S27:  $^1\text{H}$  NMR of compound **6e**

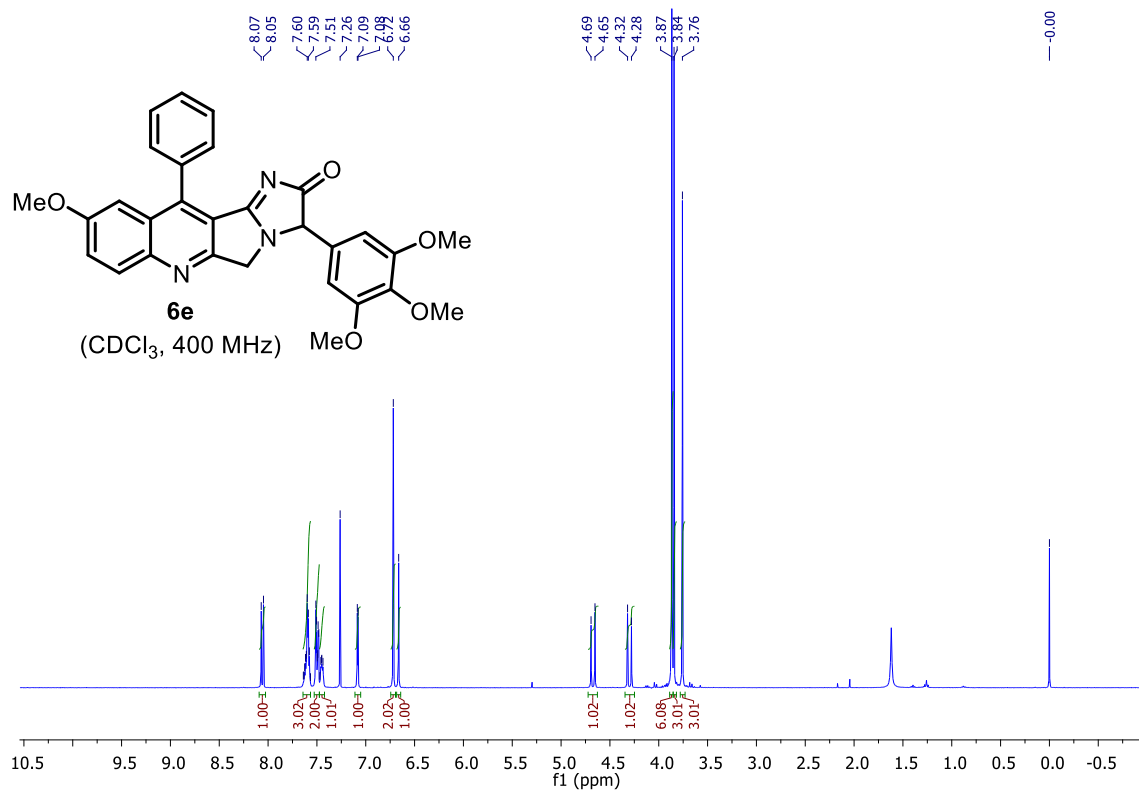

Figure S28:  $^{13}\text{C}$  NMR of compound **6e**

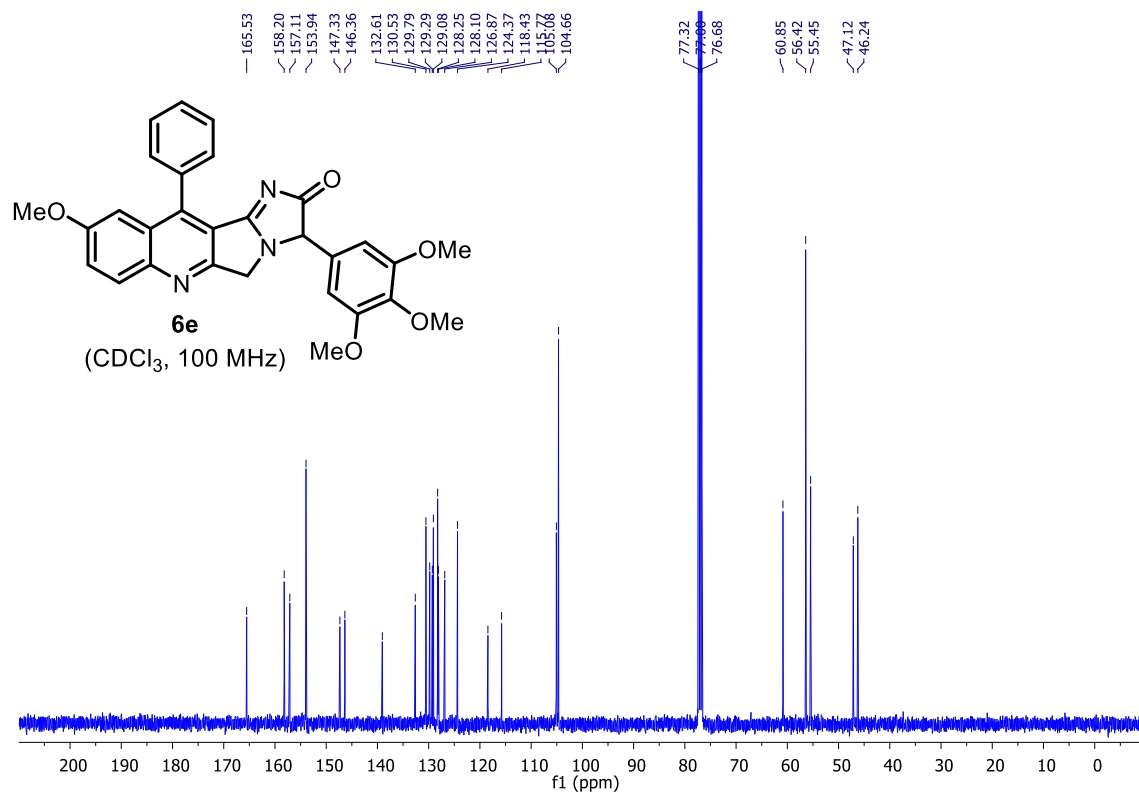

Figure S29:  $^1\text{H}$  NMR of compound **6f**

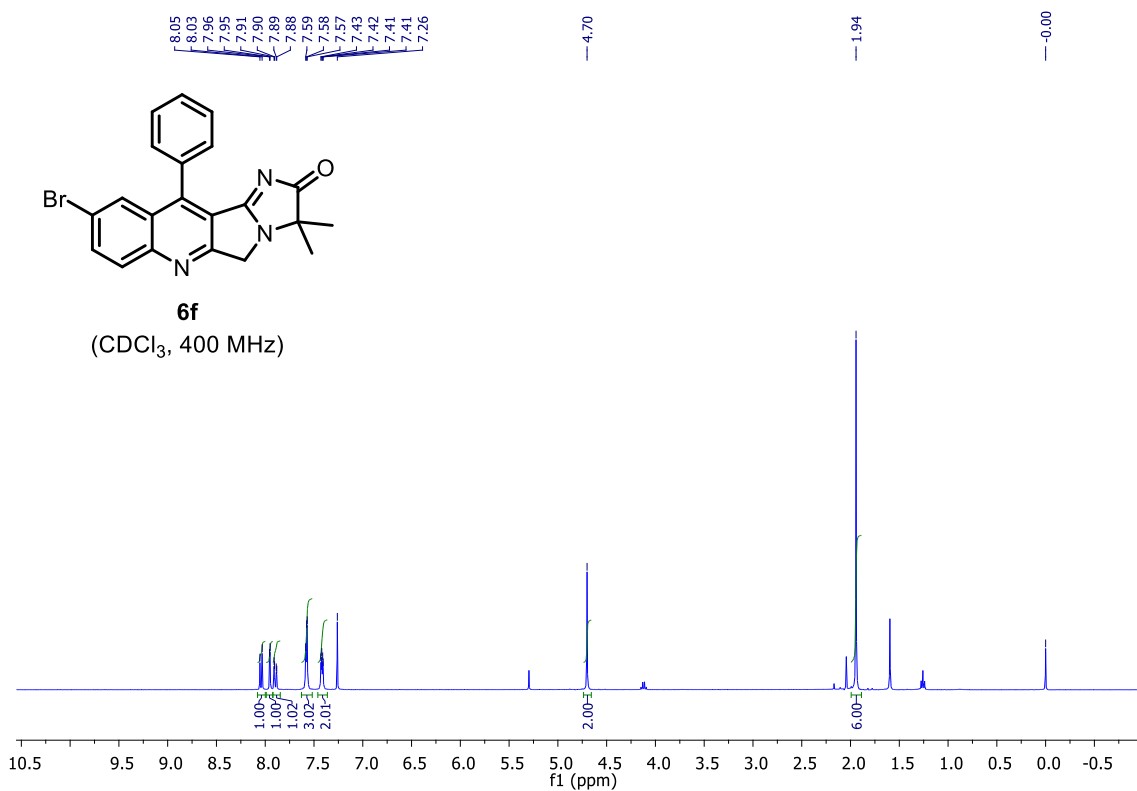

Figure S30:  $^{13}\text{C}$  NMR of compound **6f**

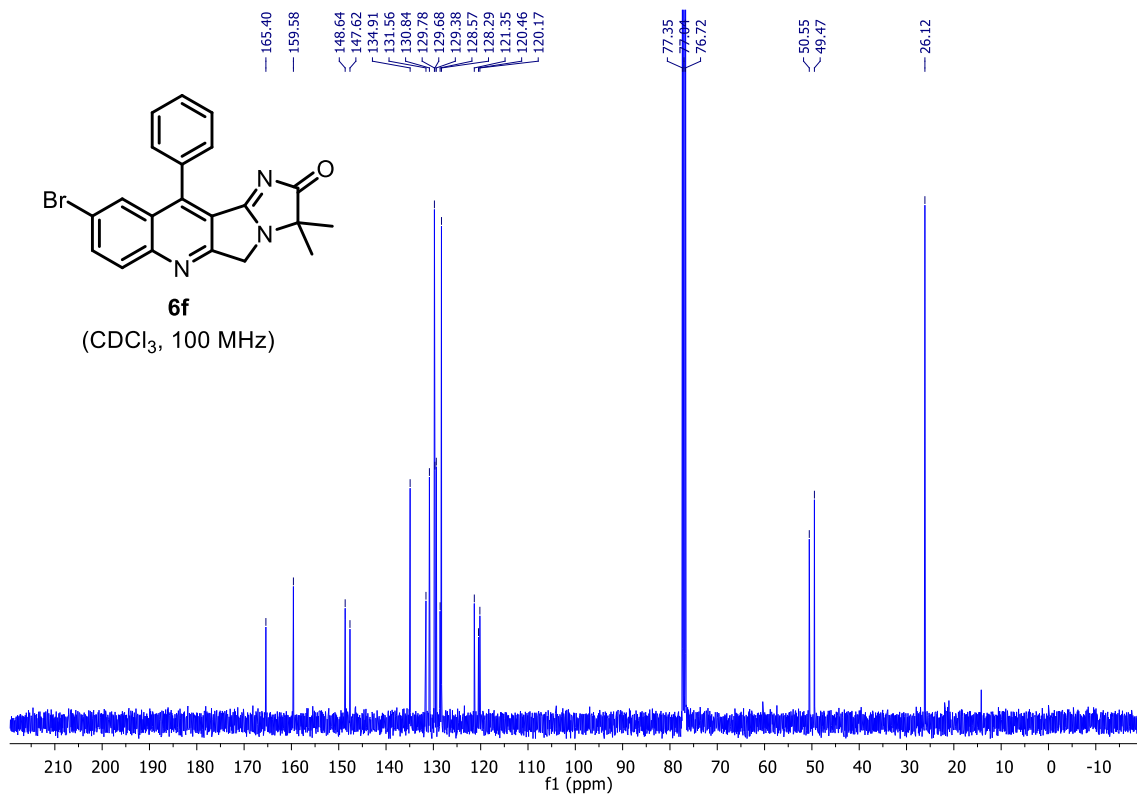

**Figure S31:**  $^1\text{H}$  NMR of compound **6g**

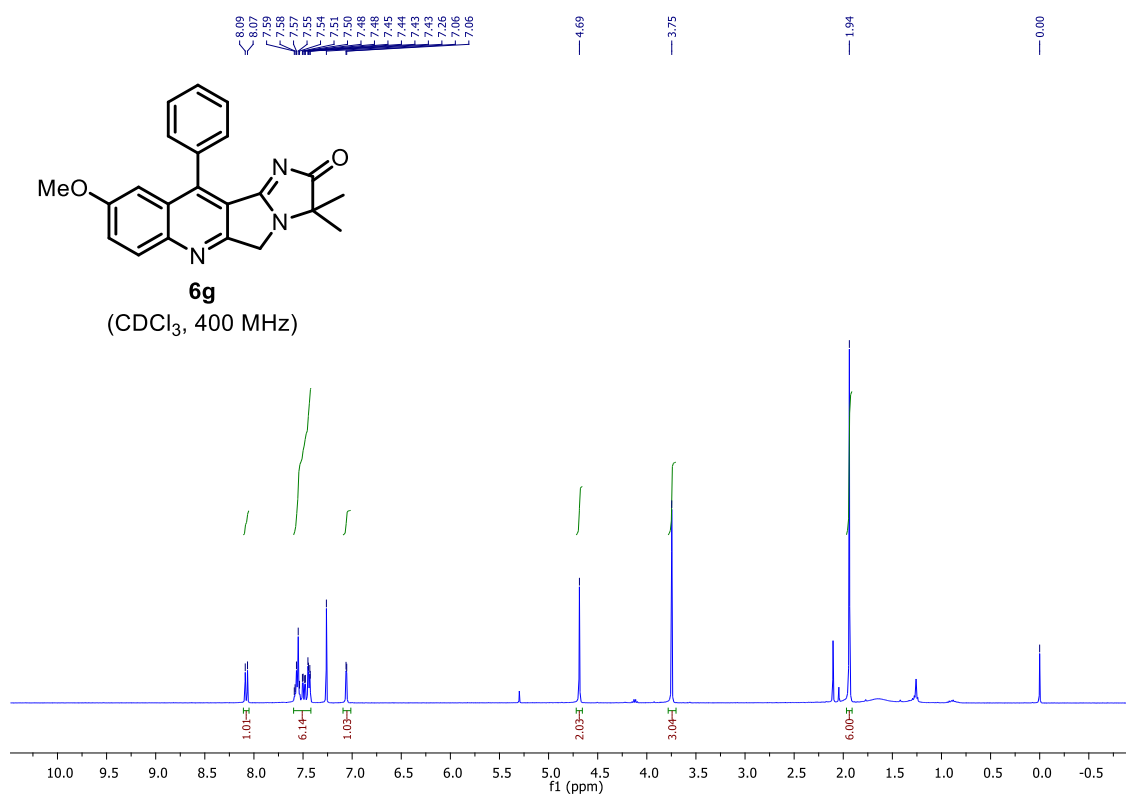

**Figure S32:**  $^{13}\text{C}$  NMR of compound **6g**

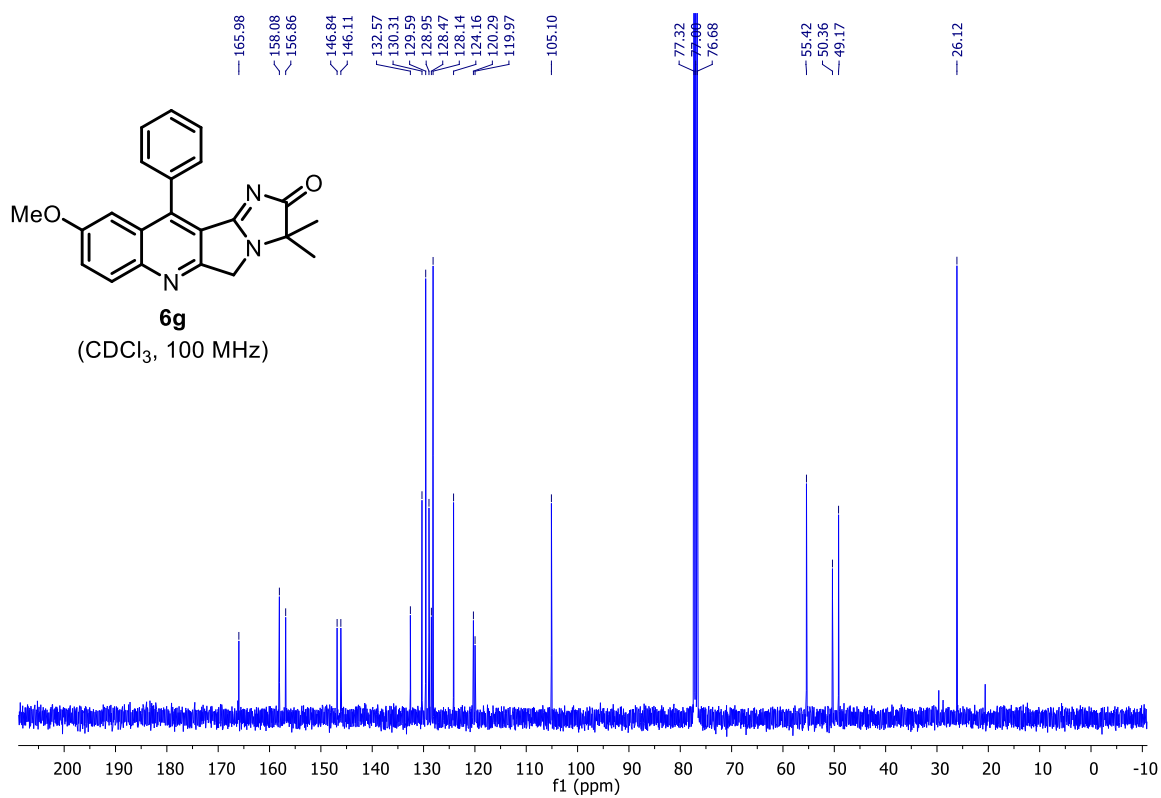

**Figure S33:**  $^1\text{H}$  NMR of compound **6h**

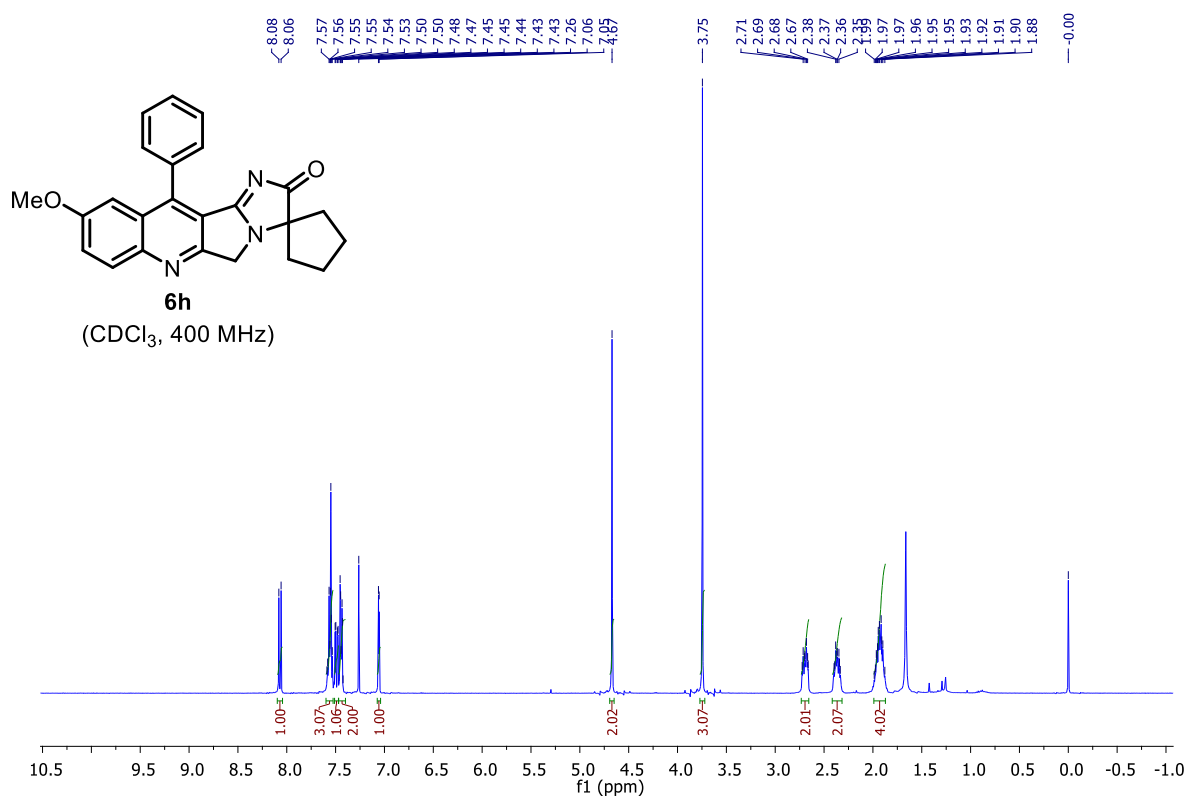

**Figure S34:**  $^{13}\text{C}$  NMR of compound **6h**

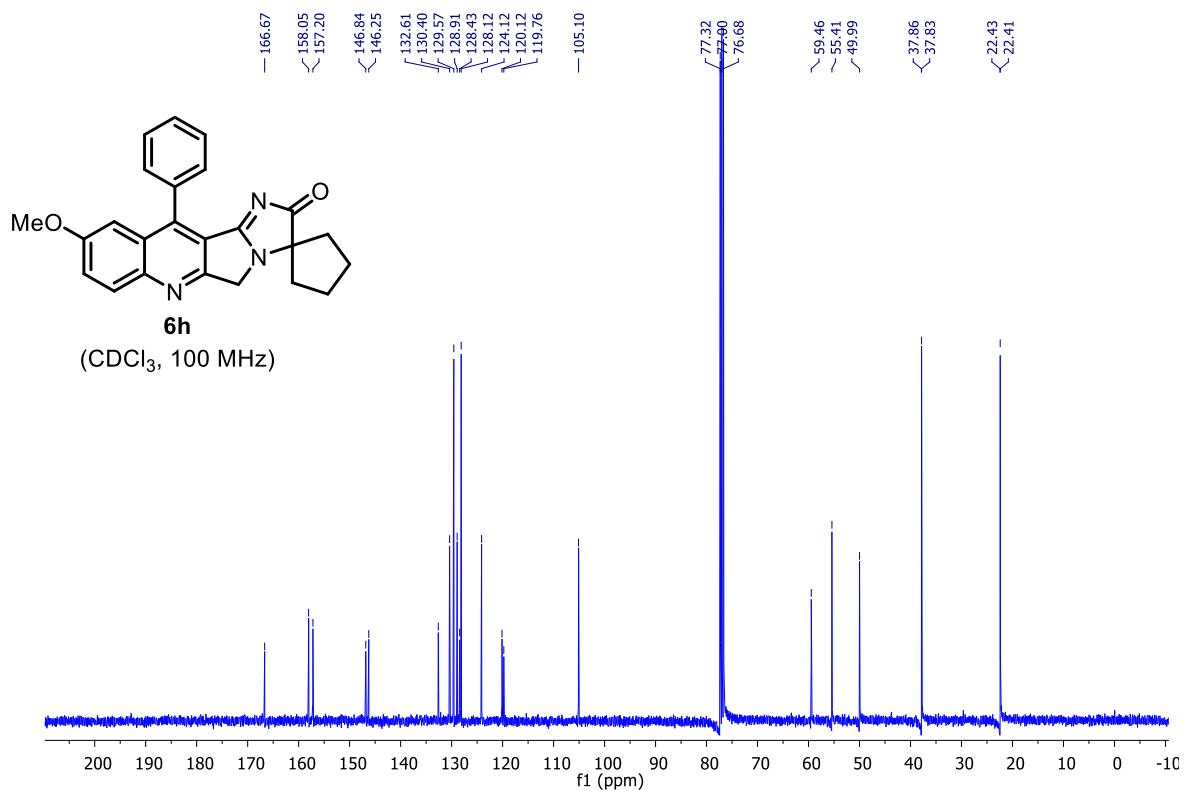

Figure S35:  $^1\text{H}$  NMR of compound **6i**

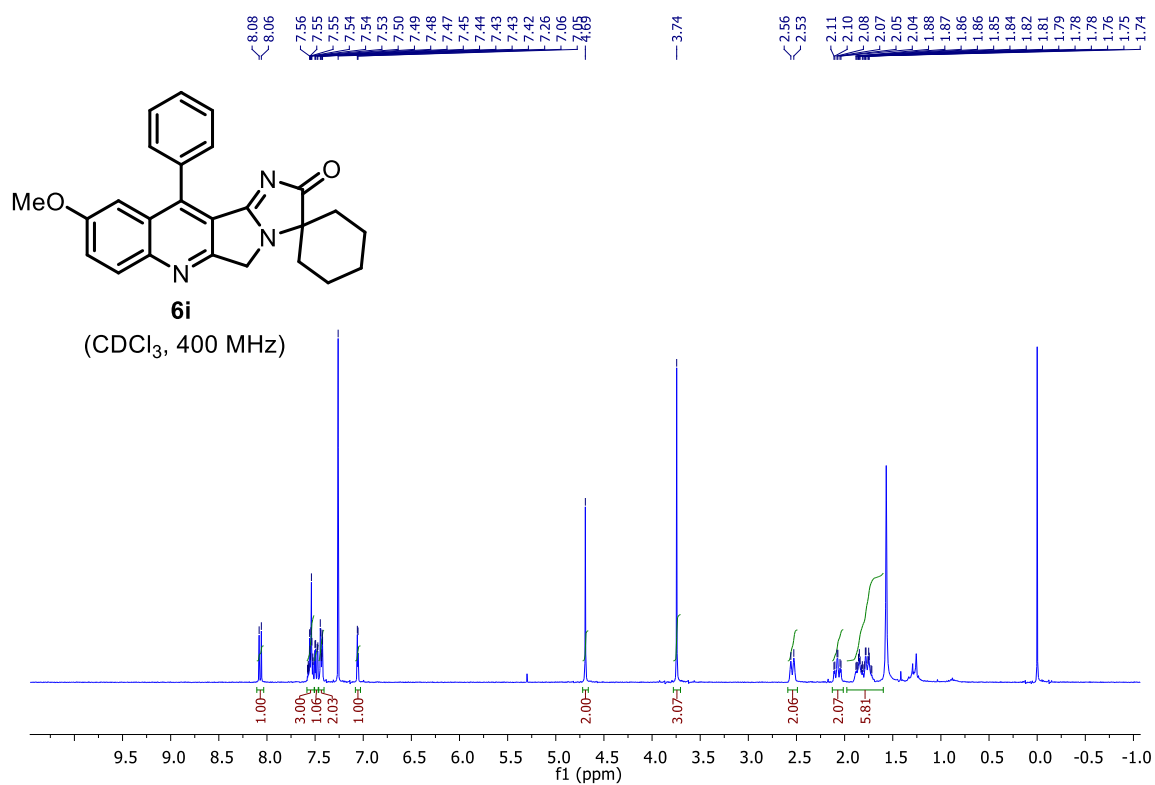

Figure S36:  $^{13}\text{C}$  NMR of compound **6i**

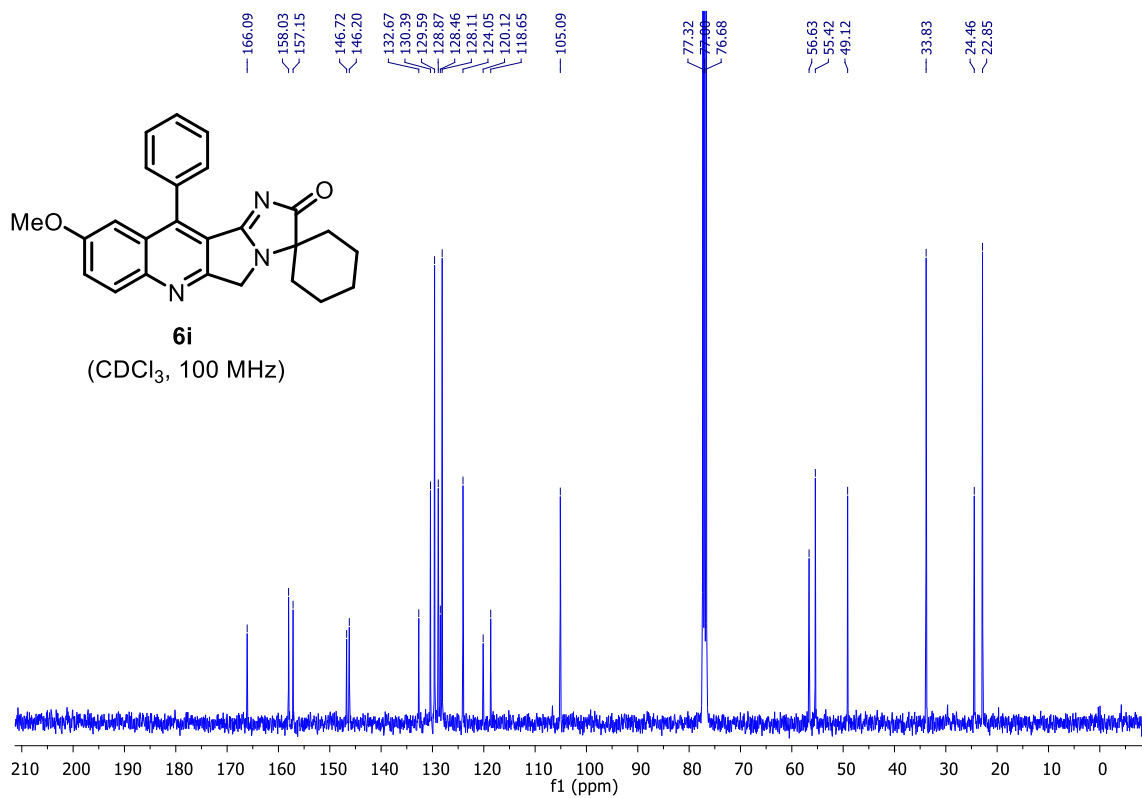

Figure S37: <sup>1</sup>H NMR of compound 7a

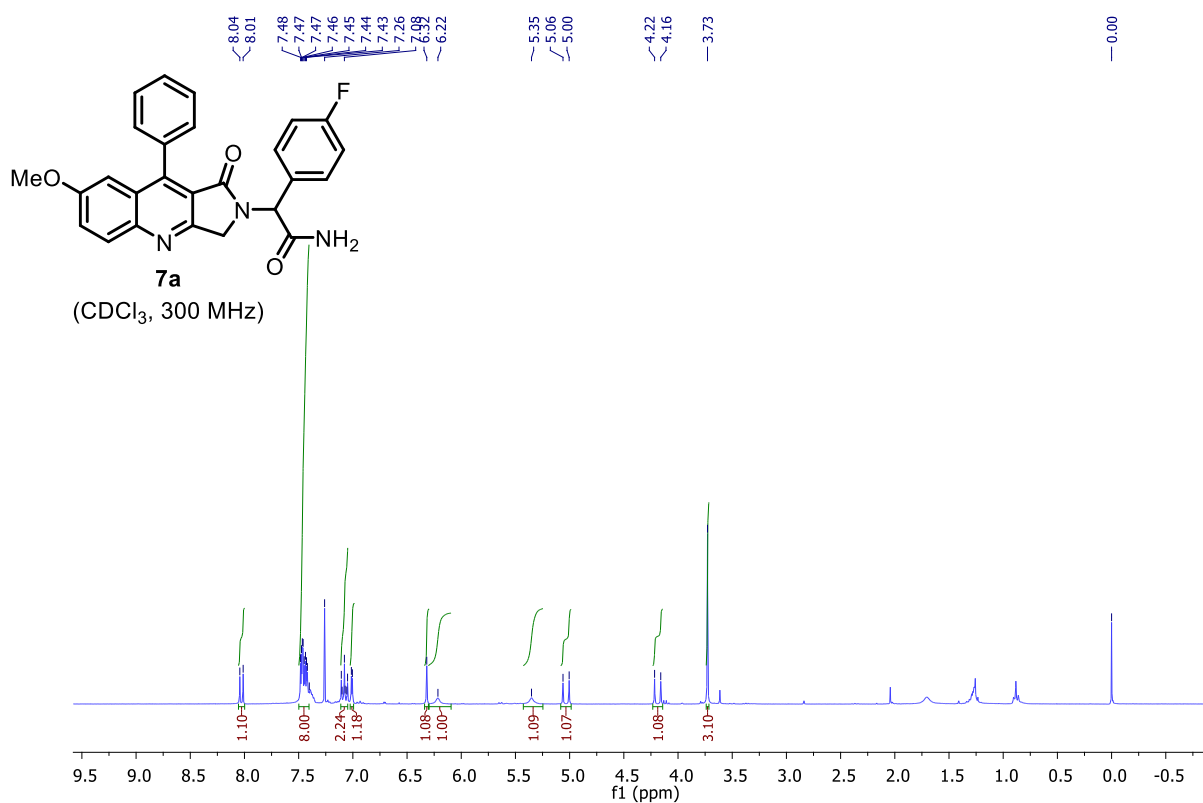

Figure S38: <sup>13</sup>C NMR of compound 7a

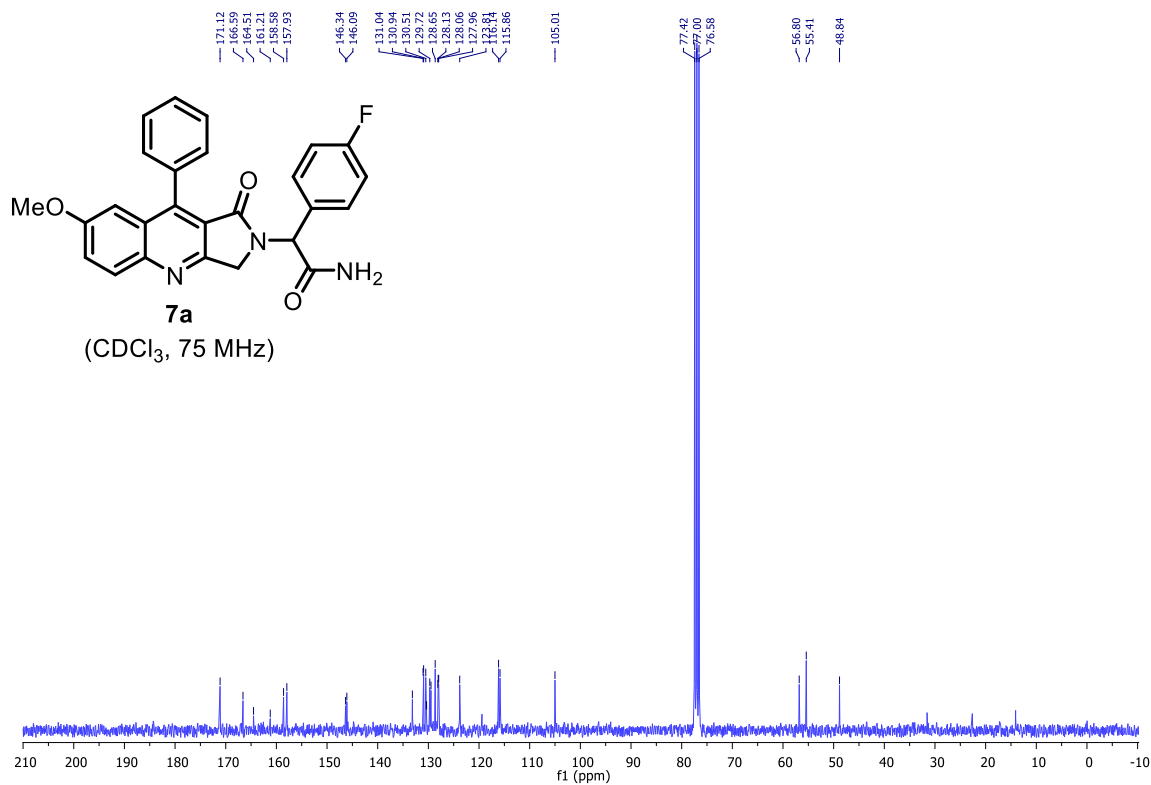



**Figure S39:**  $^{19}\text{F}$  NMR of compound **7a**

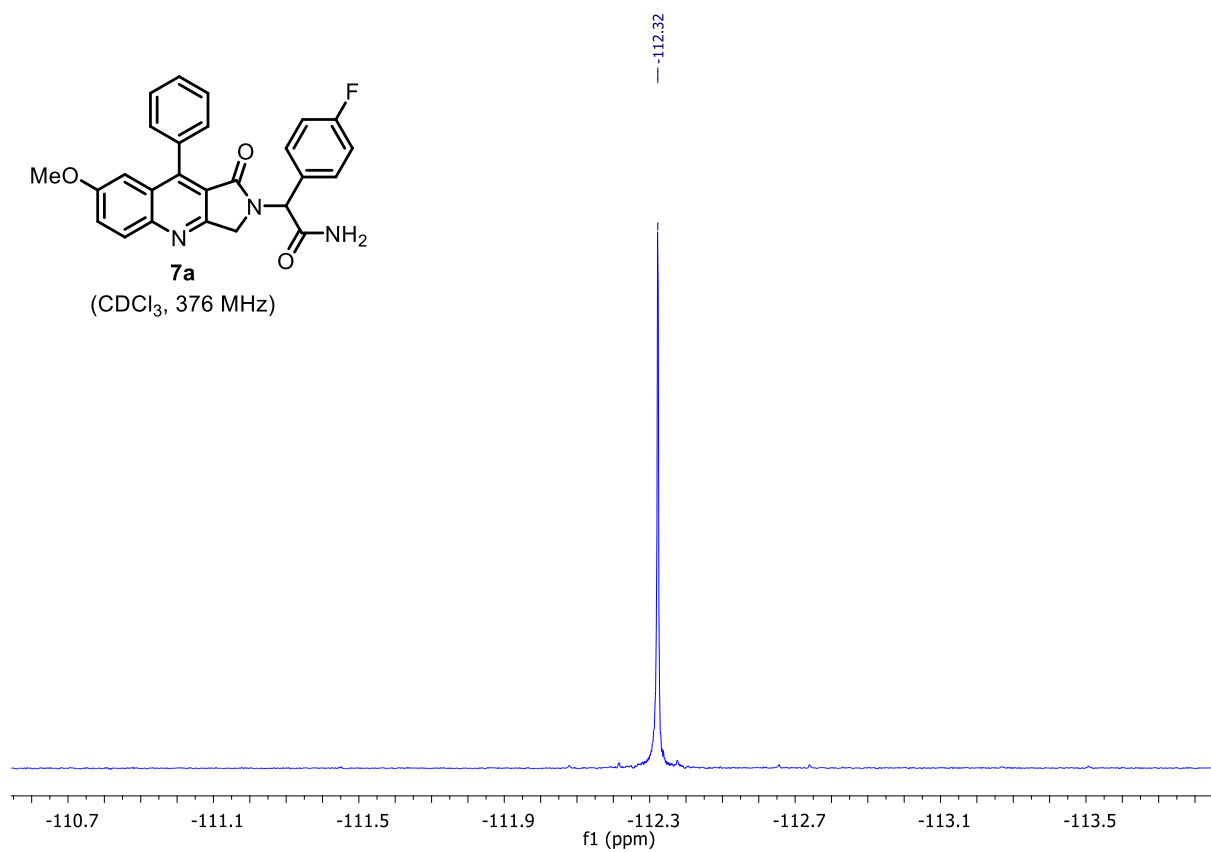

**Figure S40:**  $^1\text{H}$  NMR of compound **7b**

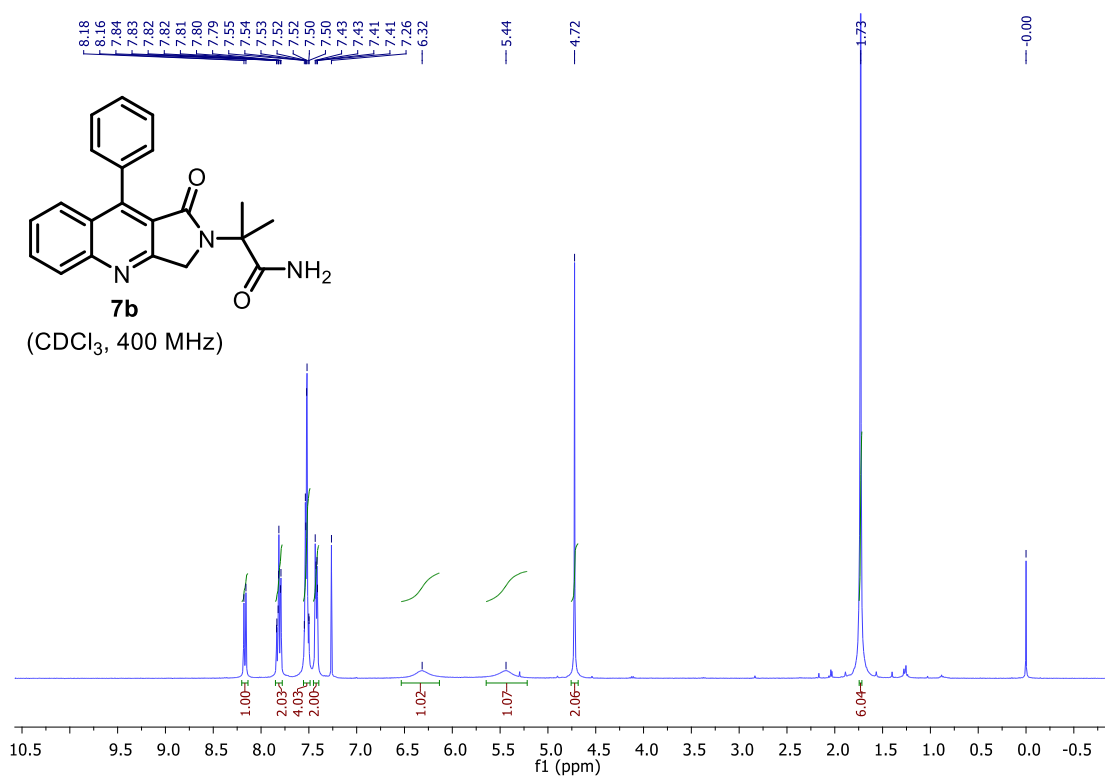

**Figure S41:**  $^{13}\text{C}$  NMR of compound **7b**

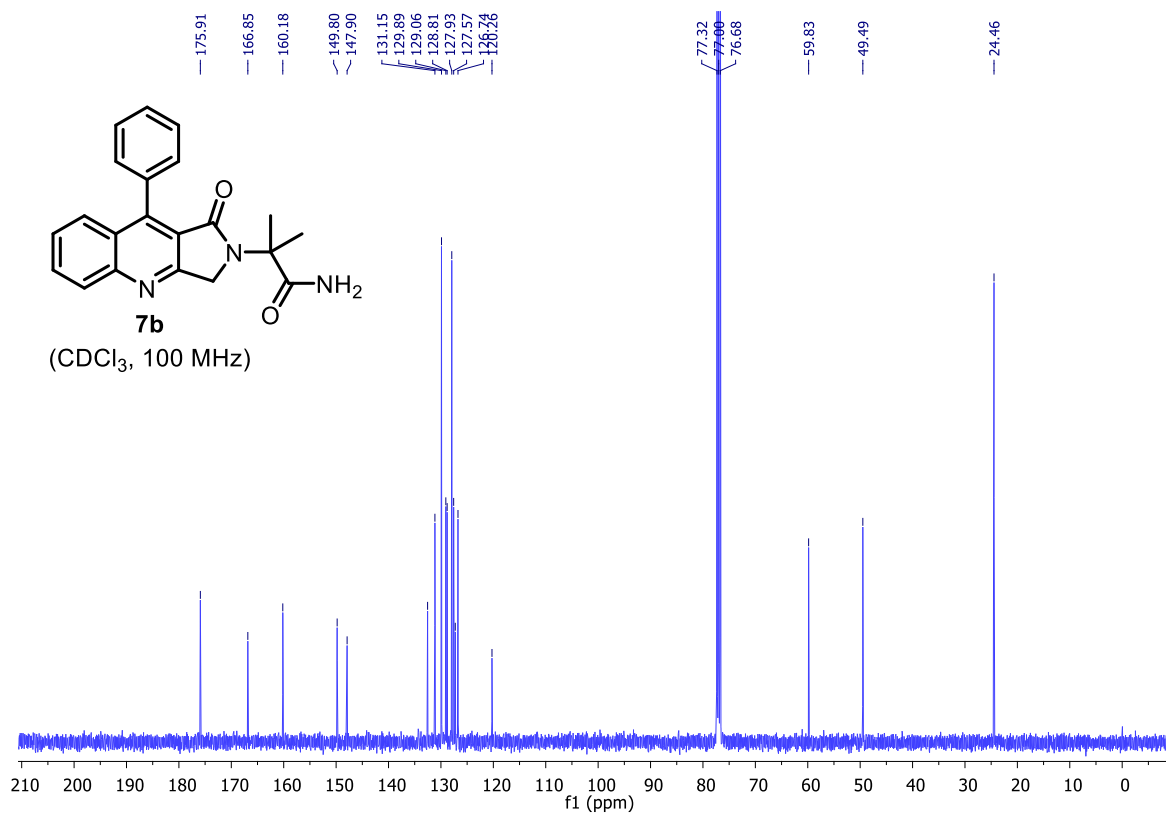

**Figure S42:**  $^1\text{H}$  NMR of compound **7c**

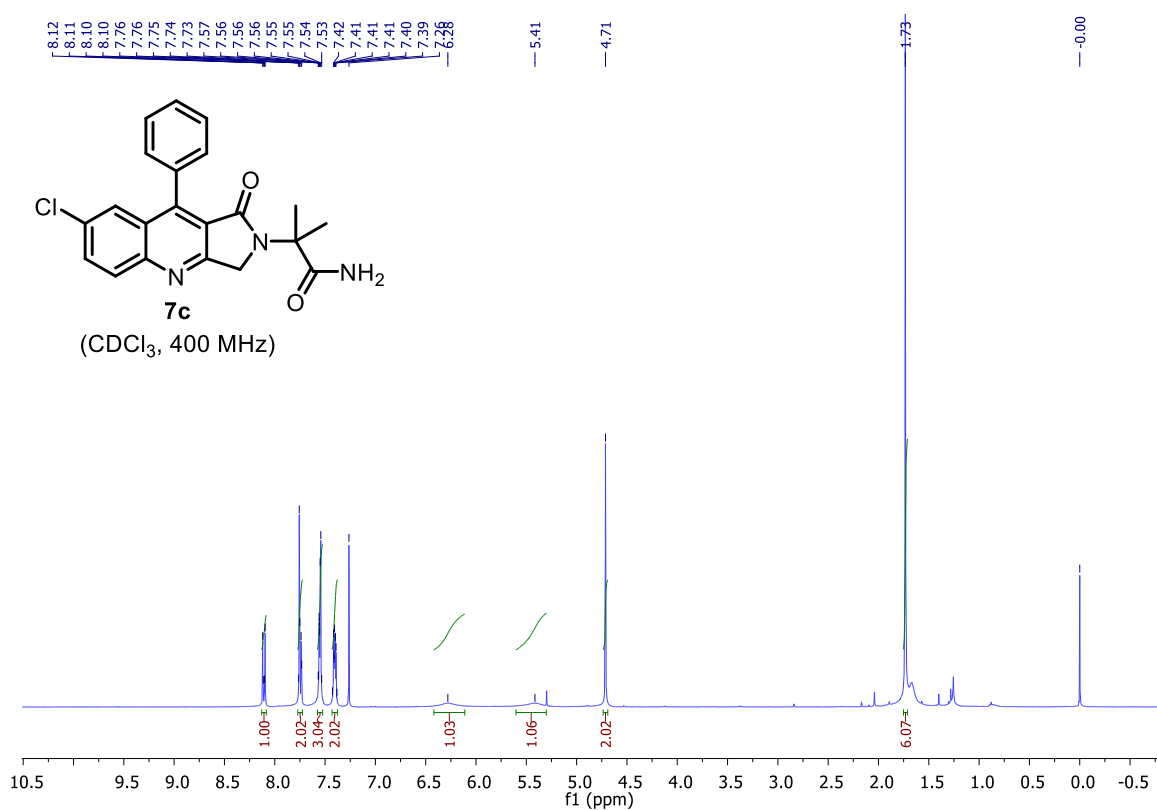

**Figure S43:**  $^{13}\text{C}$  NMR of compound **7c**

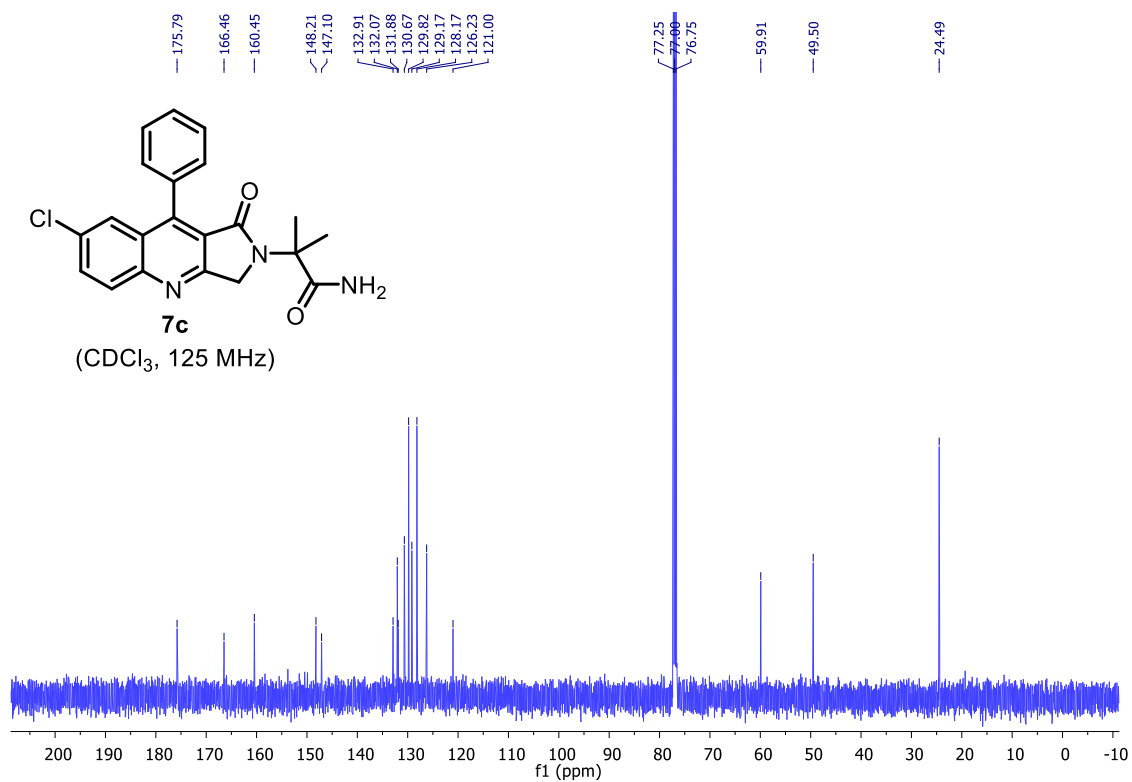

Figure S44:  $^1\text{H}$  NMR of compound **8a**

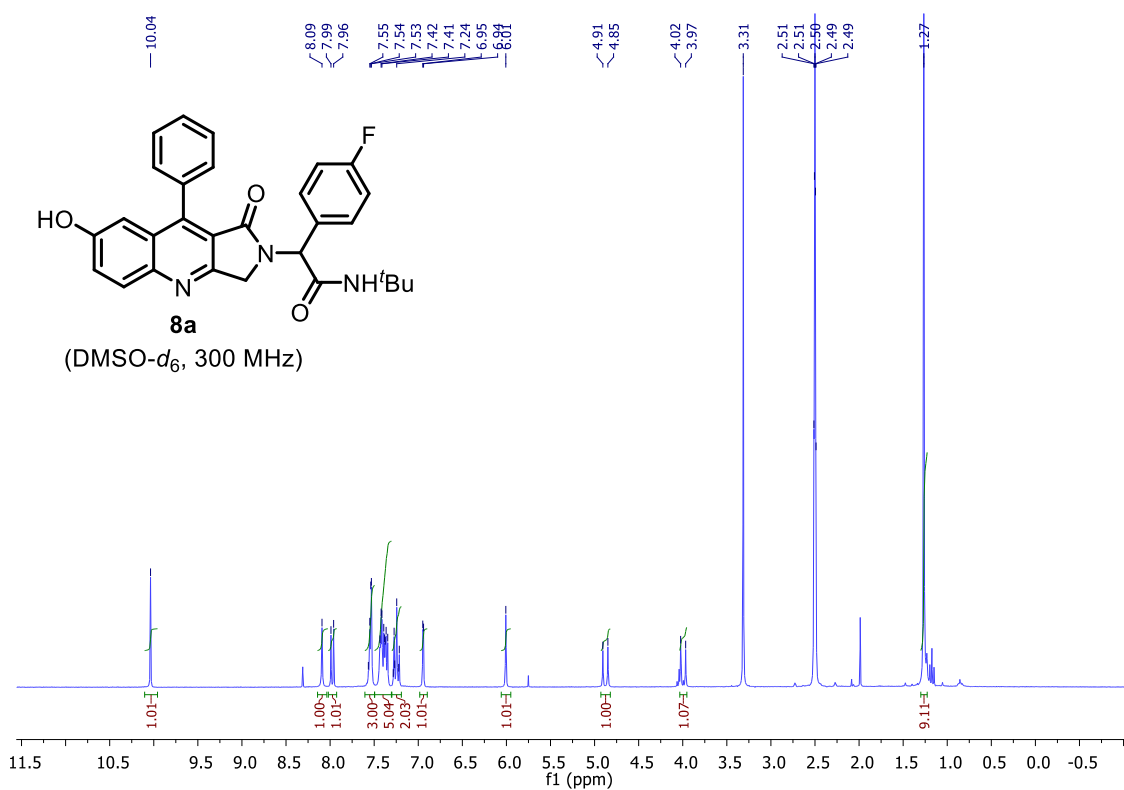

Figure S45:  $^{13}\text{C}$  NMR of compound **8a**

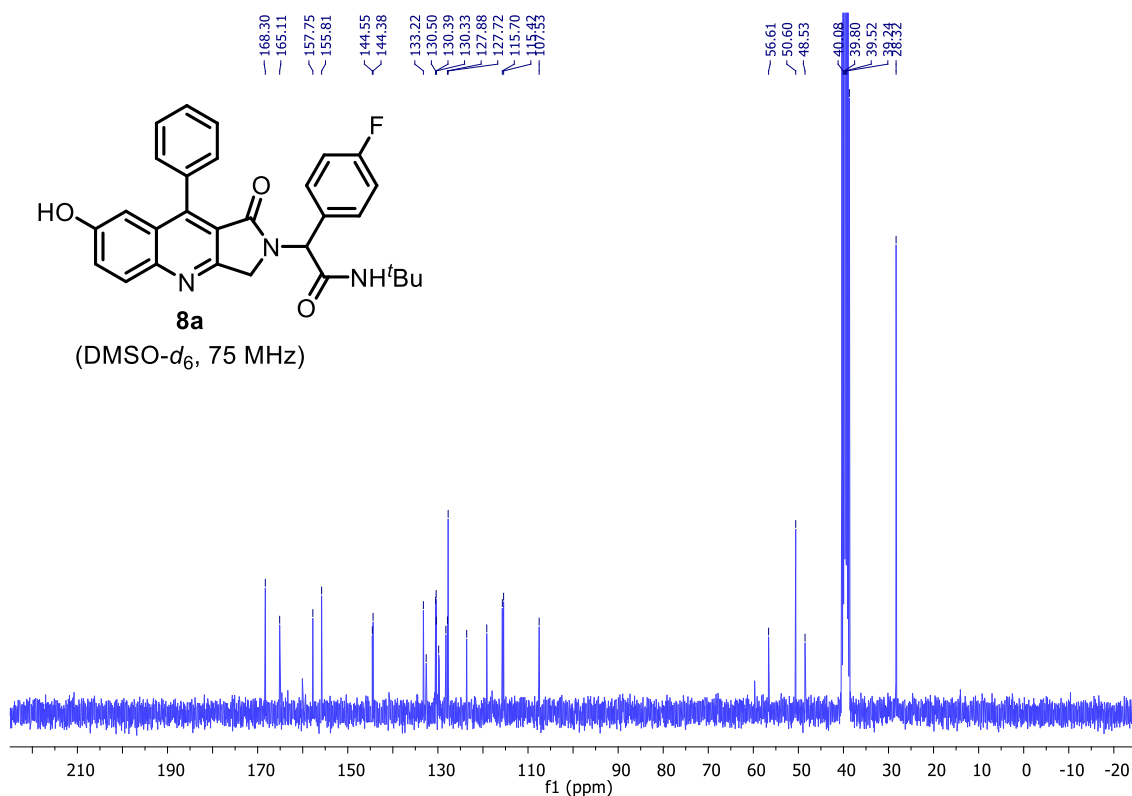

**Figure S46:**  $^{19}\text{F}$  NMR of compound **8a**

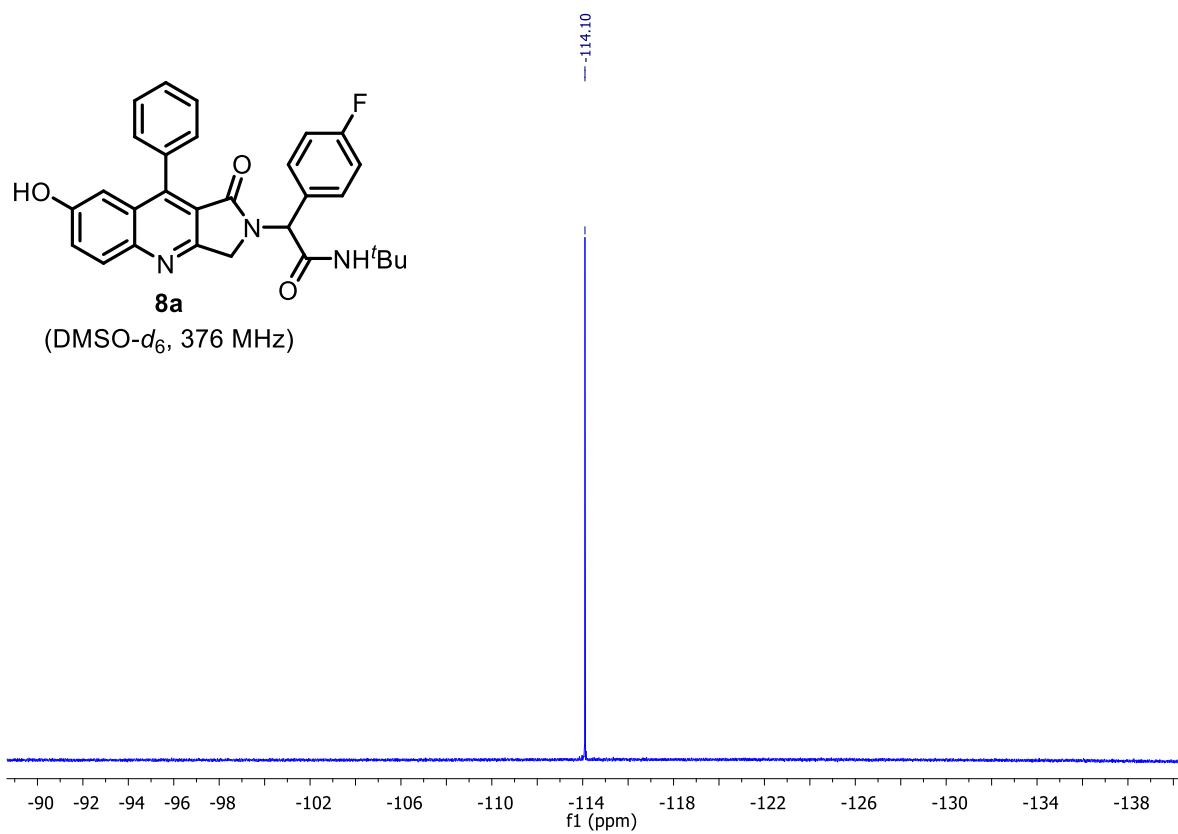

**Figure S47:**  $^1\text{H}$  NMR of compound **8b**

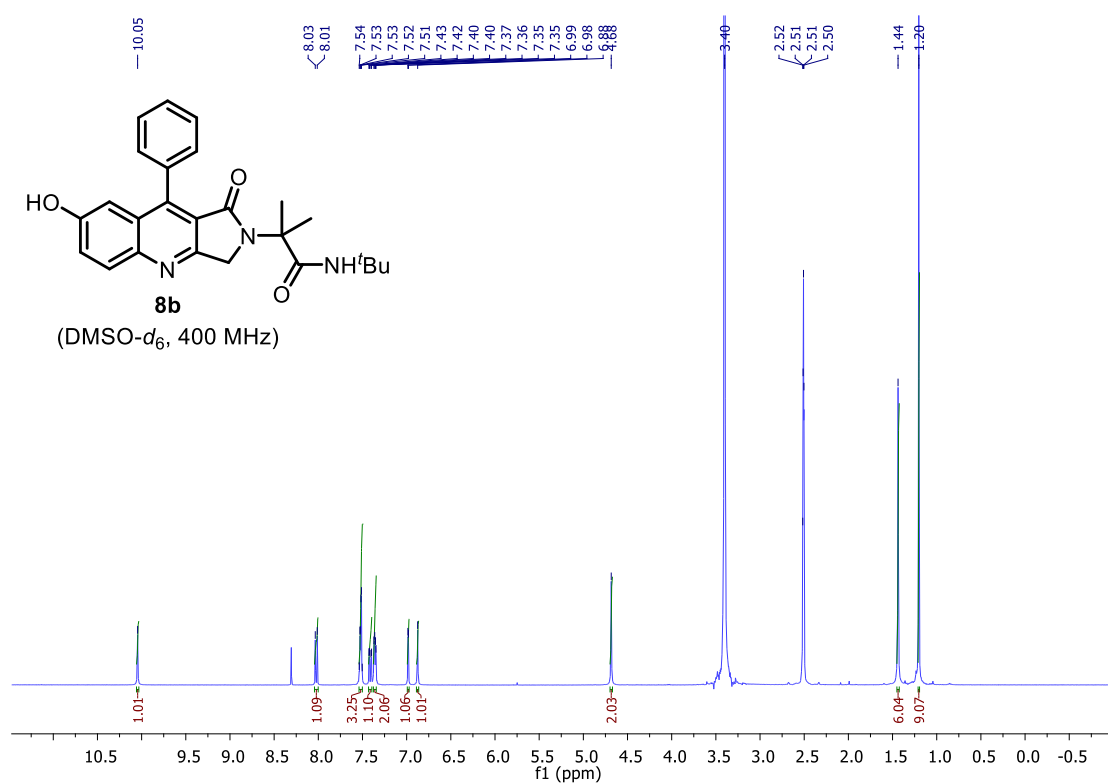

**Figure S48:**  $^{13}\text{C}$  NMR of compound **8b**

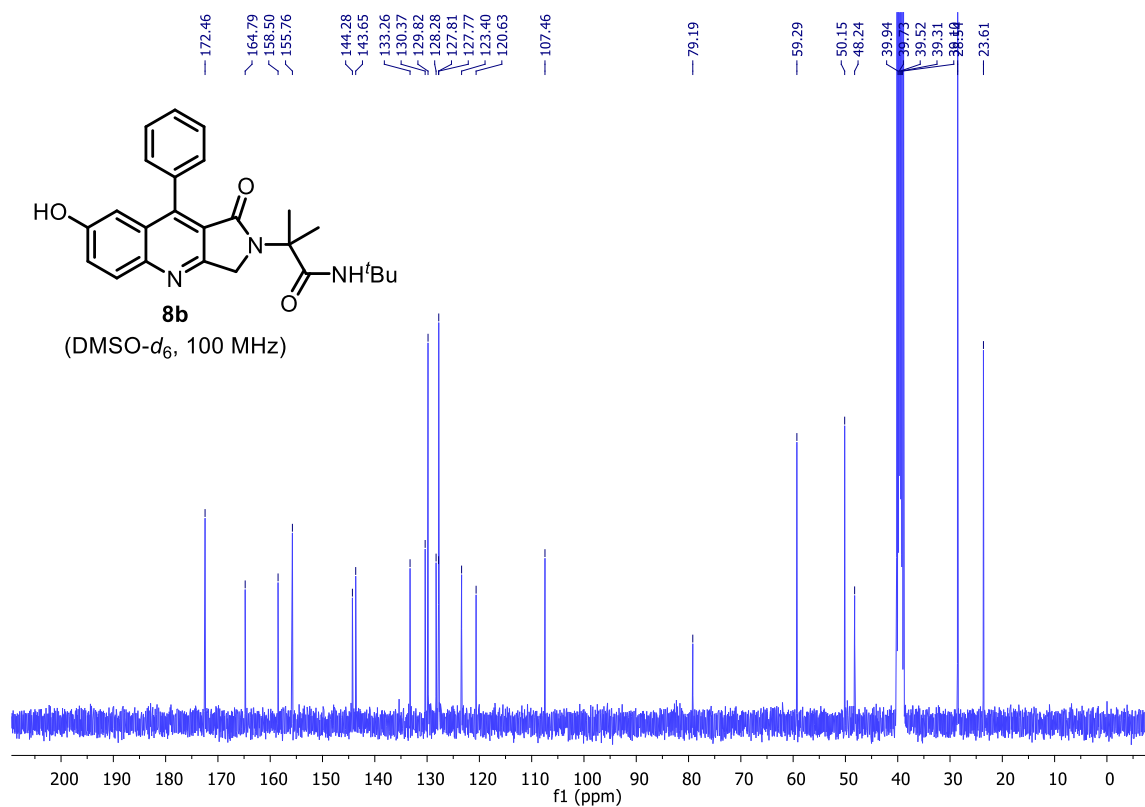

➤ **HRMS Spectra:**

**Figure S49: HRMS Spectrum of compound 5a**

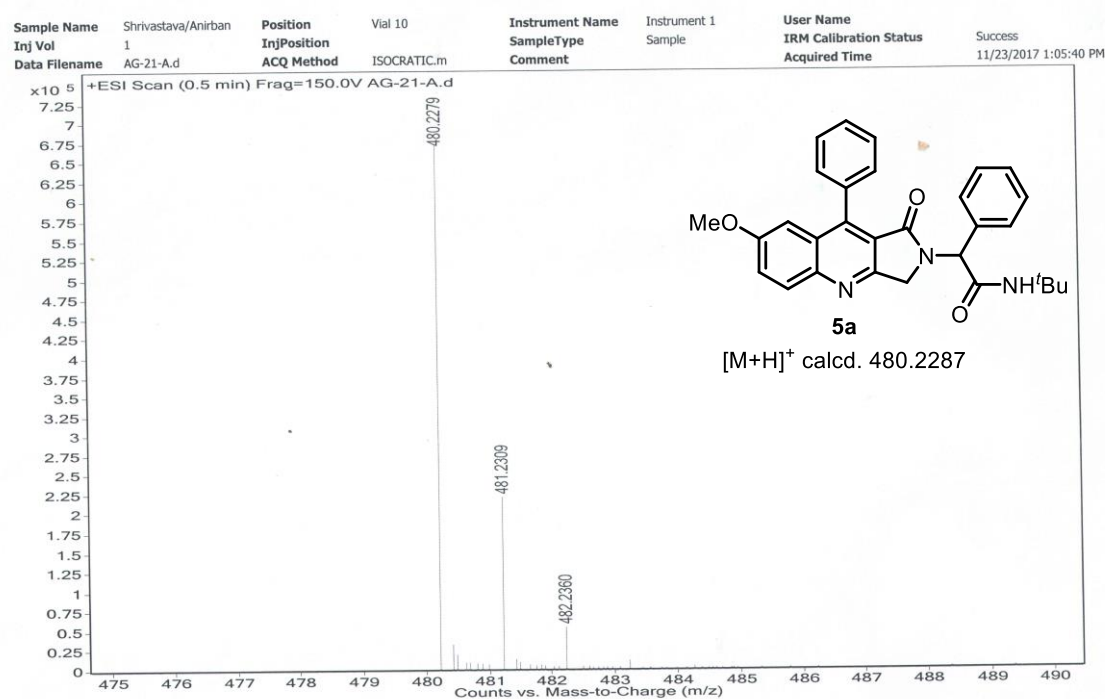

**Figure S50: HRMS Spectrum of compound 5e**

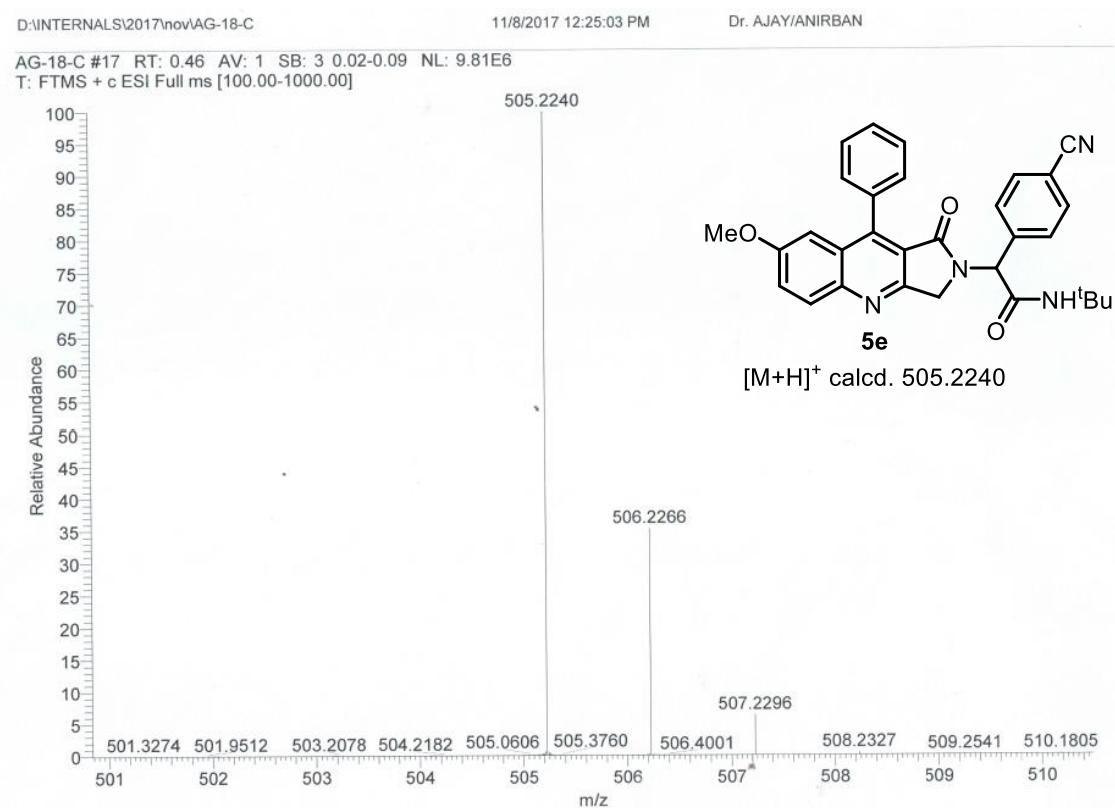

**Figure S51: HRMS Spectrum of compound 5i**

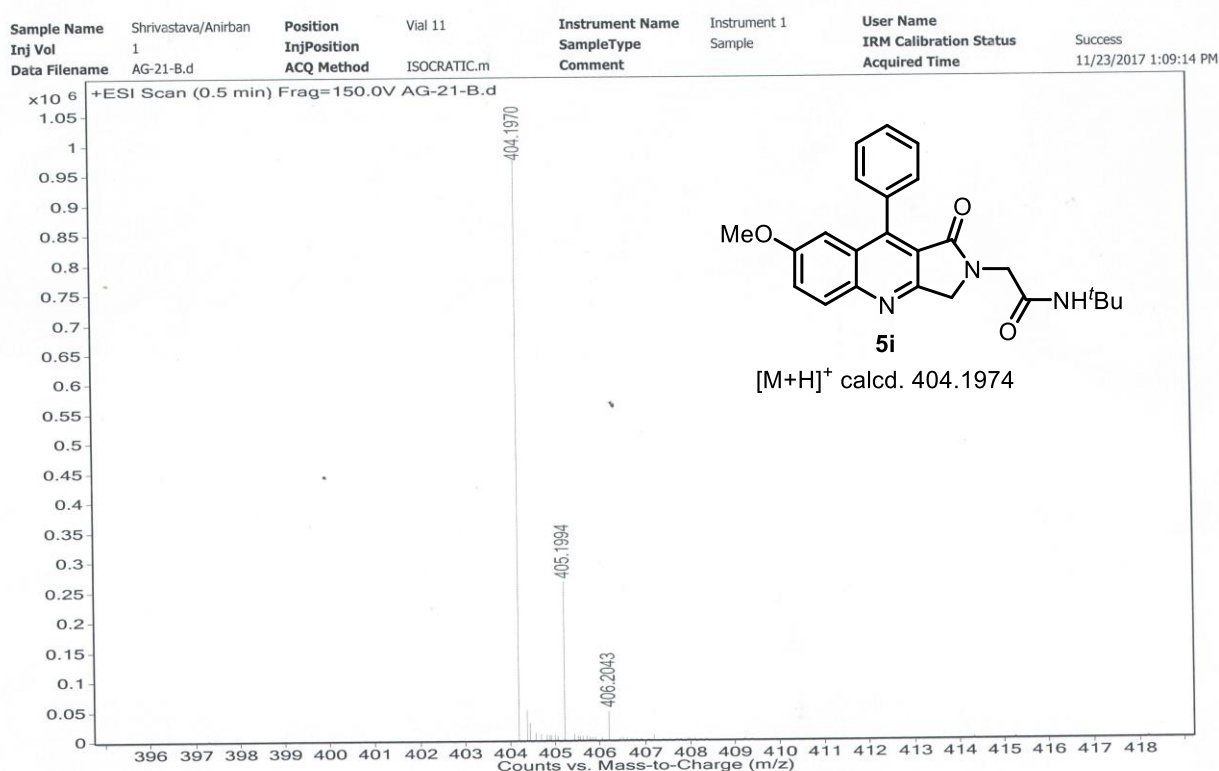

**Figure S52: HRMS Spectrum of compound 5m**

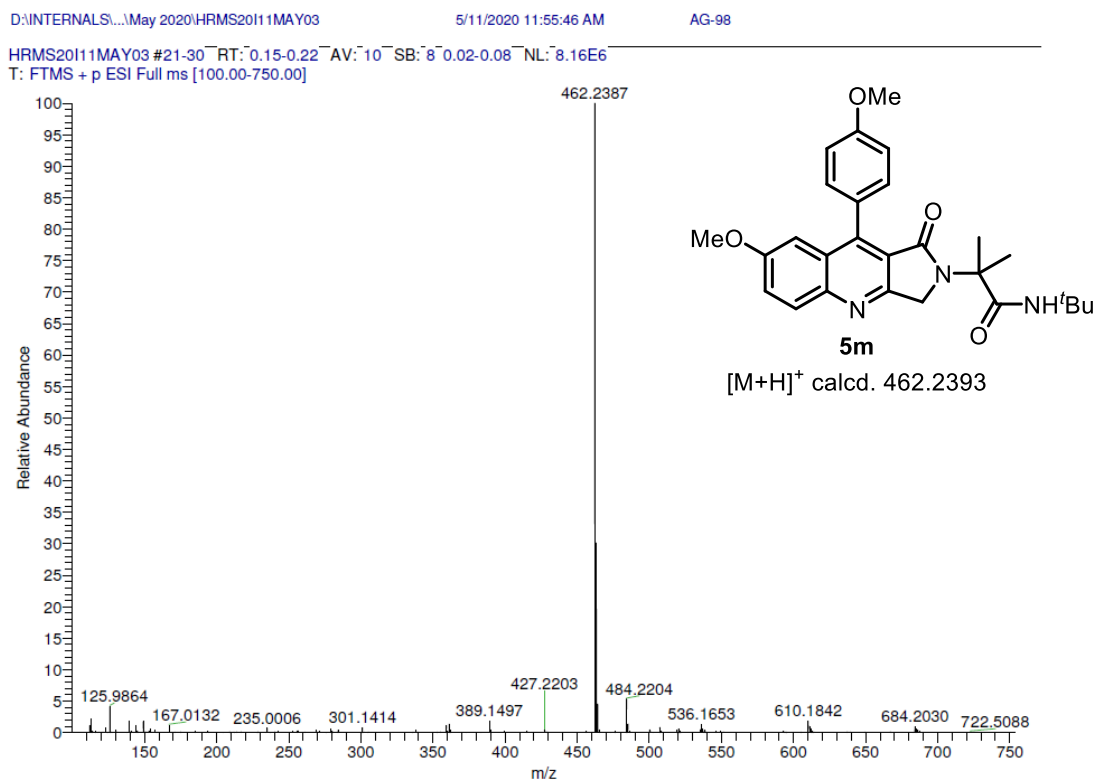



**Figure S53: HRMS Spectrum of compound 5n**

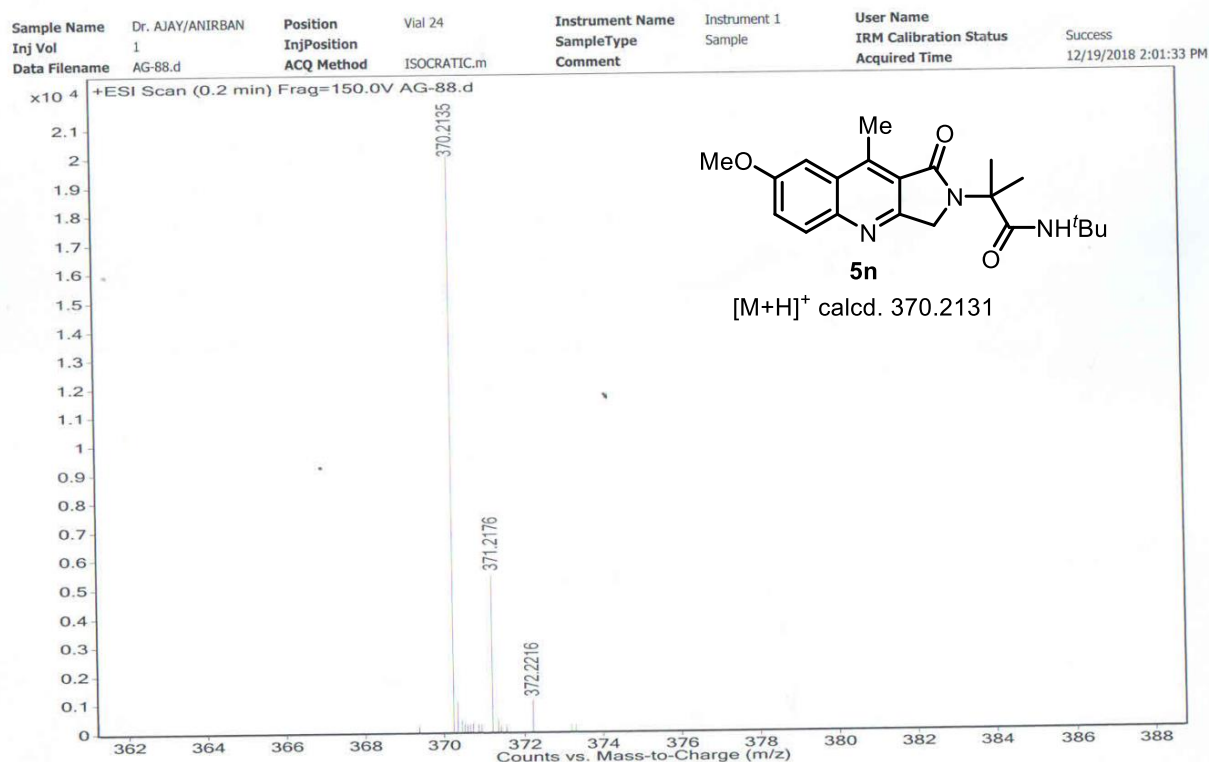

**Figure S54: HRMS Spectrum of compound 5o**

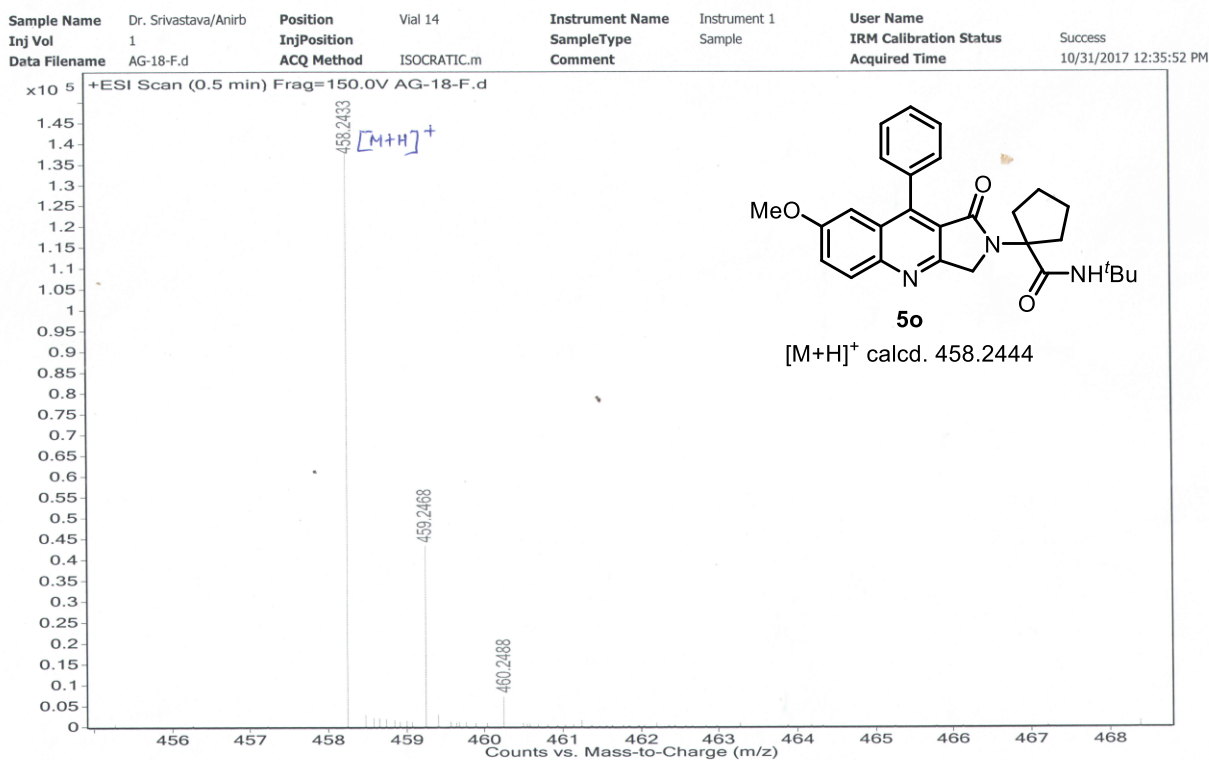

**Figure S55: HRMS Spectrum of compound 5p**

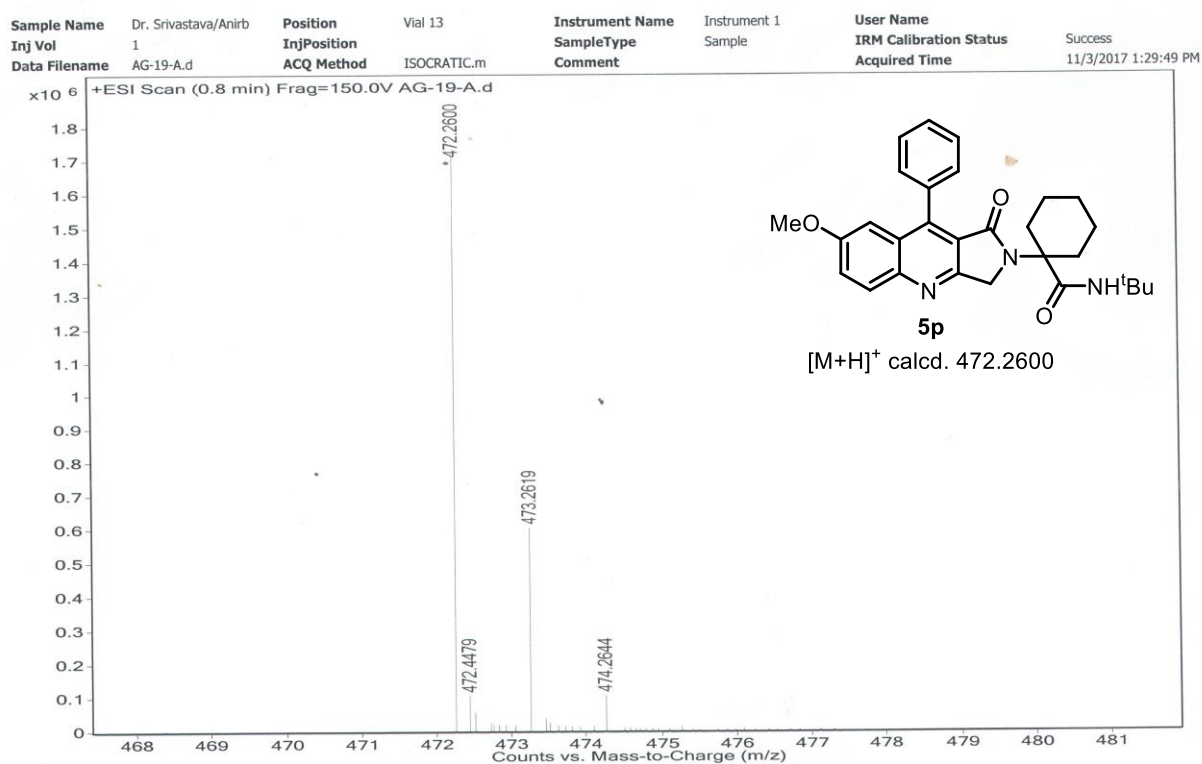

**Figure S56: HRMS Spectrum of compound 5q**

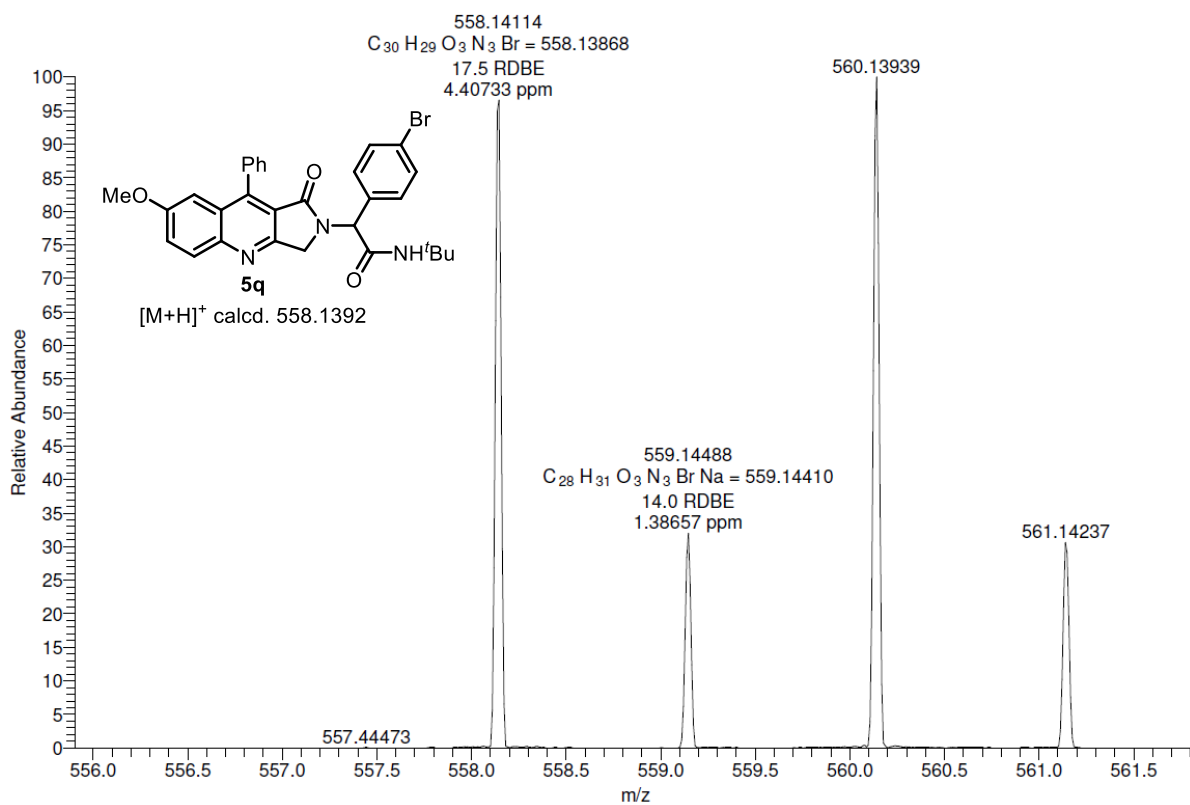

**Figure S57: HRMS Spectrum of compound 6a**

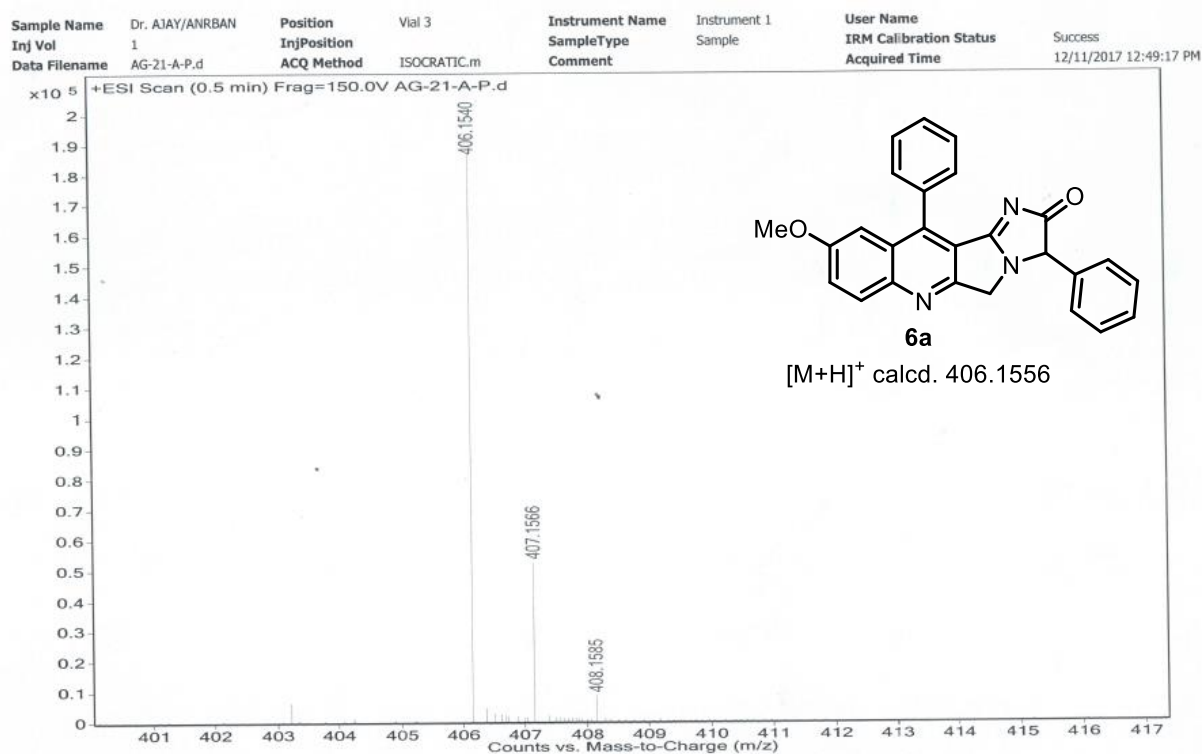

**Figure S58: HRMS Spectrum of compound 6b**

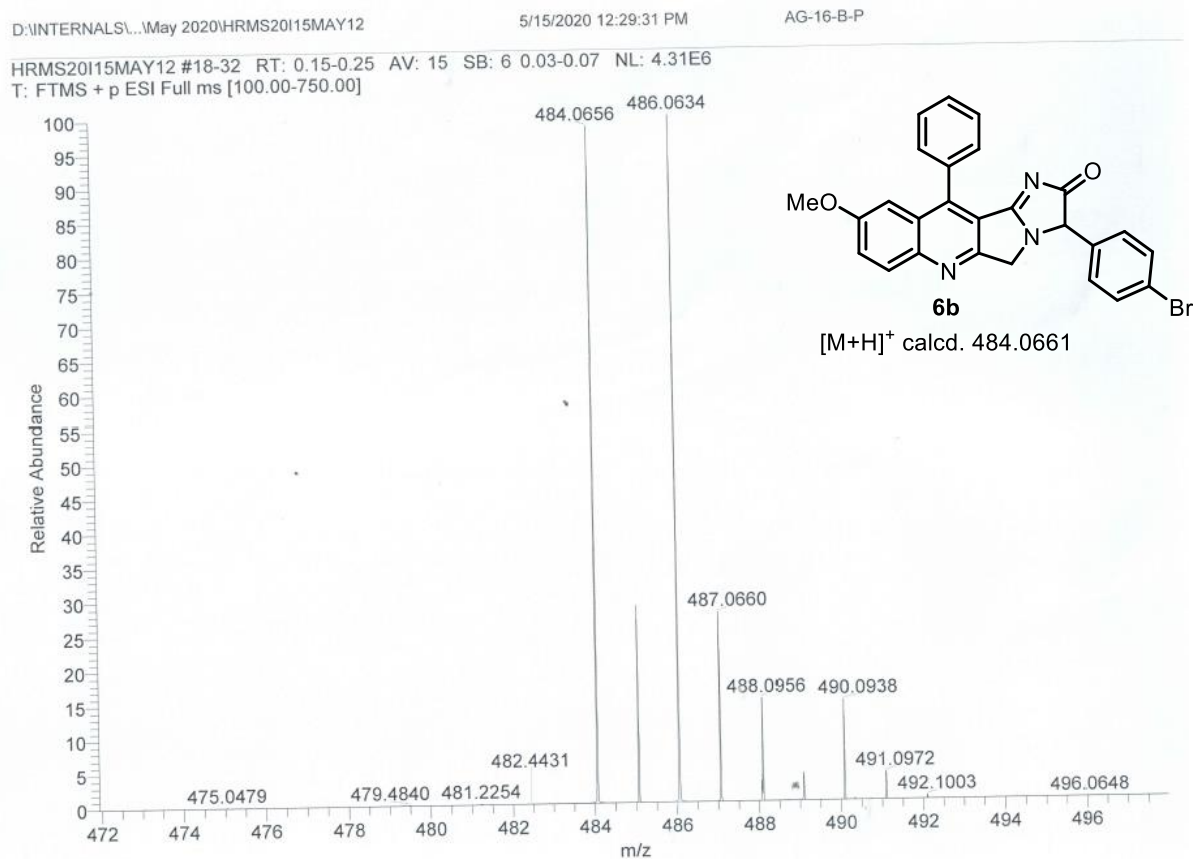

**Figure S59: HRMS Spectrum of compound 6c**

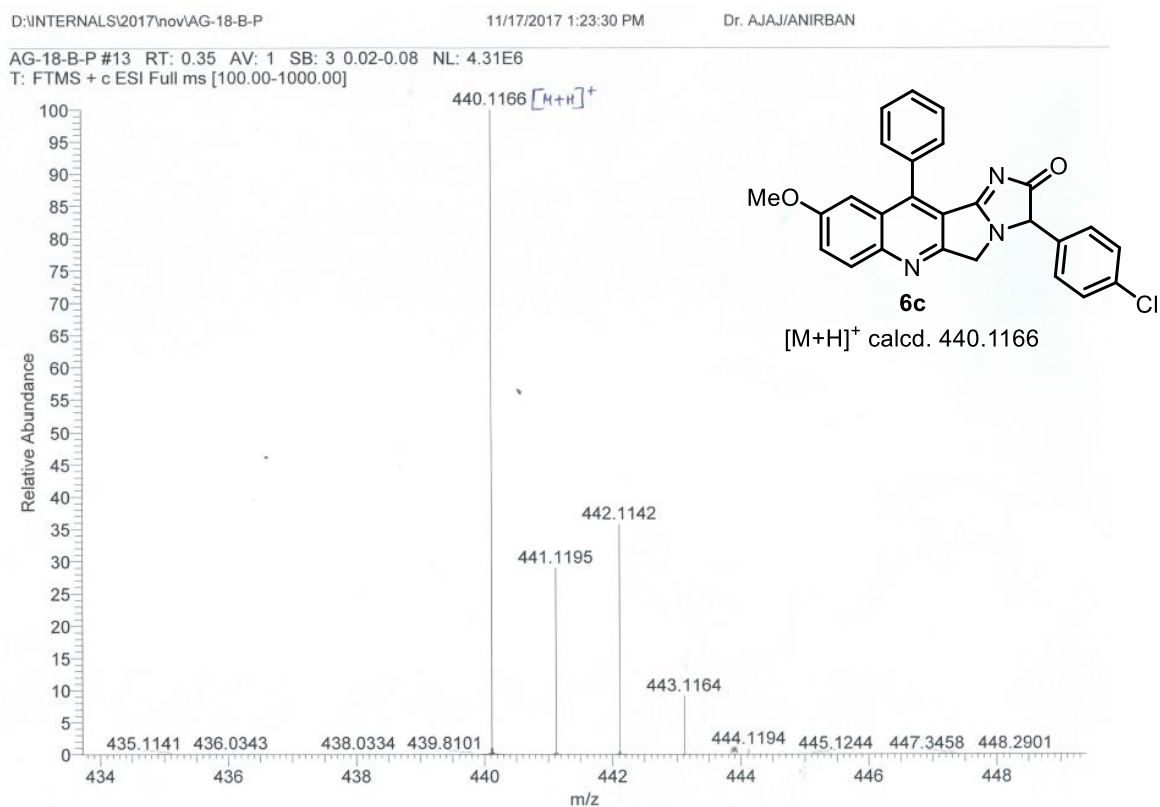

**Figure S60: HRMS Spectrum of compound 6d**

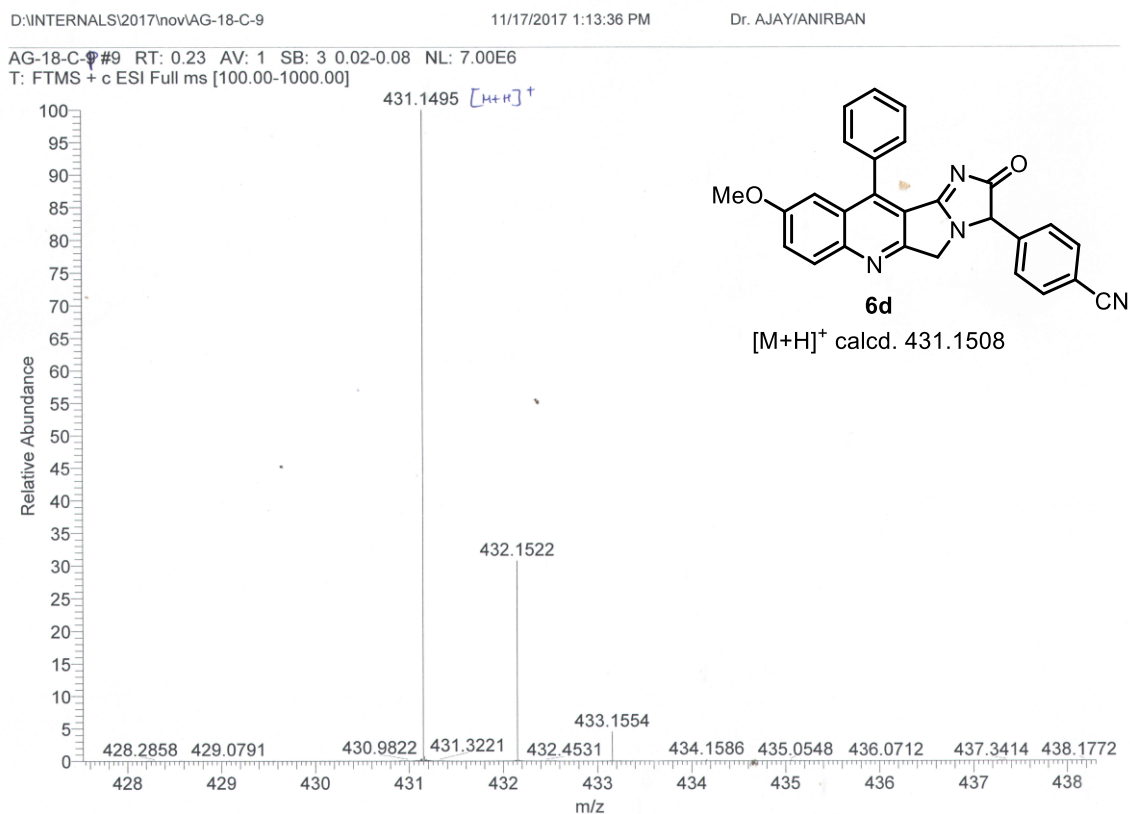

**Figure S61: HRMS Spectrum of compound 6e**

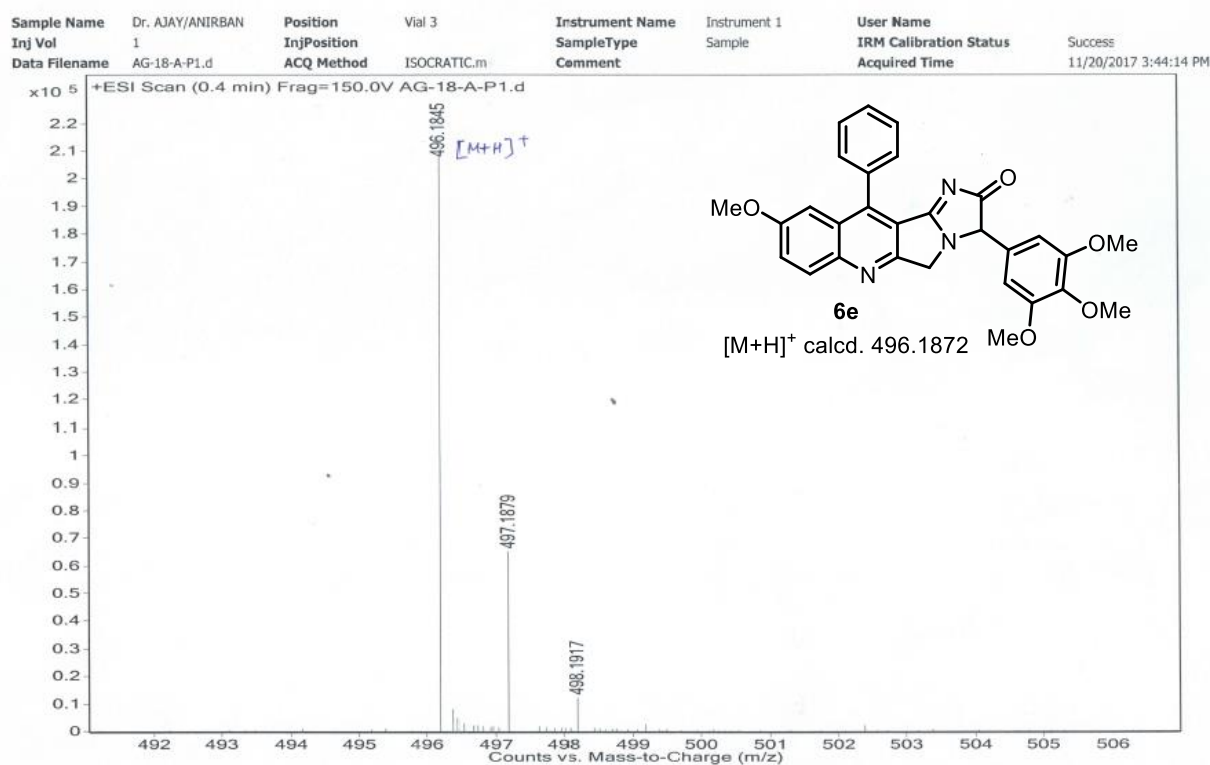

**Figure S62: HRMS Spectrum of compound 6f**

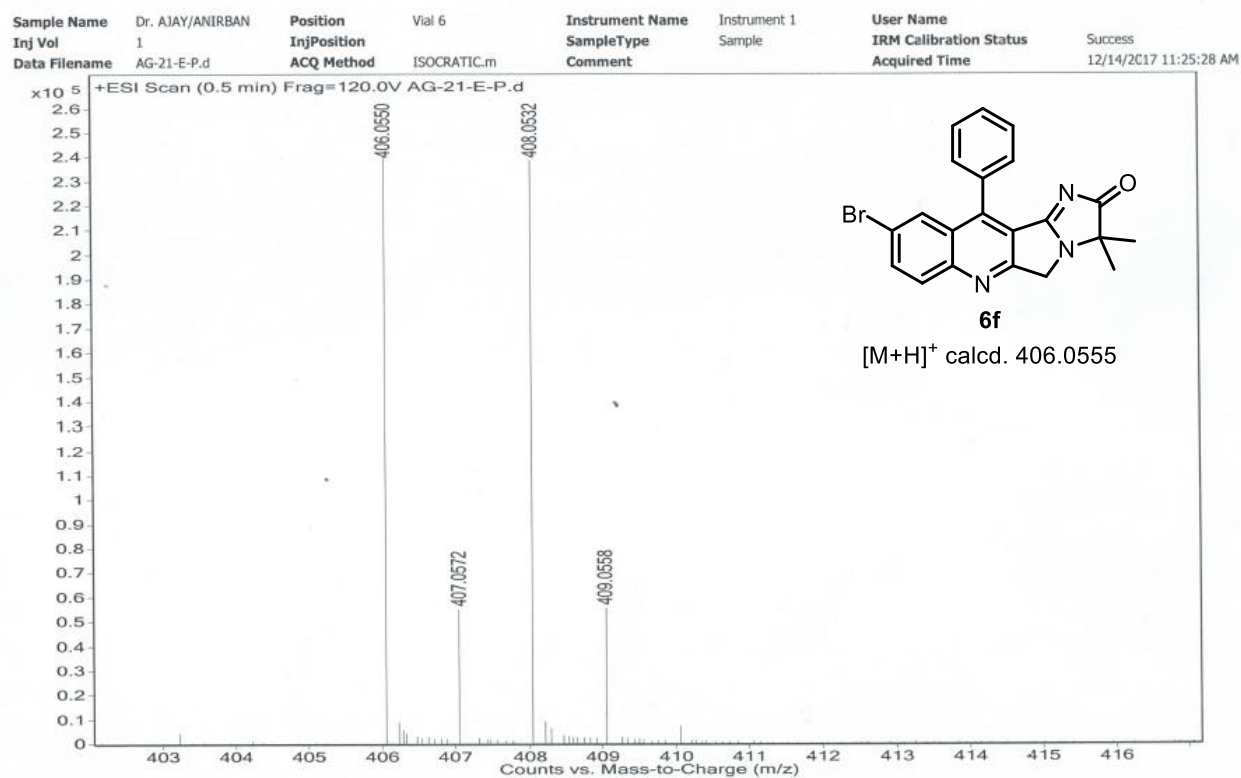

Figure S63: HRMS Spectrum of compound 6g

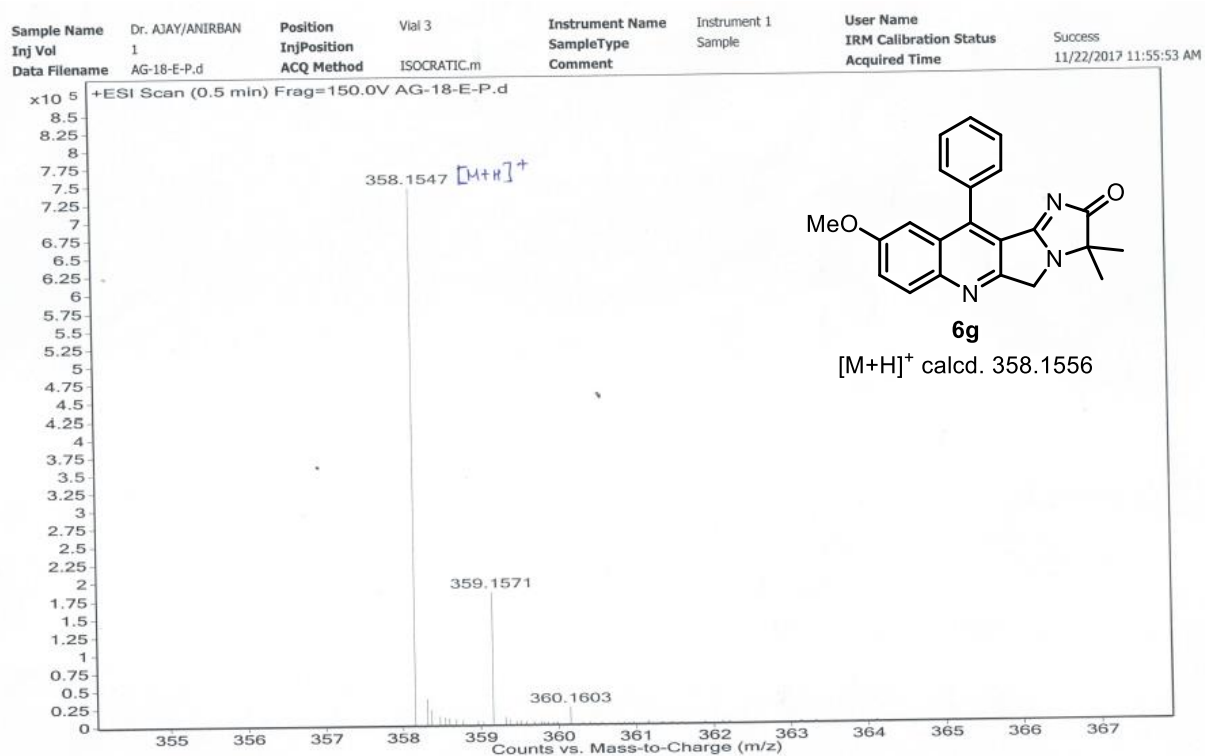

Figure S64: HRMS Spectrum of compound 6h

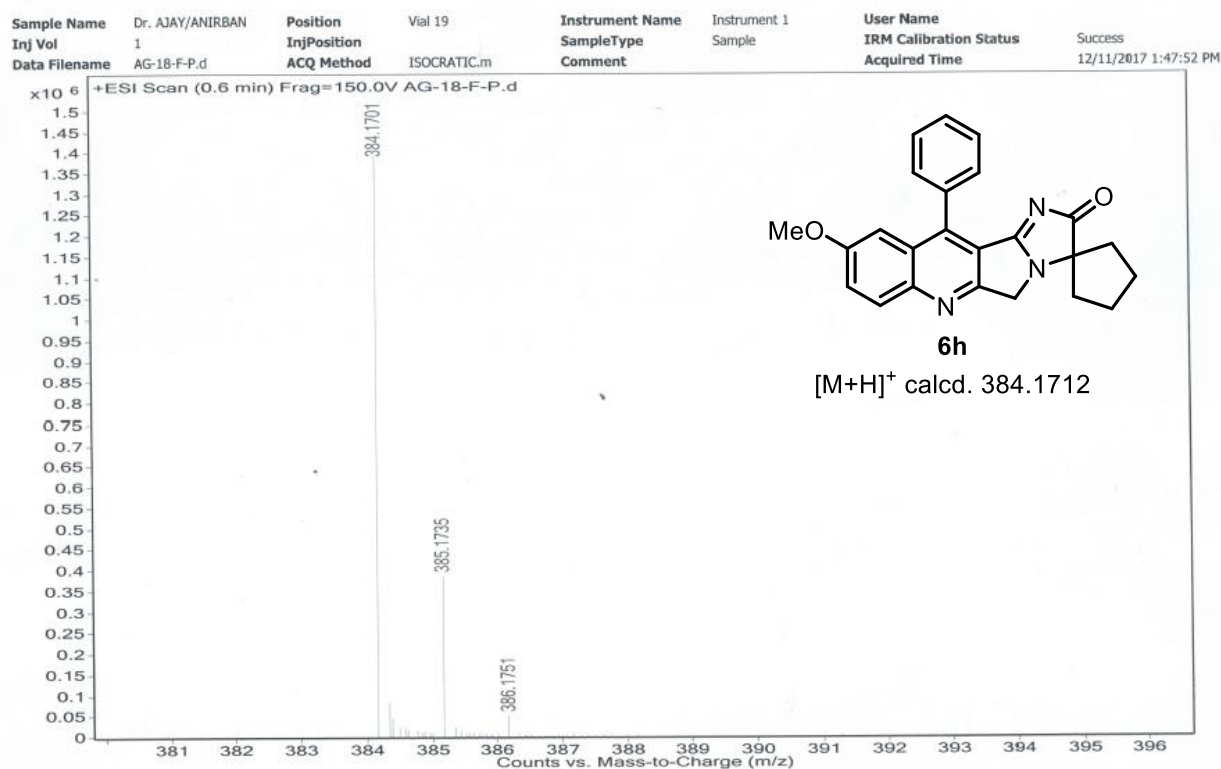

**Figure S65: HRMS Spectrum of compound 6i**

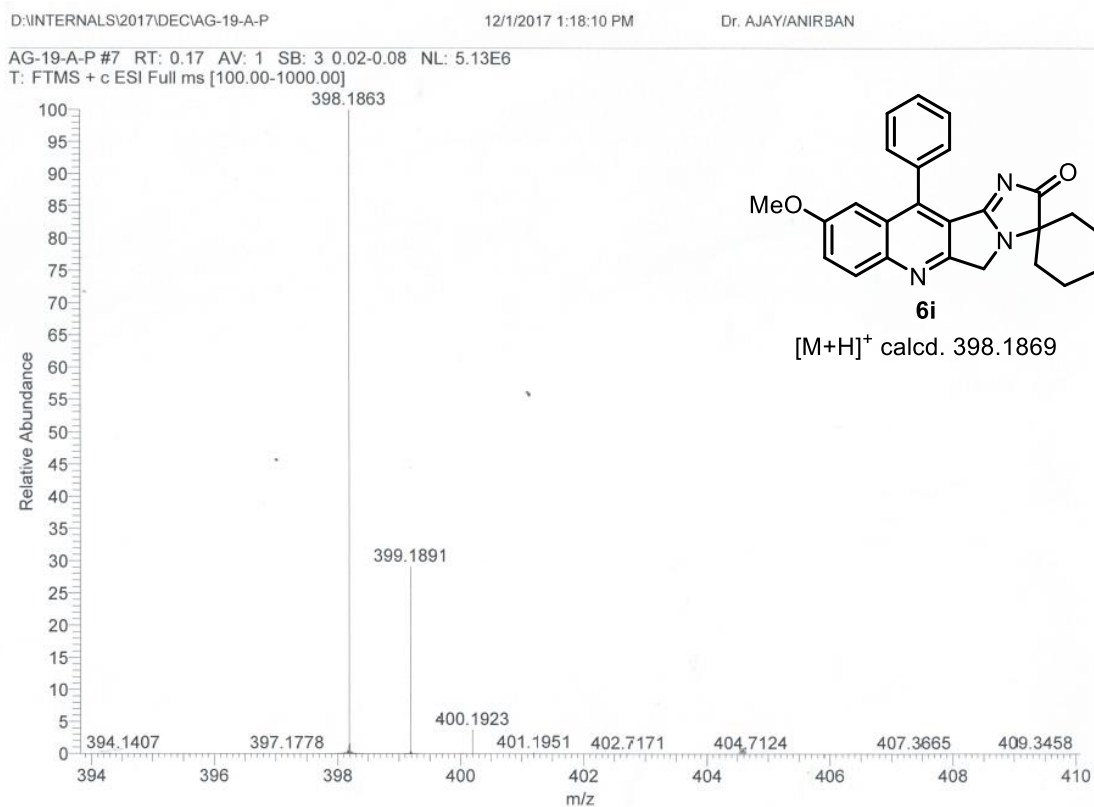

**Figure S66: HRMS Spectrum of compound 7a**

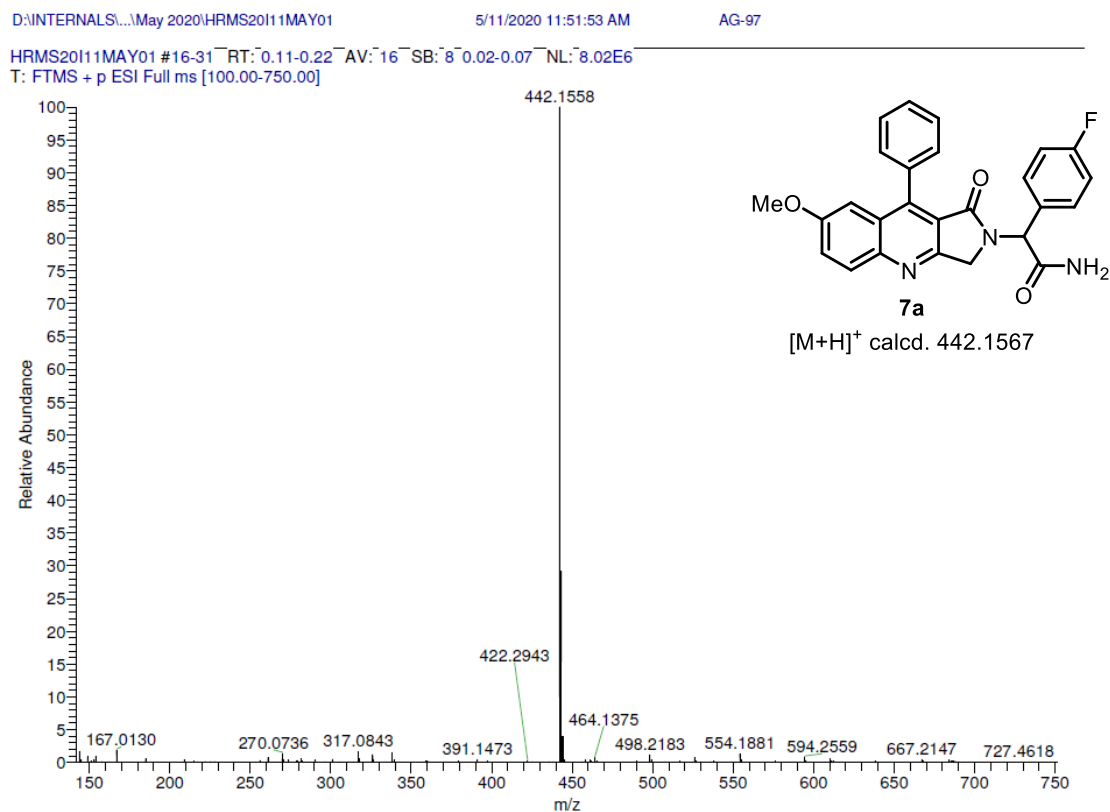

Figure S67: HRMS Spectrum of compound 7b

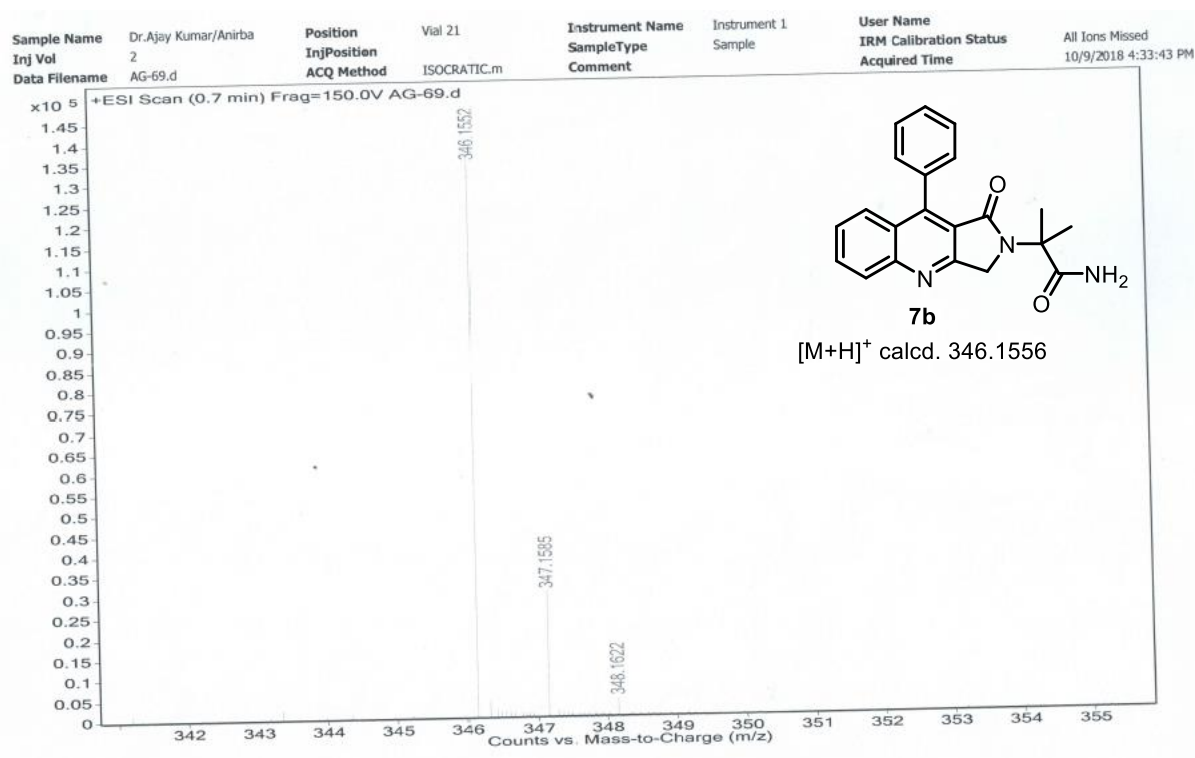

Figure S68: HRMS Spectrum of compound 7c

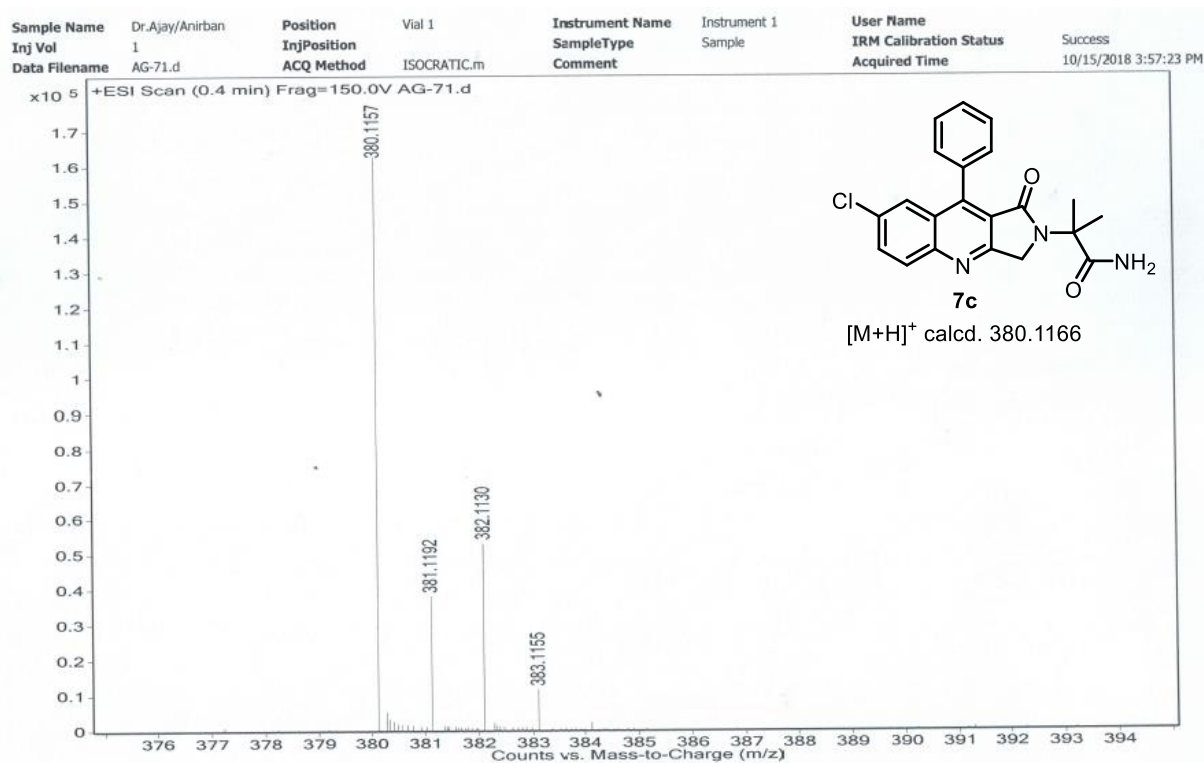



**Figure S69:** HRMS Spectrum of compound **8a**

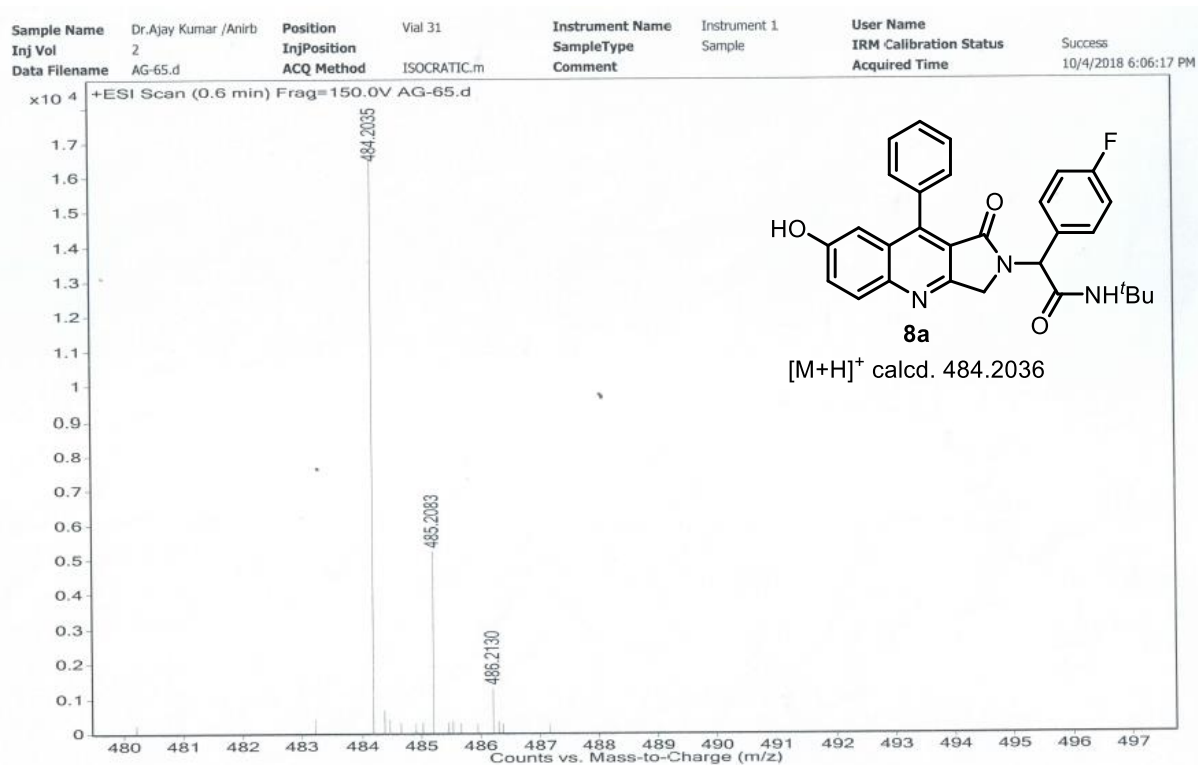

**Figure S70:** HRMS Spectrum of compound **8b**

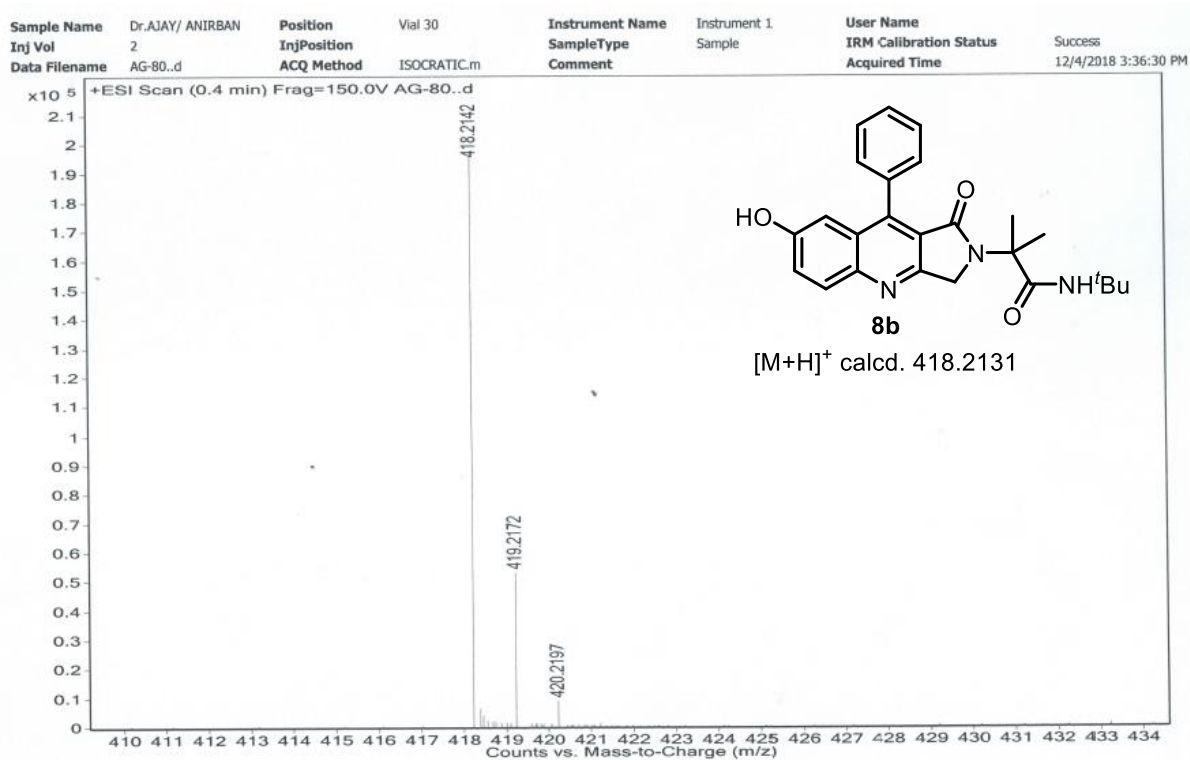

➤ **HPLC Chromatograms:**

**Figure S71.** HPLC of compound **5a**

Data File C:\CHEM32\1\DATA\ANIL-22-04-2020-2 2020-04-22 12-37-05\046-0201.D  
 Sample Name: S-017-0970

```

=====
Acq. Operator   : CBRS-REPOSITORY           Seq. Line :    2
Acq. Instrument : Instrument 1              Location  : Vial 46
Injection Date  : 4/22/2020 12:51:04 PM    Inj       :    1
                                           Inj Volume: 5.000 µl
Acq. Method    : C:\CHEM32\1\DATA\ANIL-22-04-2020-2 2020-04-22 12-37-05\ACN-WATER-90-10.M
Last changed   : 4/20/2020 3:41:17 PM by CBRS-REPOSITORY
Analysis Method: C:\CHEM32\1\METHODS\ACN-WATER-90-10.M
Last changed   : 4/20/2020 3:41:17 PM by CBRS-REPOSITORY
Method Info    : OSDD
  
```

Additional Info : Peak(s) manually integrated

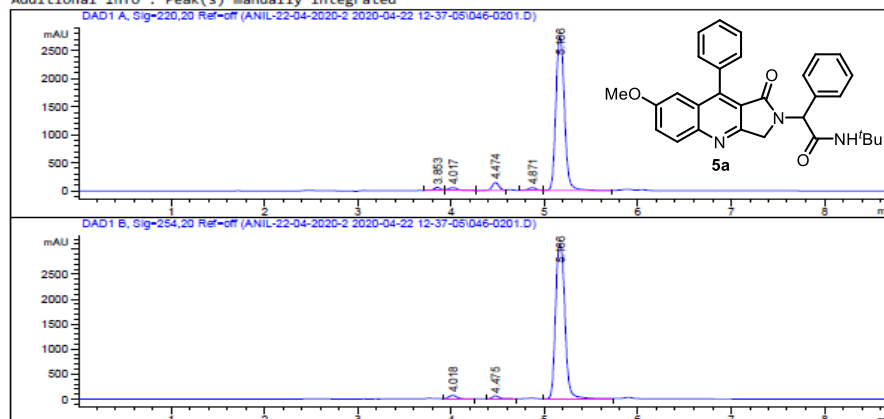

Area Percent Report

```

=====
Sorted By      : Signal
Multiplier     : 1.0000
Dilution      : 1.0000
Use Multiplier & Dilution Factor with ISTDs
  
```

Signal 1: DAD1 A, Sig=220,20 Ref=off

| Peak # | RetTime [min] | Type | Width [min] | Area [mAU*s] | Height [mAU] | Area %  |
|--------|---------------|------|-------------|--------------|--------------|---------|
| 1      | 3.853         | BV   | 0.0790      | 305.30634    | 58.34921     | 1.5944  |
| 2      | 4.017         | VB   | 0.1004      | 344.22580    | 52.54739     | 1.7977  |
| 3      | 4.474         | BV   | 0.0803      | 725.13135    | 140.39035    | 3.7869  |
| 4      | 4.871         | VB   | 0.0909      | 289.94571    | 49.09618     | 1.5142  |
| 5      | 5.166         | BV   | 0.1000      | 1.74836e4    | 2755.58032   | 91.3067 |

Instrument 1 4/22/2020 1:01:54 PM CBRS-REPOSITORY

Page 1 of 2

Data File C:\CHEM32\1\DATA\ANIL-22-04-2020-2 2020-04-22 12-37-05\046-0201.D  
 Sample Name: S-017-0970

Totals : 1.91482e4 3055.96345

Signal 2: DAD1 B, Sig=254,20 Ref=off

| Peak # | RetTime [min] | Type | Width [min] | Area [mAU*s] | Height [mAU] | Area %  |
|--------|---------------|------|-------------|--------------|--------------|---------|
| 1      | 4.018         | BB   | 0.0951      | 400.85669    | 67.67677     | 1.8098  |
| 2      | 4.475         | VV   | 0.0870      | 349.72238    | 60.88288     | 1.5789  |
| 3      | 5.166         | BV   | 0.1105      | 2.13987e4    | 3100.92920   | 96.6113 |

Totals : 2.21493e4 3229.48886

## Figure S72. HPLC of compound 5b

Data File C:\CHEM32\1\DATA\ANIL-KS-15-12-2017-2 2017-12-15 12-51-34\009-0101.D

Sample Name: AG-16-A

```

=====
Acq. Operator   : Dr. Anil Kumar K.S.           Seq. Line :    1
Acq. Instrument : Instrument 1                   Location  : Vial 9
Injection Date  : 12/15/2017 12:53:24 PM       Inj       :    1
                                                    Inj Volume: 3.000 µl
Acq. Method     : C:\CHEM32\1\DATA\ANIL-KS-15-12-2017-2 2017-12-15 12-51-34\ACN-WATER-90-10.M
Last changed    : 12/15/2017 10:35:01 AM by Dr. Anil Kumar K.S.
Analysis Method : C:\CHEM32\1\METHODS\ACN-WATER-90-10.M
Last changed    : 12/15/2017 10:35:01 AM by Dr. Anil Kumar K.S.
Method Info     : OSDD
  
```

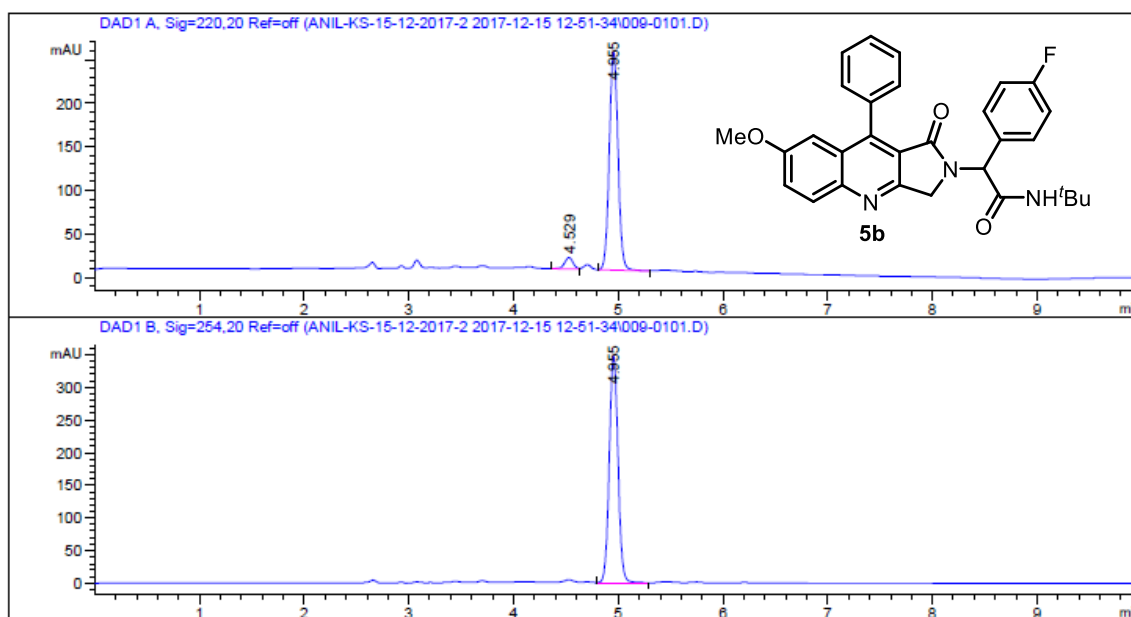

| Peak # | RetTime [min] | Type | Width [min] | Area [mAU*s] | Height [mAU] | Area %  |
|--------|---------------|------|-------------|--------------|--------------|---------|
| 1      | 4.529         | BV   | 0.0877      | 74.75621     | 13.28310     | 4.9067  |
| 2      | 4.955         | BV   | 0.0894      | 1448.79443   | 250.87790    | 95.0933 |

Totals : 1523.55064 264.16099

Signal 2: DAD1 B, Sig=254,20 Ref=off

| Peak # | RetTime [min] | Type | Width [min] | Area [mAU*s] | Height [mAU] | Area %   |
|--------|---------------|------|-------------|--------------|--------------|----------|
| 1      | 4.955         | BB   | 0.0893      | 1999.90173   | 346.87448    | 100.0000 |

Totals : 1999.90173 346.87448

## Figure S73. HPLC of compound 5c

Data File C:\CHEM32\1\DATA\ANIL-KS-15-12-2017-1 2017-12-15 10-35-11\005-0501.D

Sample Name: AG-18-B

```

=====
Acq. Operator   : Dr. Anil Kumar K.S.           Seq. Line :    5
Acq. Instrument : Instrument 1                   Location  : Vial 5
Injection Date  : 12/15/2017 11:24:59 AM       Inj       :    1
                                           Inj Volume: 3.000 µl
Acq. Method    : C:\CHEM32\1\DATA\ANIL-KS-15-12-2017-1 2017-12-15 10-35-11\ACN-WATER-90-10.M
Last changed   : 12/15/2017 10:35:01 AM by Dr. Anil Kumar K.S.
Analysis Method: C:\CHEM32\1\METHODS\ACN-WATER-90-10.M
Last changed   : 12/15/2017 10:35:01 AM by Dr. Anil Kumar K.S.
Method Info    : OSDD
    
```

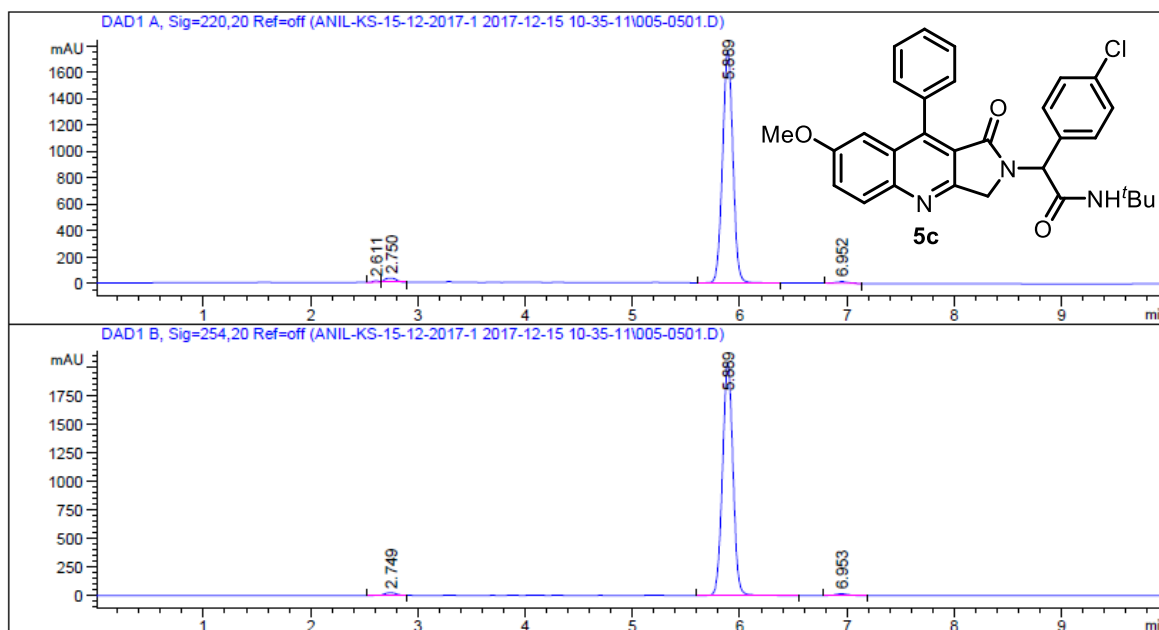

| Peak # | RetTime [min] | Type | Width [min] | Area [mAU*s] | Height [mAU] | Area %  |
|--------|---------------|------|-------------|--------------|--------------|---------|
| 1      | 2.611         | VV   | 0.0536      | 42.89240     | 12.63753     | 0.3528  |
| 2      | 2.750         | VB   | 0.1211      | 238.73804    | 31.98623     | 1.9639  |
| 3      | 5.889         | BV   | 0.1044      | 1.17859e4    | 1753.70935   | 96.9545 |
| 4      | 6.952         | BB   | 0.1168      | 88.57812     | 11.90393     | 0.7287  |

Totals : 1.21561e4 1810.23704

Signal 2: DAD1 B, Sig=254,20 Ref=off

| Peak # | RetTime [min] | Type | Width [min] | Area [mAU*s] | Height [mAU] | Area %  |
|--------|---------------|------|-------------|--------------|--------------|---------|
| 1      | 2.749         | VV   | 0.1286      | 180.87119    | 22.78513     | 1.2834  |
| 2      | 5.889         | BB   | 0.1049      | 1.37997e4    | 2041.10522   | 97.9162 |
| 3      | 6.953         | BB   | 0.1180      | 112.80927    | 14.95814     | 0.8004  |

Totals : 1.40934e4 2078.84849

## Figure S74. HPLC of compound 5d

Data File C:\CHEM32\1\DATA\ANIL-KS-15-12-2017-2 2017-12-15 12-51-34\012-0401.D

Sample Name: AG-16-D

```

=====
Acq. Operator   : Dr. Anil Kumar K.S.           Seq. Line :    4
Acq. Instrument : Instrument 1                   Location  : Vial 12
Injection Date  : 12/15/2017 1:29:21 PM        Inj       :    1
                                                    Inj Volume: 3.000 µl

Acq. Method     : C:\CHEM32\1\DATA\ANIL-KS-15-12-2017-2 2017-12-15 12-51-34\ACN-WATER-90-10.M
Last changed    : 12/15/2017 10:35:01 AM by Dr. Anil Kumar K.S.
Analysis Method : C:\CHEM32\1\METHODS\ACN-WATER-90-10.M
Last changed    : 12/15/2017 10:35:01 AM by Dr. Anil Kumar K.S.
Method Info     : OSDD
    
```

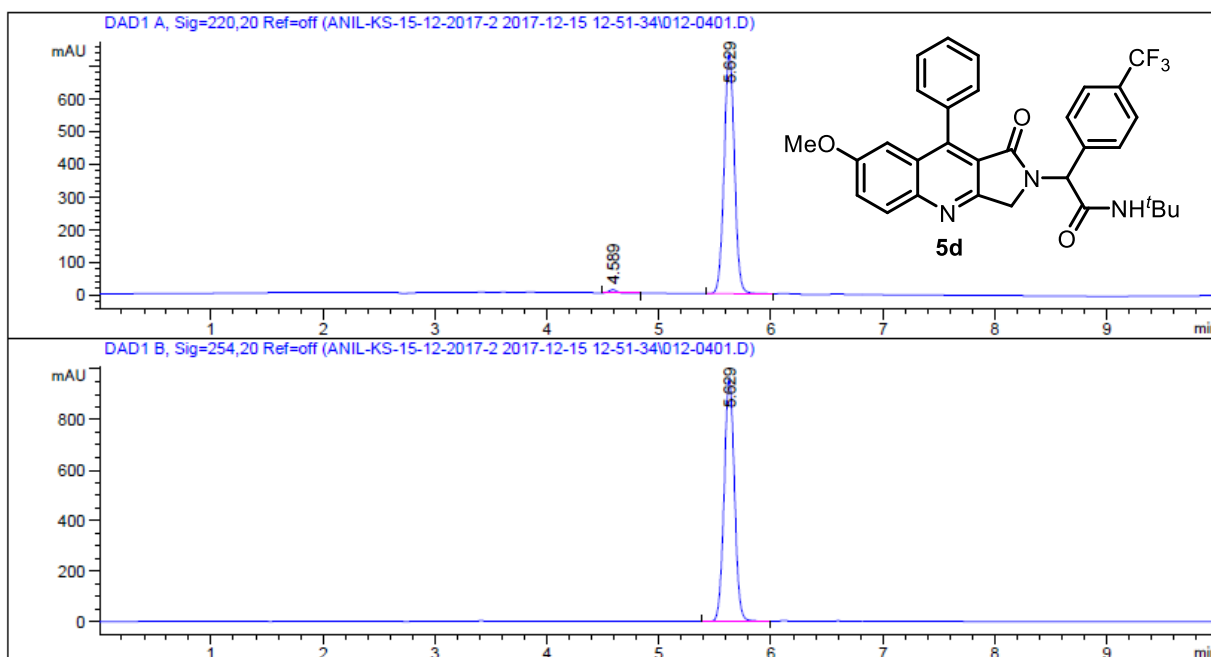

| Peak # | RetTime [min] | Type | Width [min] | Area [mAU*s] | Height [mAU] | Area %  |
|--------|---------------|------|-------------|--------------|--------------|---------|
| 1      | 4.589         | VB   | 0.0735      | 49.19337     | 10.34305     | 1.0353  |
| 2      | 5.629         | VV   | 0.1007      | 4702.18848   | 733.96106    | 98.9647 |

Totals : 4751.38185 744.30411

Signal 2: DAD1 B, Sig=254,20 Ref=off

| Peak # | RetTime [min] | Type | Width [min] | Area [mAU*s] | Height [mAU] | Area %   |
|--------|---------------|------|-------------|--------------|--------------|----------|
| 1      | 5.629         | BV   | 0.1007      | 6156.72510   | 961.58978    | 100.0000 |

Totals : 6156.72510 961.58978

## Figure S75. HPLC of compound 5e

Data File C:\CHEM32\1\DATA\ANIL-KS-15-12-2017-1 2017-12-15 10-35-11\008-0801.D  
 Sample Name: AG-18-C

```
=====
Acq. Operator   : Dr. Anil Kumar K.S.           Seq. Line :    8
Acq. Instrument : Instrument 1                  Location  : Vial 8
Injection Date  : 12/15/2017 12:00:57 PM      Inj       :    1
                                           Inj Volume: 3.000 µl
Acq. Method     : C:\CHEM32\1\DATA\ANIL-KS-15-12-2017-1 2017-12-15 10-35-11\ACN-WATER-90-10.M
Last changed    : 12/15/2017 10:35:01 AM by Dr. Anil Kumar K.S.
Analysis Method : C:\CHEM32\1\METHODS\ACN-WATER-90-10.M
Last changed    : 12/15/2017 10:35:01 AM by Dr. Anil Kumar K.S.
Method Info     : OSDD
=====
```

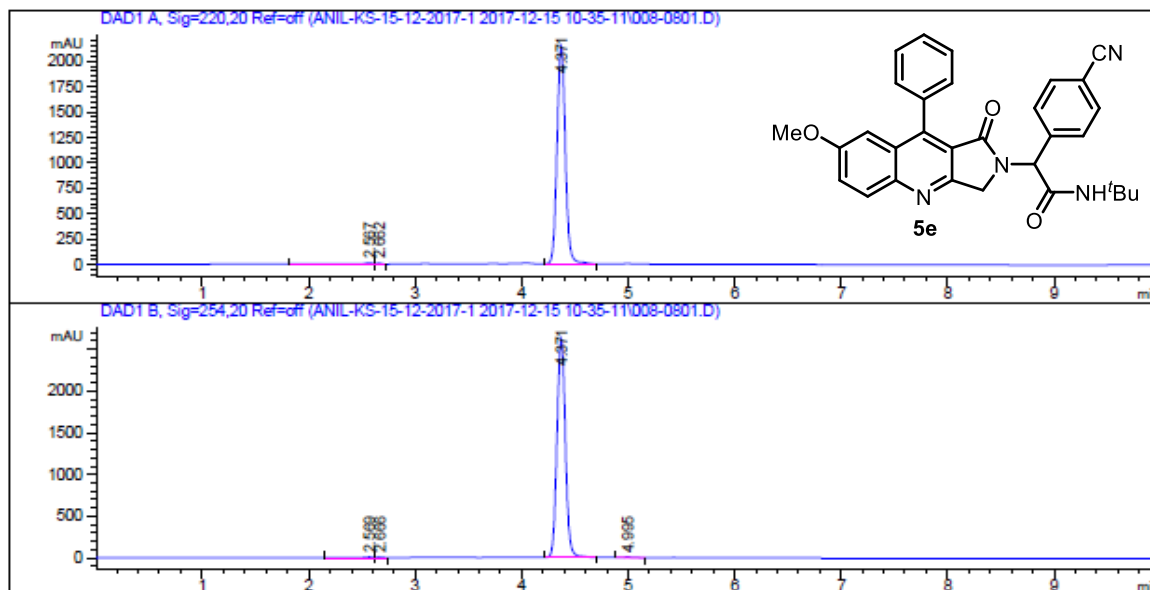

| Peak #   | RetTime [min] | Type | Width [min] | Area [mAU*s] | Height [mAU] | Area %  |
|----------|---------------|------|-------------|--------------|--------------|---------|
| 1        | 2.567         | VV   | 0.1949      | 224.47668    | 14.63903     | 1.9014  |
| 2        | 2.662         | VB   | 0.0554      | 37.57271     | 10.58339     | 0.3183  |
| 3        | 4.371         | BV   | 0.0851      | 1.15436e4    | 2134.05884   | 97.7803 |
| Totals : |               |      |             | 1.18056e4    | 2159.28126   |         |

Signal 2: DAD1 B, Sig=254,20 Ref=off

| Peak #   | RetTime [min] | Type | Width [min] | Area [mAU*s] | Height [mAU] | Area %  |
|----------|---------------|------|-------------|--------------|--------------|---------|
| 1        | 2.569         | BV   | 0.0643      | 29.10434     | 6.74852      | 0.2012  |
| 2        | 2.666         | VB   | 0.0546      | 22.12838     | 6.36094      | 0.1530  |
| 3        | 4.371         | BV   | 0.0861      | 1.43707e4    | 2617.52319   | 99.3653 |
| 4        | 4.995         | BB   | 0.0915      | 40.56085     | 7.01396      | 0.2805  |
| Totals : |               |      |             | 1.44625e4    | 2637.64661   |         |

## Figure S76. HPLC of compound 5f

Data File C:\CHEM32\1\DATA\ANIL-KS-15-12-2017-2 2017-12-15 12-51-34\011-0301.D  
 Sample Name: AG-16-C

```

=====
Acq. Operator   : Dr. Anil Kumar K.S.          Seq. Line :    3
Acq. Instrument : Instrument 1                 Location  : Vial 11
Injection Date  : 12/15/2017 1:17:24 PM      Inj       :    1
                                           Inj Volume: 3.000 µl

Acq. Method    : C:\CHEM32\1\DATA\ANIL-KS-15-12-2017-2 2017-12-15 12-51-34\ACN-WATER-90-10.M
Last changed   : 12/15/2017 10:35:01 AM by Dr. Anil Kumar K.S.
Analysis Method : C:\CHEM32\1\METHODS\ACN-WATER-90-10.M
Last changed   : 12/15/2017 10:35:01 AM by Dr. Anil Kumar K.S.
Method Info    : OSDD
  
```

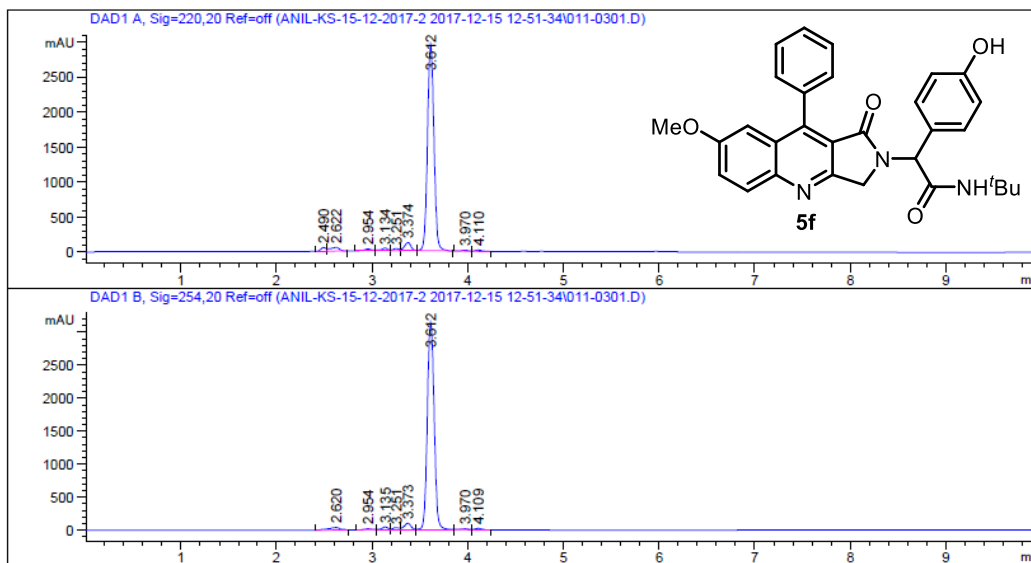

| Peak # | RetTime [min] | Type | Width [min] | Area [mAU*s] | Height [mAU] | Area %  |
|--------|---------------|------|-------------|--------------|--------------|---------|
| 1      | 2.490         | BV   | 0.0601      | 221.87688    | 56.20625     | 1.4357  |
| 2      | 2.622         | VB   | 0.0964      | 368.11603    | 54.76589     | 2.3820  |
| 3      | 2.954         | BV   | 0.0744      | 138.84819    | 26.80680     | 0.8985  |
| 4      | 3.134         | VV   | 0.0745      | 183.18430    | 36.55915     | 1.1853  |
| 5      | 3.251         | VV   | 0.0622      | 119.30866    | 28.90448     | 0.7720  |
| 6      | 3.374         | VB   | 0.0723      | 535.85718    | 115.05862    | 3.4674  |
| 7      | 3.612         | BB   | 0.0726      | 1.37379e4    | 2935.39307   | 88.8951 |
| 8      | 3.970         | BV   | 0.0812      | 64.03028     | 11.82412     | 0.4143  |
| 9      | 4.110         | VB   | 0.0788      | 84.93763     | 16.85517     | 0.5496  |

Totals : 1.54540e4 3282.37354

Signal 2: DAD1 B, Sig=254,20 Ref=off

| Peak # | RetTime [min] | Type | Width [min] | Area [mAU*s] | Height [mAU] | Area %  |
|--------|---------------|------|-------------|--------------|--------------|---------|
| 1      | 2.620         | BV   | 0.1155      | 321.04678    | 38.40248     | 1.9249  |
| 2      | 2.954         | BV   | 0.0682      | 74.12491     | 15.96286     | 0.4444  |
| 3      | 3.135         | VV   | 0.0654      | 171.70801    | 40.57630     | 1.0295  |
| 4      | 3.251         | VV   | 0.0610      | 119.41612    | 29.66819     | 0.7160  |
| 5      | 3.373         | VB   | 0.0735      | 446.52136    | 93.80724     | 2.6772  |
| 6      | 3.612         | BB   | 0.0793      | 1.53550e4    | 3129.08081   | 92.0628 |
| 7      | 3.970         | BV   | 0.0788      | 75.03034     | 14.38816     | 0.4499  |
| 8      | 4.109         | VB   | 0.0780      | 115.98534    | 23.31987     | 0.6954  |

Totals : 1.66788e4 3385.20592

## Figure S77. HPLC of compound 5g

Data File C:\CHEM32\1\DATA\ANIL-KS-15-12-2017-1 2017-12-15 10-35-11\001-0101.D  
 Sample Name: AG-136

```

=====
Acq. Operator   : Dr. Anil Kumar K.S.           Seq. Line :    1
Acq. Instrument : Instrument 1                   Location  : Vial 1
Injection Date  : 12/15/2017 10:36:55 AM       Inj       :    1
                                                    Inj Volume: 3.000 µl
Acq. Method     : C:\CHEM32\1\DATA\ANIL-KS-15-12-2017-1 2017-12-15 10-35-11\ACN-WATER-90-10.M
Last changed    : 12/15/2017 10:35:01 AM by Dr. Anil Kumar K.S.
Analysis Method : C:\CHEM32\1\METHODS\ACN-WATER-90-10.M
Last changed    : 12/15/2017 10:35:01 AM by Dr. Anil Kumar K.S.
Method Info     : OSDD
  
```

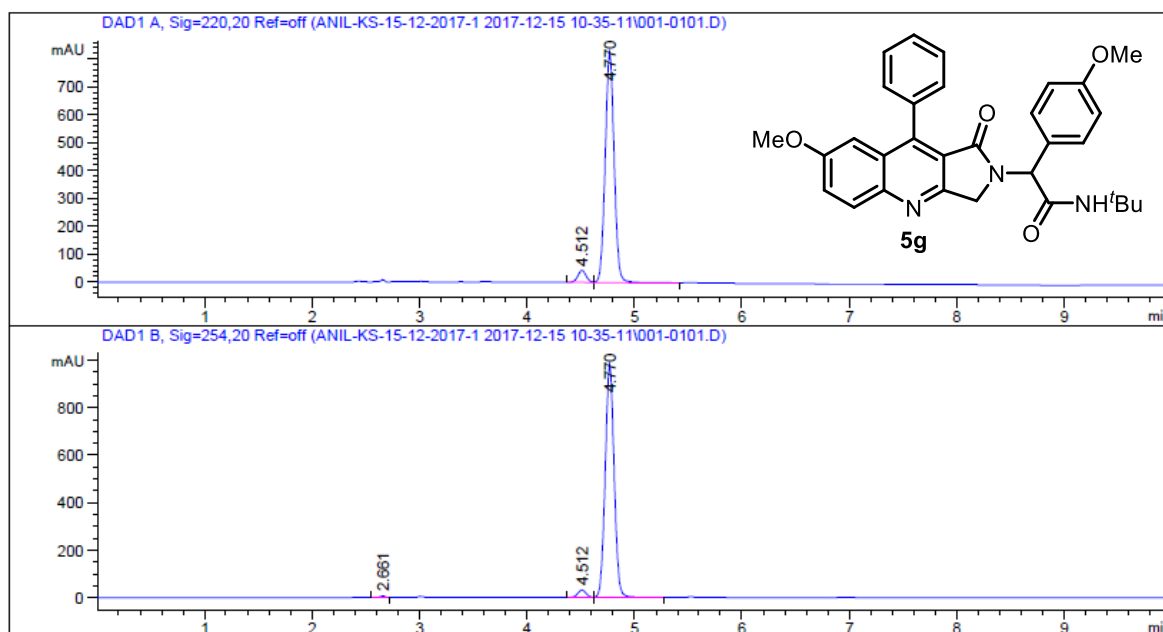

| Peak # | RetTime [min] | Type | Width [min] | Area [mAU*s] | Height [mAU] | Area %  |
|--------|---------------|------|-------------|--------------|--------------|---------|
| 1      | 4.512         | VV   | 0.0822      | 230.72125    | 43.26201     | 4.6156  |
| 2      | 4.770         | VB   | 0.0894      | 4768.02051   | 825.53345    | 95.3844 |

Totals : 4998.74176 868.79546

Signal 2: DAD1 B, Sig=254,20 Ref=off

| Peak # | RetTime [min] | Type | Width [min] | Area [mAU*s] | Height [mAU] | Area %  |
|--------|---------------|------|-------------|--------------|--------------|---------|
| 1      | 2.661         | VV   | 0.0509      | 21.22003     | 6.71313      | 0.3626  |
| 2      | 4.512         | VV   | 0.0823      | 168.00214    | 31.45425     | 2.8707  |
| 3      | 4.770         | VB   | 0.0894      | 5663.09131   | 980.83392    | 96.7667 |

Totals : 5852.31347 1019.00130



## Figure S78. HPLC of compound 5h

Data File C:\CHEM32\1\DATA\ANIL-KS-15-12-2017-1 2017-12-15 10-35-11\002-0201.D

Sample Name: AG-18-A

```

=====
Acq. Operator   : Dr. Anil Kumar K.S.           Seq. Line :    2
Acq. Instrument : Instrument 1                  Location  : Vial 2
Injection Date  : 12/15/2017 10:48:53 AM      Inj       :    1
                                           Inj Volume: 3.000 µl
Acq. Method     : C:\CHEM32\1\DATA\ANIL-KS-15-12-2017-1 2017-12-15 10-35-11\ACN-WATER-90-10.M
Last changed    : 12/15/2017 10:35:01 AM by Dr. Anil Kumar K.S.
Analysis Method : C:\CHEM32\1\METHODS\ACN-WATER-90-10.M
Last changed    : 12/15/2017 10:35:01 AM by Dr. Anil Kumar K.S.
Method Info     : OSDD
    
```

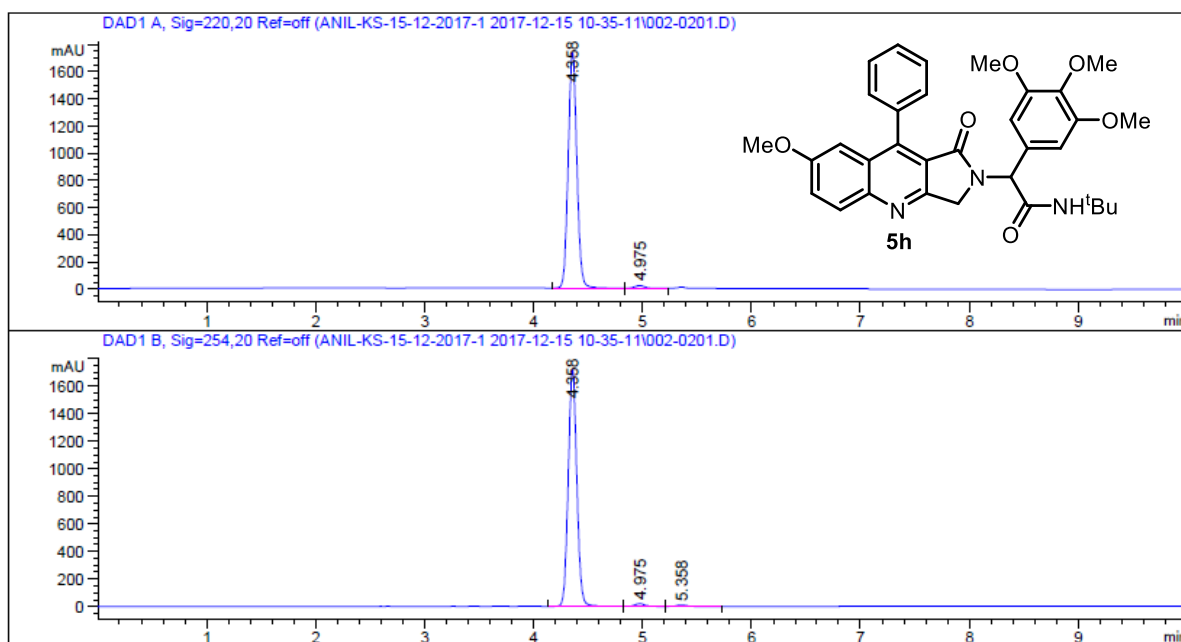

| Peak # | RetTime [min] | Type | Width [min] | Area [mAU*s] | Height [mAU] | Area %  |
|--------|---------------|------|-------------|--------------|--------------|---------|
| 1      | 4.358         | BV   | 0.0863      | 9576.26074   | 1736.92810   | 98.6785 |
| 2      | 4.975         | VV   | 0.1007      | 128.24675    | 19.50057     | 1.3215  |

Totals : 9704.50749 1756.42867

Signal 2: DAD1 B, Sig=254,20 Ref=off

| Peak # | RetTime [min] | Type | Width [min] | Area [mAU*s] | Height [mAU] | Area %  |
|--------|---------------|------|-------------|--------------|--------------|---------|
| 1      | 4.358         | BV   | 0.0838      | 9417.81641   | 1723.43262   | 98.0696 |
| 2      | 4.975         | VV   | 0.0966      | 120.32935    | 19.32729     | 1.2530  |
| 3      | 5.358         | VB   | 0.0936      | 65.05067     | 10.90698     | 0.6774  |

Totals : 9603.19642 1753.66689

## Figure S79. HPLC of compound 5i

Data File C:\CHEM32\1\DATA\ANIL-KS-15-12-2017-1 2017-12-15 10-35-11\006-0601.D  
 Sample Name: AG-21-B

```

=====
Acq. Operator   : Dr. Anil Kumar K.S.           Seq. Line :    6
Acq. Instrument : Instrument 1                   Location  : Vial 6
Injection Date  : 12/15/2017 11:36:57 AM       Inj       :    1
                                                    Inj Volume: 3.000 µl

Acq. Method    : C:\CHEM32\1\DATA\ANIL-KS-15-12-2017-1 2017-12-15 10-35-11\ACN-WATER-90-10.M
Last changed   : 12/15/2017 10:35:01 AM by Dr. Anil Kumar K.S.
Analysis Method: C:\CHEM32\1\METHODS\ACN-WATER-90-10.M
Last changed   : 12/15/2017 10:35:01 AM by Dr. Anil Kumar K.S.
Method Info    : OSDD
  
```

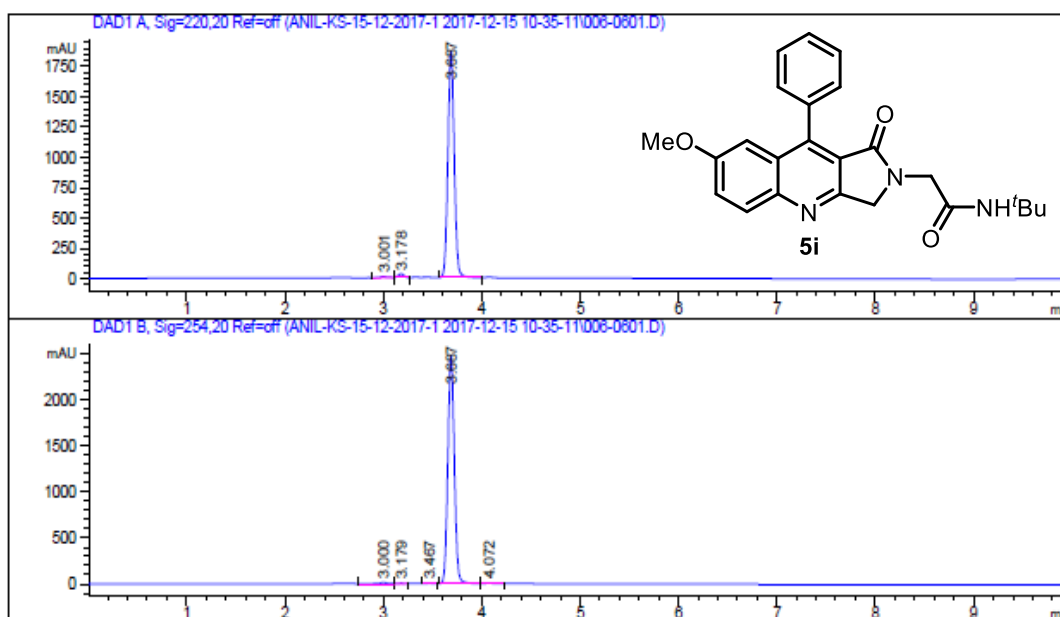

| Peak # | RetTime [min] | Type | Width [min] | Area [mAU*s] | Height [mAU] | Area %  |
|--------|---------------|------|-------------|--------------|--------------|---------|
| 1      | 3.001         | VV   | 0.0783      | 61.49919     | 11.15435     | 0.7148  |
| 2      | 3.178         | VB   | 0.0641      | 125.84449    | 30.50060     | 1.4628  |
| 3      | 3.687         | BV   | 0.0685      | 8415.78418   | 1870.13306   | 97.8224 |

Totals : 8603.12786 1911.78800

Signal 2: DAD1 B, Sig=254,20 Ref=off

| Peak # | RetTime [min] | Type | Width [min] | Area [mAU*s] | Height [mAU] | Area %  |
|--------|---------------|------|-------------|--------------|--------------|---------|
| 1      | 3.000         | BV   | 0.0695      | 65.43272     | 14.26784     | 0.5651  |
| 2      | 3.179         | VV   | 0.0723      | 26.98400     | 5.59539      | 0.2330  |
| 3      | 3.467         | VB   | 0.0688      | 23.95547     | 5.29011      | 0.2069  |
| 4      | 3.687         | BV   | 0.0737      | 1.14160e4    | 2479.01758   | 98.5917 |
| 5      | 4.072         | VB   | 0.0838      | 46.69102     | 8.54166      | 0.4032  |

Totals : 1.15791e4 2512.71257

## Figure S80. HPLC of compound 5j

Data File C:\CHEM32\1\DATA\ANIL-KS-15-12-2017-1 2017-12-15 10-35-11\007-0701.D  
 Sample Name: AG-21-D

```

=====
Acq. Operator   : Dr. Anil Kumar K.S.           Seq. Line :    7
Acq. Instrument : Instrument 1                   Location  : Vial 7
Injection Date  : 12/15/2017 11:48:57 AM       Inj       :    1
                                           Inj Volume: 3.000 µl
Acq. Method     : C:\CHEM32\1\DATA\ANIL-KS-15-12-2017-1 2017-12-15 10-35-11\ACN-WATER-90-10.M
Last changed    : 12/15/2017 10:35:01 AM by Dr. Anil Kumar K.S.
Analysis Method : C:\CHEM32\1\METHODS\ACN-WATER-90-10.M
Last changed    : 12/15/2017 10:35:01 AM by Dr. Anil Kumar K.S.
Method Info     : OSDD
  
```

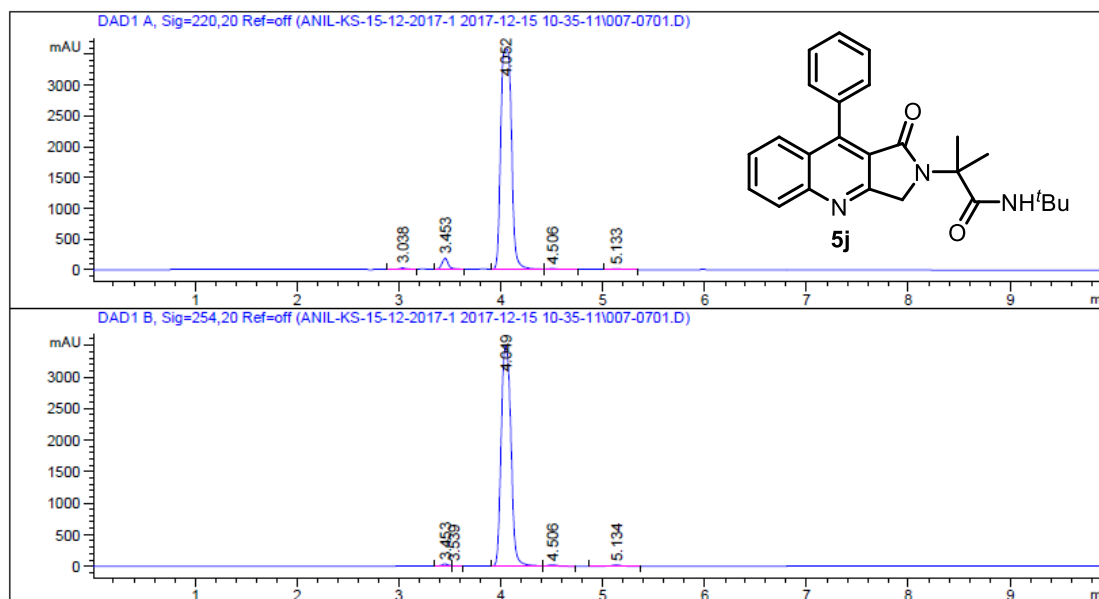

| Peak # | RetTime [min] | Type | Width [min] | Area [mAU*s] | Height [mAU] | Area %  |
|--------|---------------|------|-------------|--------------|--------------|---------|
| 1      | 3.038         | VV   | 0.0996      | 159.76851    | 23.40314     | 0.5866  |
| 2      | 3.453         | VV   | 0.0692      | 812.05127    | 178.08176    | 2.9817  |
| 3      | 4.052         | BV   | 0.1172      | 2.60986e4    | 3574.22852   | 95.8305 |
| 4      | 4.506         | VB   | 0.0916      | 83.07650     | 13.92503     | 0.3050  |
| 5      | 5.133         | VB   | 0.0903      | 80.64246     | 13.76763     | 0.2961  |

Totals : 2.72341e4 3803.40607

Signal 2: DAD1 B, Sig=254,20 Ref=off

| Peak # | RetTime [min] | Type | Width [min] | Area [mAU*s] | Height [mAU] | Area %  |
|--------|---------------|------|-------------|--------------|--------------|---------|
| 1      | 3.453         | BV   | 0.0658      | 135.58652    | 31.73555     | 0.5782  |
| 2      | 3.539         | VB   | 0.0483      | 19.77046     | 6.36127      | 0.0843  |
| 3      | 4.049         | BV   | 0.1089      | 2.30717e4    | 3501.33618   | 98.3828 |
| 4      | 4.506         | VB   | 0.0897      | 115.86201    | 19.96015     | 0.4941  |
| 5      | 5.134         | BB   | 0.0916      | 108.02787    | 18.10634     | 0.4607  |

Totals : 2.34510e4 3577.49950

# Figure S81. HPLC of compound 5k

Data File C:\CHEM32\1\DATA\ANIL-KS-15-12-2017-1 2017-12-15 10-35-11\004-0401.D  
 Sample Name: AG-21-E

```

=====
Acq. Operator   : Dr. Anil Kumar K.S.           Seq. Line :    4
Acq. Instrument : Instrument 1                   Location  : Vial 4
Injection Date  : 12/15/2017 11:12:59 AM       Inj       :    1
                                                    Inj Volume: 3.000 µl
Acq. Method     : C:\CHEM32\1\DATA\ANIL-KS-15-12-2017-1 2017-12-15 10-35-11\ACN-WATER-90-10.M
Last changed    : 12/15/2017 10:35:01 AM by Dr. Anil Kumar K.S.
Analysis Method : C:\CHEM32\1\METHODS\ACN-WATER-90-10.M
Last changed    : 12/15/2017 10:35:01 AM by Dr. Anil Kumar K.S.
Method Info     : OSDD
  
```

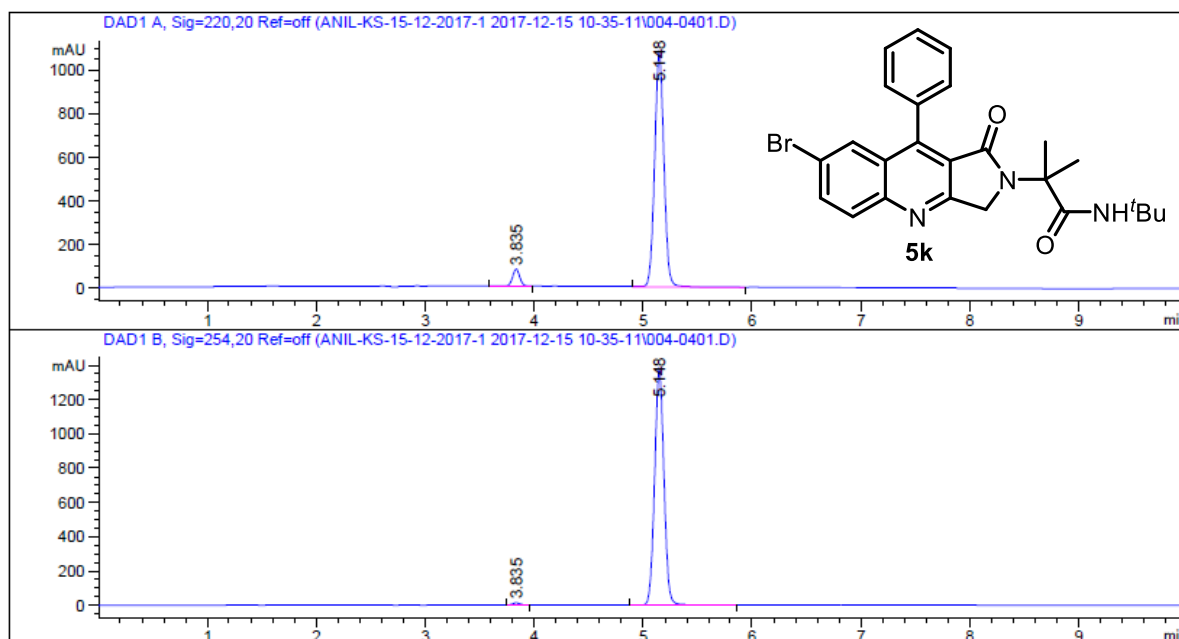

| Peak # | RetTime [min] | Type | Width [min] | Area [mAU*s] | Height [mAU] | Area %  |
|--------|---------------|------|-------------|--------------|--------------|---------|
| 1      | 3.835         | VV   | 0.0767      | 397.71454    | 78.99175     | 5.8764  |
| 2      | 5.148         | VV   | 0.0911      | 6370.28857   | 1075.61047   | 94.1236 |

Totals : 6768.00311 1154.60223

Signal 2: DAD1 B, Sig=254,20 Ref=off

| Peak # | RetTime [min] | Type | Width [min] | Area [mAU*s] | Height [mAU] | Area %  |
|--------|---------------|------|-------------|--------------|--------------|---------|
| 1      | 3.835         | VV   | 0.0721      | 62.74902     | 13.53850     | 0.7582  |
| 2      | 5.148         | BB   | 0.0915      | 8212.81348   | 1377.84229   | 99.2418 |

Totals : 8275.56250 1391.38078

## Figure S82. HPLC of compound 5I

Data File C:\CHEM32\1\DATA\ANIL-KS-15-12-2017-2 2017-12-15 12-51-34\015-0701.D  
 Sample Name: AG-18-E

```

=====
Acq. Operator   : Dr. Anil Kumar K.S.           Seq. Line :    7
Acq. Instrument : Instrument 1                  Location  : Vial 15
Injection Date  : 12/15/2017 2:05:15 PM        Inj       :    1
                                           Inj Volume: 3.000 µl
Acq. Method     : C:\CHEM32\1\DATA\ANIL-KS-15-12-2017-2 2017-12-15 12-51-34\ACN-WATER-90-10.M
Last changed    : 12/15/2017 10:35:01 AM by Dr. Anil Kumar K.S.
Analysis Method : C:\CHEM32\1\METHODS\ACN-WATER-90-10.M
Last changed    : 12/15/2017 10:35:01 AM by Dr. Anil Kumar K.S.
Method Info     : OSDD
  
```

Additional Info : Peak(s) manually integrated

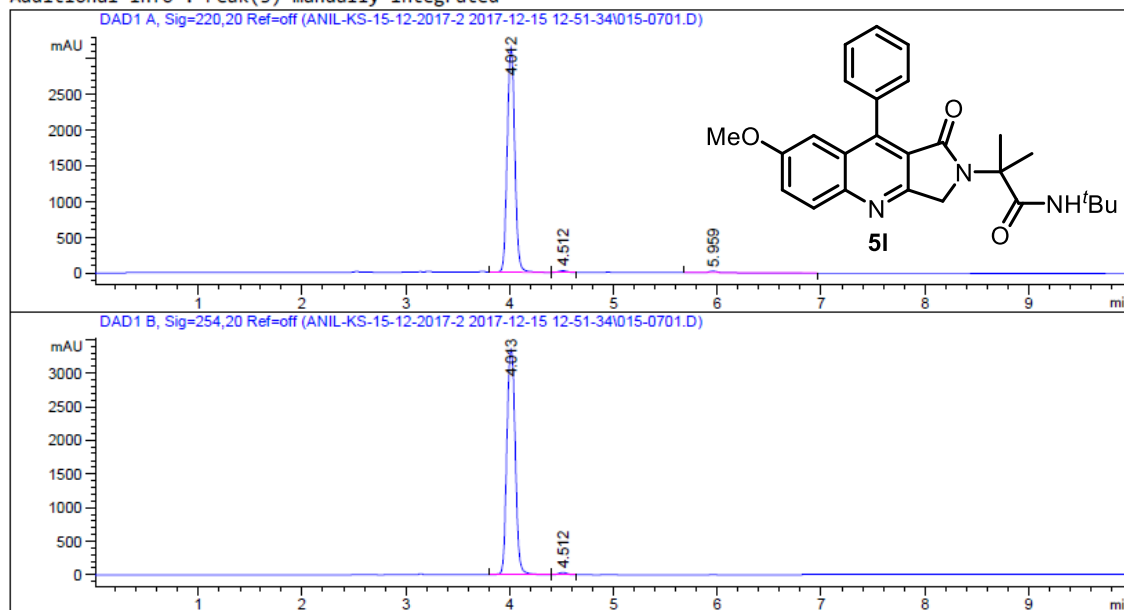

Signal 1: DAD1 A, Sig=220,20 Ref=off

| Peak # | RetTime [min] | Type | Width [min] | Area [mAU*s] | Height [mAU] | Area %  |
|--------|---------------|------|-------------|--------------|--------------|---------|
| 1      | 4.012         | VV   | 0.0814      | 1.59636e4    | 3137.04468   | 98.1641 |
| 2      | 4.512         | VB   | 0.0835      | 135.55725    | 25.69749     | 0.8336  |
| 3      | 5.959         | BB   | 0.1036      | 162.99409    | 23.30471     | 1.0023  |

Totals : 1.62622e4 3186.04688

Signal 2: DAD1 B, Sig=254,20 Ref=off

| Peak # | RetTime [min] | Type | Width [min] | Area [mAU*s] | Height [mAU] | Area %  |
|--------|---------------|------|-------------|--------------|--------------|---------|
| 1      | 4.013         | VV   | 0.0917      | 1.88305e4    | 3343.33594   | 99.0521 |
| 2      | 4.512         | VB   | 0.0840      | 180.20427    | 33.89356     | 0.9479  |

Totals : 1.90107e4 3377.22950

# Figure S83. HPLC of compound 5m

Data File C:\CHEM32\1\DATA\FARHEEN-09-05-2019-1 2019-05-09 21-57-41\045-0101.D  
 Sample Name: S-019-0009

```

=====
Acq. Operator   : Dr. Anil Kumar K.S.           Seq. Line :    1
Acq. Instrument : Instrument 1                   Location  : Vial 45
Injection Date  : 5/9/2019 9:59:24 PM          Inj       :    1
                                                    Inj Volume: 4.000 µl
Acq. Method    : C:\CHEM32\1\DATA\FARHEEN-09-05-2019-1 2019-05-09 21-57-41\ACN-WATER-90-10.M
Last changed   : 5/3/2019 10:08:39 AM by Dr. Anil Kumar K.S.
Analysis Method: C:\CHEM32\1\DATA\FARHEEN-09-05-2019-2 2019-05-09 23-31-20\METH-WATER-90-10-NEW.M
Last changed   : 4/29/2019 11:34:05 AM by Dr. Anil Kumar K.S.
Method Info    : OSDD
  
```

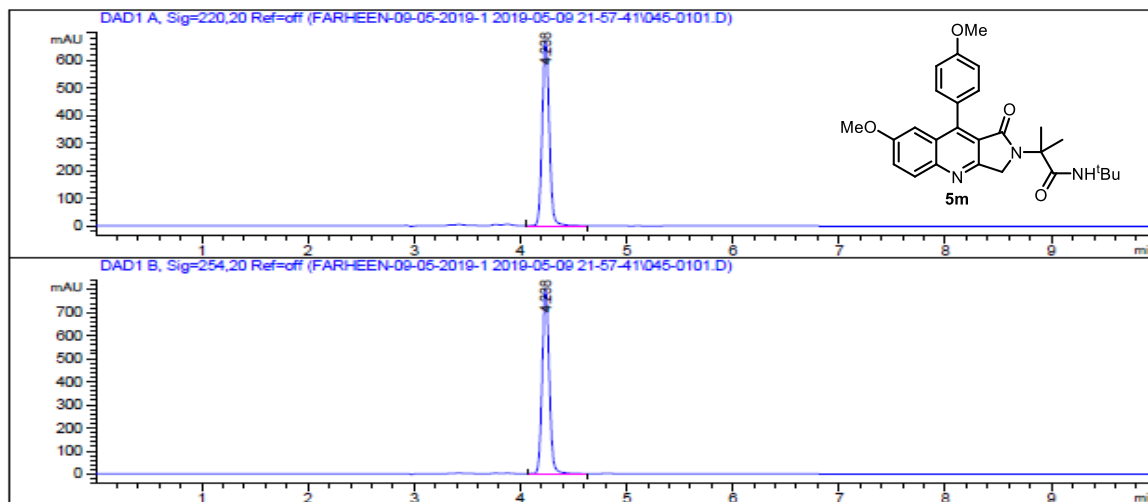

=====  
 Area Percent Report  
 =====

```

Sorted By      : Signal
Multiplier     : 1.0000
Dilution      : 1.0000
Use Multiplier & Dilution Factor with ISTDs
  
```

Signal 1: DAD1 A, Sig=220,20 Ref=off

| Peak # | RetTime [min] | Type | Width [min] | Area [mAU*s] | Height [mAU] | Area %   |
|--------|---------------|------|-------------|--------------|--------------|----------|
| 1      | 4.238         | BB   | 0.0720      | 3103.95850   | 670.56421    | 100.0000 |

Totals :                                    3103.95850   670.56421

Instrument 1 5/10/2019 3:05:47 AM Dr. Anil Kumar K.S.

Page 1 of 2

Signal 2: DAD1 B, Sig=254,20 Ref=off

| Peak # | RetTime [min] | Type | Width [min] | Area [mAU*s] | Height [mAU] | Area %   |
|--------|---------------|------|-------------|--------------|--------------|----------|
| 1      | 4.238         | W    | 0.0720      | 3719.73022   | 802.90283    | 100.0000 |

Totals :                                    3719.73022   802.90283

# Figure S84. HPLC of compound 5n

Data File C:\CHEM32\1\DATA\FARHEEN-07-01-2019-1 2019-01-07 10-25-48\039-0501.D  
 Sample Name: S-019-0006

```

=====
Acq. Operator   : Dr. Anil Kumar K.S.           Seq. Line :    5
Acq. Instrument : Instrument 1                  Location  : Vial 39
Injection Date  : 1/7/2019 11:13:01 AM         Inj       :    1
                                                    Inj Volume: 5.000 µl
Method         : C:\CHEM32\1\DATA\FARHEEN-07-01-2019-1 2019-01-07 10-25-48\ACN-WATER-90-10.M
                (Sequence Method)
Last changed   : 12/12/2018 12:04:34 PM by Dr. Anil Kumar K.S.
=====
  
```

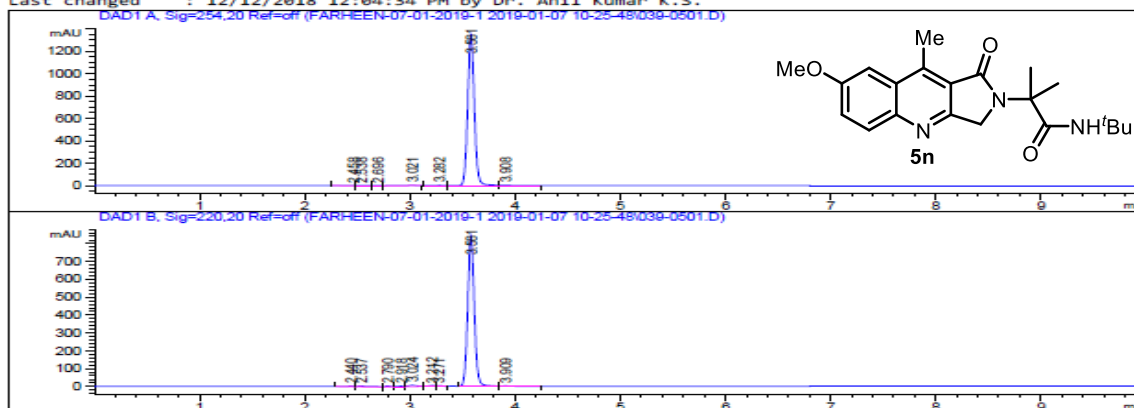

## Area Percent Report

```

Sorted By      : Signal
Multiplier     : 1.0000
Dilution       : 1.0000
Use Multiplier & Dilution Factor with ISTDs
  
```

Signal 1: DAD1 A, Sig=254,20 Ref=off

| Peak #   | RetTime [min] | Type | Width [min] | Area [mAU*s] | Height [mAU] | Area %  |
|----------|---------------|------|-------------|--------------|--------------|---------|
| 1        | 2.458         | BV   | 0.0836      | 7.30253      | 1.33934      | 0.1213  |
| 2        | 2.538         | VV   | 0.0748      | 14.82715     | 2.84650      | 0.2464  |
| 3        | 2.696         | VB   | 0.0722      | 6.17382      | 1.32817      | 0.1026  |
| 4        | 3.021         | BB   | 0.0932      | 24.08361     | 3.54556      | 0.4002  |
| 5        | 3.282         | BV   | 0.0725      | 9.51162      | 1.96451      | 0.1581  |
| 6        | 3.581         | VV   | 0.0697      | 5925.78467   | 1338.45410   | 98.4701 |
| 7        | 3.908         | VB   | 0.0911      | 30.17077     | 4.68942      | 0.5014  |
| Totals : |               |      |             | 6017.85417   | 1354.16760   |         |

Instrument 1 1/7/2019 12:21:48 PM Dr. Anil Kumar K.S.

Page 1 of 2

Signal 2: DAD1 B, Sig=220,20 Ref=off

| Peak #   | RetTime [min] | Type | Width [min] | Area [mAU*s] | Height [mAU] | Area %  |
|----------|---------------|------|-------------|--------------|--------------|---------|
| 1        | 2.440         | BV   | 0.0974      | 14.80971     | 2.29225      | 0.3856  |
| 2        | 2.537         | VB   | 0.1279      | 34.53092     | 3.53680      | 0.8991  |
| 3        | 2.790         | BV   | 0.0656      | 17.40842     | 4.09395      | 0.4533  |
| 4        | 2.918         | W    | 0.0774      | 15.77617     | 2.81533      | 0.4108  |
| 5        | 3.024         | W    | 0.0830      | 44.95138     | 7.60114      | 1.1705  |
| 6        | 3.212         | W    | 0.0736      | 26.98288     | 5.27958      | 0.7026  |
| 7        | 3.271         | VB   | 0.0509      | 12.80687     | 3.83900      | 0.3335  |
| 8        | 3.581         | BV   | 0.0689      | 3655.98633   | 837.20837    | 95.1975 |
| 9        | 3.909         | VB   | 0.0964      | 17.17186     | 2.49043      | 0.4471  |
| Totals : |               |      |             | 3840.42453   | 869.15685    |         |

## Figure S85. HPLC of compound 5o

Data File C:\CHEM32\1\DATA\ANIL-KS-15-12-2017-2 2017-12-15 12-51-34\013-0501.D

Sample Name: AG-18-F

```

=====
Acq. Operator   : Dr. Anil Kumar K.S.           Seq. Line :    5
Acq. Instrument : Instrument 1                   Location  : Vial 13
Injection Date  : 12/15/2017 1:41:18 PM        Inj       :    1
                                                    Inj Volume: 3.000 µl
Acq. Method    : C:\CHEM32\1\DATA\ANIL-KS-15-12-2017-2 2017-12-15 12-51-34\ACN-WATER-90-10.M
Last changed   : 12/15/2017 10:35:01 AM by Dr. Anil Kumar K.S.
Analysis Method: C:\CHEM32\1\METHODS\ACN-WATER-90-10.M
Last changed   : 12/15/2017 10:35:01 AM by Dr. Anil Kumar K.S.
Method Info    : OSDD
    
```

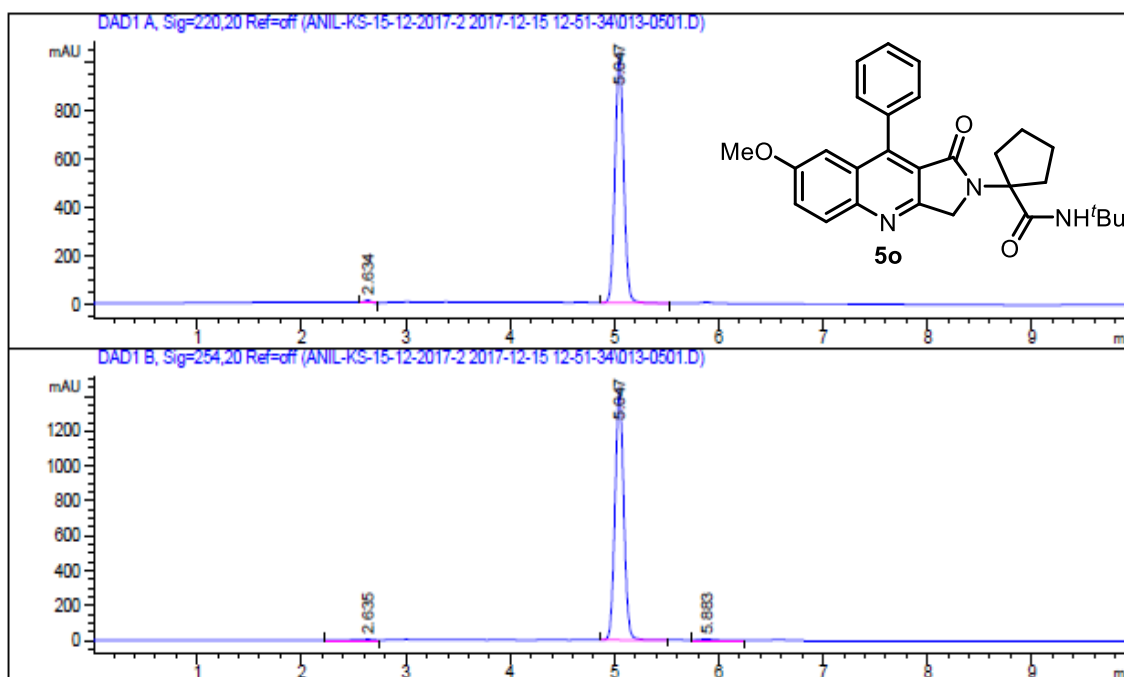

| Peak # | RetTime [min] | Type | Width [min] | Area [mAU*s] | Height [mAU] | Area %  |
|--------|---------------|------|-------------|--------------|--------------|---------|
| 1      | 2.634         | VB   | 0.0706      | 60.06581     | 12.38757     | 0.9960  |
| 2      | 5.047         | BV   | 0.0899      | 5970.51514   | 1026.19019   | 99.0040 |

Totals : 6030.58094 1038.57775

Signal 2: DAD1 B, Sig=254,20 Ref=off

| Peak # | RetTime [min] | Type | Width [min] | Area [mAU*s] | Height [mAU] | Area %  |
|--------|---------------|------|-------------|--------------|--------------|---------|
| 1      | 2.635         | BB   | 0.0751      | 27.41661     | 5.23576      | 0.3252  |
| 2      | 5.047         | BV   | 0.0901      | 8365.23145   | 1434.04065   | 99.2327 |
| 3      | 5.883         | BB   | 0.1008      | 37.26209     | 5.66331      | 0.4420  |

Totals : 8429.91014 1444.93972



## Figure S86. HPLC of compound 5p

Data File C:\CHEM32\1\DATA\ANIL-KS-15-12-2017-2 2017-12-15 12-51-34\010-0201.D

Sample Name: A9-19-A

```
=====
Acq. Operator   : Dr. Anil Kumar K.S.           Seq. Line :    2
Acq. Instrument : Instrument 1                  Location  : Vial 10
Injection Date  : 12/15/2017 1:05:27 PM       Inj       :    1
                                                    Inj Volume: 3.000 µl
Acq. Method     : C:\CHEM32\1\DATA\ANIL-KS-15-12-2017-2 2017-12-15 12-51-34\ACN-WATER-90-10.M
Last changed    : 12/15/2017 10:35:01 AM by Dr. Anil Kumar K.S.
Analysis Method : C:\CHEM32\1\METHODS\ACN-WATER-90-10.M
Last changed    : 12/15/2017 10:35:01 AM by Dr. Anil Kumar K.S.
Method Info     : OSDD
```

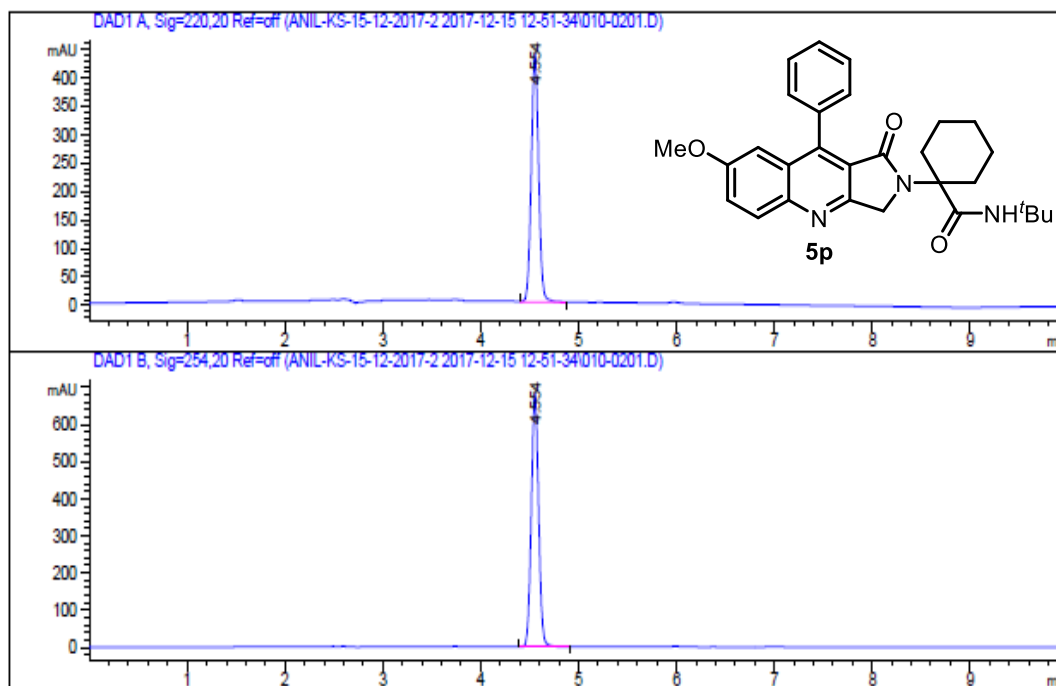

| Peak # | RetTime [min] | Type | Width [min] | Area [mAU*s] | Height [mAU] | Area %   |
|--------|---------------|------|-------------|--------------|--------------|----------|
| 1      | 4.554         | WV   | 0.0810      | 2280.25098   | 435.94400    | 100.0000 |

Totals :                      2280.25098   435.94400

Signal 2: DAD1 B, Sig=254,20 Ref=off

| Peak # | RetTime [min] | Type | Width [min] | Area [mAU*s] | Height [mAU] | Area %   |
|--------|---------------|------|-------------|--------------|--------------|----------|
| 1      | 4.554         | BB   | 0.0805      | 3534.63086   | 681.92010    | 100.0000 |

Totals :                      3534.63086   681.92010

# Figure S87. HPLC of compound 6a

Data File C:\CHEM32\1\DATA\ANIL-KS-15-12-2017-2 2017-12-15 12-51-34\016-0801.D  
 Sample Name: AG-21-A-P

```

=====
Acq. Operator   : Dr. Anil Kumar K.S.           Seq. Line :    8
Acq. Instrument : Instrument 1                   Location  : Vial 16
Injection Date  : 12/15/2017 2:17:15 PM        Inj       :    1
                                           Inj Volume: 3.000 µl

Acq. Method    : C:\CHEM32\1\DATA\ANIL-KS-15-12-2017-2 2017-12-15 12-51-34\ACN-WATER-90-10.M
Last changed   : 12/15/2017 10:35:01 AM by Dr. Anil Kumar K.S.
Analysis Method : C:\CHEM32\1\METHODS\ACN-WATER-90-10.M
Last changed   : 12/15/2017 10:35:01 AM by Dr. Anil Kumar K.S.
Method Info    : OSOD
  
```

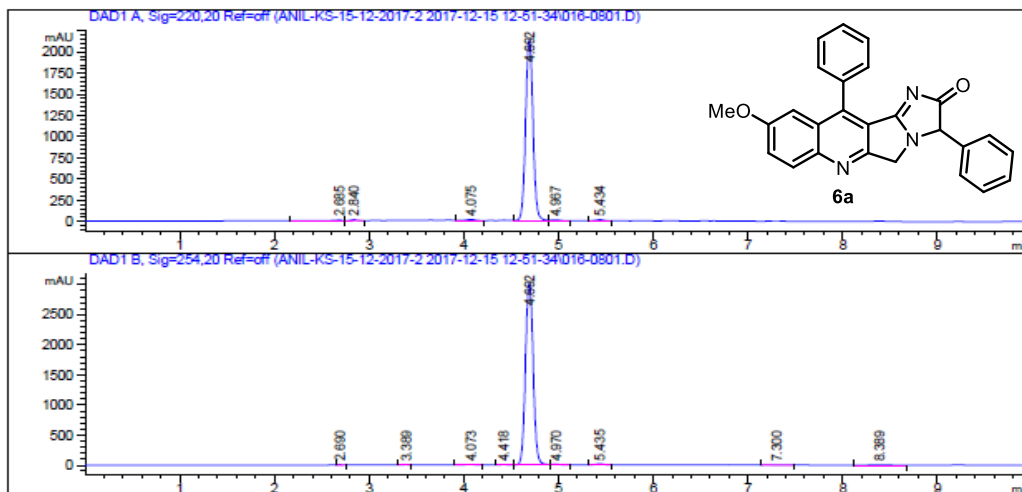

| Peak # | RetTime [min] | Type | Width [min] | Area [mAU*s] | Height [mAU] | Area %  |
|--------|---------------|------|-------------|--------------|--------------|---------|
| 1      | 2.685         | VB   | 0.1152      | 103.02876    | 11.87425     | 0.8617  |
| 2      | 2.840         | BV   | 0.0778      | 72.20421     | 14.08029     | 0.6039  |
| 3      | 4.075         | VB   | 0.0975      | 96.57744     | 14.52980     | 0.8078  |
| 4      | 4.692         | VV   | 0.0829      | 1.15376e4    | 2138.82104   | 96.4997 |
| 5      | 4.967         | VB   | 0.0989      | 66.05271     | 10.01547     | 0.5525  |
| 6      | 5.434         | BV   | 0.0908      | 80.64073     | 13.67817     | 0.6745  |

Totals : 1.19561e4 2202.99903

Signal 2: DAD1 B, Sig=254,20 Ref=off

| Peak # | RetTime [min] | Type | Width [min] | Area [mAU*s] | Height [mAU] | Area %  |
|--------|---------------|------|-------------|--------------|--------------|---------|
| 1      | 2.690         | VB   | 0.0519      | 27.11286     | 7.93599      | 0.1541  |
| 2      | 3.389         | BV   | 0.0654      | 24.60736     | 5.81327      | 0.1399  |
| 3      | 4.073         | BB   | 0.0933      | 59.43724     | 9.45979      | 0.3378  |
| 4      | 4.418         | VV   | 0.0830      | 38.43474     | 7.11383      | 0.2185  |
| 5      | 4.692         | VV   | 0.0901      | 1.71339e4    | 3022.39673   | 97.3911 |
| 6      | 4.970         | VB   | 0.0948      | 83.26785     | 12.98086     | 0.4733  |
| 7      | 5.435         | BV   | 0.0912      | 132.75661    | 22.39119     | 0.7546  |
| 8      | 7.300         | BV   | 0.1195      | 41.14302     | 5.36498      | 0.2339  |
| 9      | 8.389         | BV   | 0.1298      | 52.21698     | 6.23127      | 0.2968  |

Totals : 1.75929e4 3099.68791

## Figure S88. HPLC of compound 6b

Data File C:\CHEM32\1\DATA\ANIL-KS-15-12-2017-2 2017-12-15 12-51-34\014-0601.D

Sample Name: AG-16-B-P

```

=====
Acq. Operator   : Dr. Anil Kumar K.S.          Seq. Line :    6
Acq. Instrument : Instrument 1                 Location  : Vial 14
Injection Date  : 12/15/2017 1:53:16 PM      Inj       :    1
                                                Inj Volume: 3.000 µl
Acq. Method    : C:\CHEM32\1\DATA\ANIL-KS-15-12-2017-2 2017-12-15 12-51-34\ACN-WATER-90-10.M
Last changed   : 12/15/2017 10:35:01 AM by Dr. Anil Kumar K.S.
Analysis Method: C:\CHEM32\1\METHODS\ACN-WATER-90-10.M
Last changed   : 12/15/2017 10:35:01 AM by Dr. Anil Kumar K.S.
Method Info    : OSDD
    
```

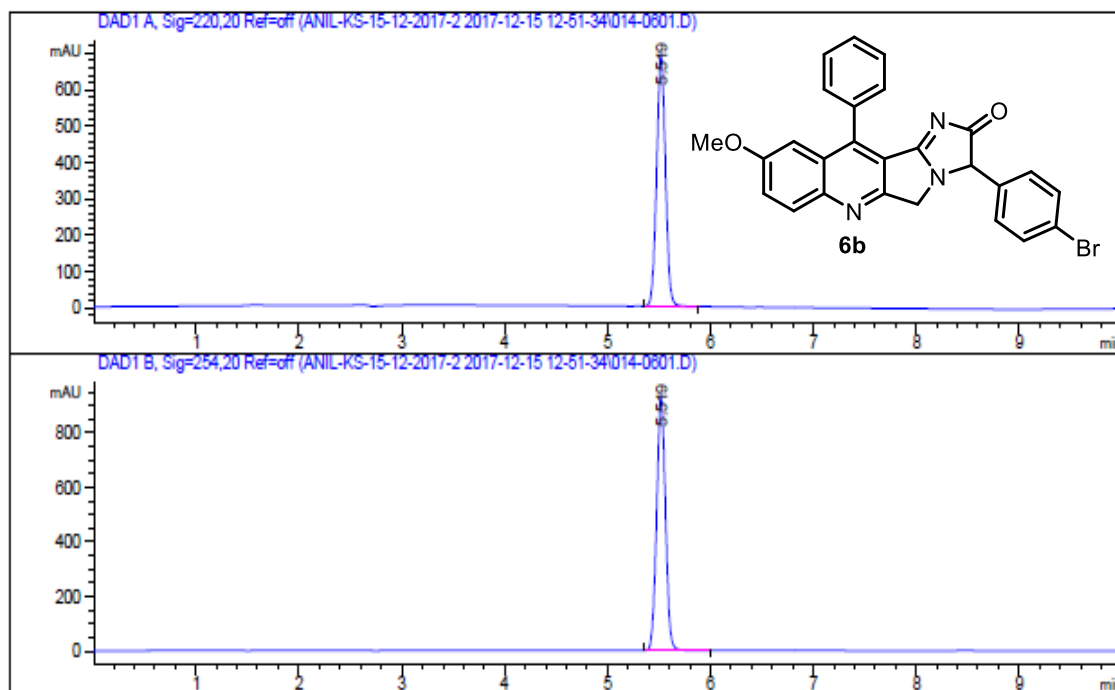

| Peak # | RetTime [min] | Type | Width [min] | Area [mAU*s] | Height [mAU] | Area %   |
|--------|---------------|------|-------------|--------------|--------------|----------|
| 1      | 5.519         | W    | 0.0919      | 4149.05469   | 692.43347    | 100.0000 |

Totals : 4149.05469 692.43347

Signal 2: DAD1 B, Sig=254,20 Ref=off

| Peak # | RetTime [min] | Type | Width [min] | Area [mAU*s] | Height [mAU] | Area %   |
|--------|---------------|------|-------------|--------------|--------------|----------|
| 1      | 5.519         | W    | 0.0920      | 5610.87549   | 935.17145    | 100.0000 |

Totals : 5610.87549 935.17145

## Figure S89. HPLC of compound 6c

Data File C:\CHEM32\1\DATA\ANIL-KS-15-12-2017-2 2017-12-15 12-51-34\020-1201.D  
 Sample Name: AG-18-B-P

```

=====
Acq. Operator   : Dr. Anil Kumar K.S.           Seq. Line :   12
Acq. Instrument : Instrument 1                  Location  : Vial 20
Injection Date  : 12/15/2017 3:05:20 PM        Inj       :    1
                                                    Inj Volume: 3.000 µl

Acq. Method    : C:\CHEM32\1\DATA\ANIL-KS-15-12-2017-2 2017-12-15 12-51-34\ACN-WATER-90-10.M
Last changed   : 12/15/2017 10:35:01 AM by Dr. Anil Kumar K.S.
Analysis Method : C:\CHEM32\1\METHODS\ACN-WATER-90-10.M
Last changed   : 12/15/2017 10:35:01 AM by Dr. Anil Kumar K.S.
Method Info    : OSDD
  
```

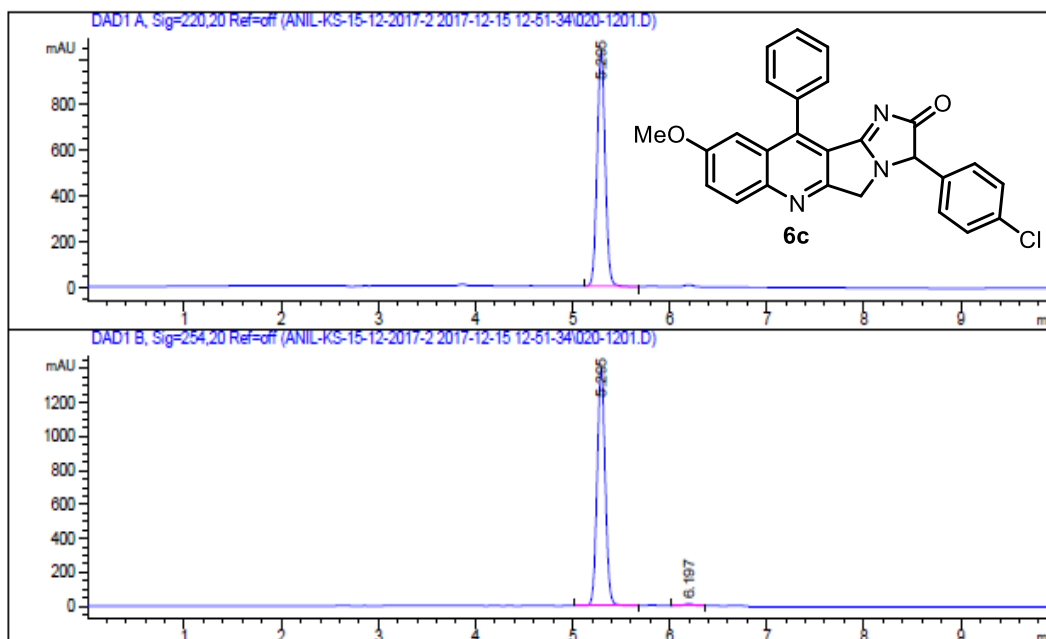

| Peak # | RetTime [min] | Type | Width [min] | Area [mAU*s] | Height [mAU] | Area %   |
|--------|---------------|------|-------------|--------------|--------------|----------|
| 1      | 5.295         | VB   | 0.0898      | 5982.72314   | 1029.17029   | 100.0000 |

Totals : 5982.72314 1029.17029

Signal 2: DAD1 B, Sig=254,20 Ref=off

| Peak # | RetTime [min] | Type | Width [min] | Area [mAU*s] | Height [mAU] | Area %  |
|--------|---------------|------|-------------|--------------|--------------|---------|
| 1      | 5.295         | BV   | 0.0900      | 8163.41992   | 1400.07507   | 99.0790 |
| 2      | 6.197         | BB   | 0.1009      | 75.88558     | 11.81718     | 0.9210  |

Totals : 8239.30550 1411.89225

## Figure S90. HPLC of compound 6d

Data File C:\CHEM32\1\DATA\ANIL-KS-15-12-2017-2 2017-12-15 12-51-34\019-1101.D  
 Sample Name: AG-18-C-P

```

=====
Acq. Operator   : Dr. Anil Kumar K.S.           Seq. Line :   11
Acq. Instrument : Instrument 1                  Location  : Vial 19
Injection Date  : 12/15/2017 2:53:18 PM        Inj       :    1
                                           Inj Volume: 3.000 µl

Acq. Method    : C:\CHEM32\1\DATA\ANIL-KS-15-12-2017-2 2017-12-15 12-51-34\ACN-WATER-90-10.M
Last changed   : 12/15/2017 10:35:01 AM by Dr. Anil Kumar K.S.
Analysis Method: C:\CHEM32\1\METHODS\ACN-WATER-90-10.M
Last changed   : 12/15/2017 10:35:01 AM by Dr. Anil Kumar K.S.
Method Info    : OSDD
  
```

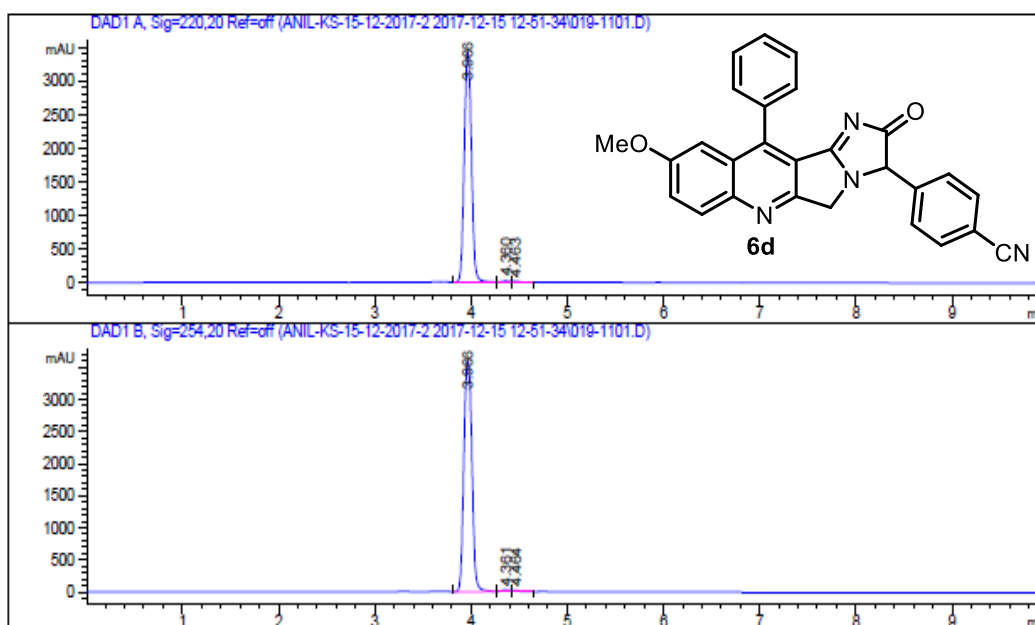

| Peak # | RetTime [min] | Type | Width [min] | Area [mAU*s] | Height [mAU] | Area %  |
|--------|---------------|------|-------------|--------------|--------------|---------|
| 1      | 3.966         | BB   | 0.0849      | 1.78302e4    | 3417.97974   | 99.1765 |
| 2      | 4.360         | BV   | 0.0777      | 89.34116     | 17.44733     | 0.4969  |
| 3      | 4.463         | VB   | 0.0752      | 58.70437     | 11.97353     | 0.3265  |

Totals : 1.79783e4 3447.40060

Signal 2: DAD1 B, Sig=254,20 Ref=off

| Peak # | RetTime [min] | Type | Width [min] | Area [mAU*s] | Height [mAU] | Area %  |
|--------|---------------|------|-------------|--------------|--------------|---------|
| 1      | 3.966         | BB   | 0.0958      | 2.08845e4    | 3593.79395   | 99.0360 |
| 2      | 4.361         | BV   | 0.0770      | 113.42193    | 22.41887     | 0.5379  |
| 3      | 4.464         | VB   | 0.0769      | 89.86758     | 17.79210     | 0.4262  |

Totals : 2.10878e4 3634.00492

## Figure S91. HPLC of compound 6e

Data File C:\CHEM32\1\DATA\ANIL-KS-15-12-2017-2 2017-12-15 12-51-34\021-1301.D  
 Sample Name: AG-18-A-P

```

=====
Acq. Operator   : Dr. Anil Kumar K.S.           Seq. Line :   13
Acq. Instrument : Instrument 1                  Location  : Vial 21
Injection Date  : 12/15/2017 3:17:17 PM       Inj       :    1
                                                    Inj Volume: 3.000 µl

Acq. Method    : C:\CHEM32\1\DATA\ANIL-KS-15-12-2017-2 2017-12-15 12-51-34\ACN-WATER-90-10.M
Last changed   : 12/15/2017 10:35:01 AM by Dr. Anil Kumar K.S.
Analysis Method : C:\CHEM32\1\METHODS\ACN-WATER-90-10.M
Last changed   : 12/15/2017 10:35:01 AM by Dr. Anil Kumar K.S.
Method Info    : OSDD
  
```

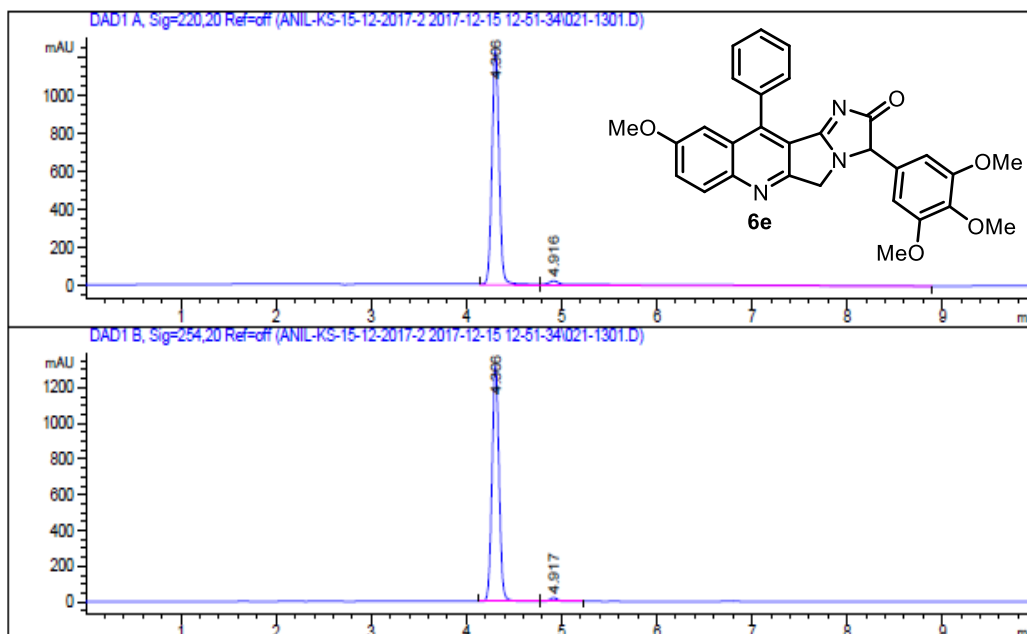

| Peak # | RetTime [min] | Type | Width [min] | Area [mAU*s] | Height [mAU] | Area %  |
|--------|---------------|------|-------------|--------------|--------------|---------|
| 1      | 4.306         | WV   | 0.0817      | 6547.84961   | 1237.75269   | 90.0686 |
| 2      | 4.916         | VB   | 0.3824      | 721.99658    | 23.37426     | 9.9314  |

Totals : 7269.84619 1261.12694

Signal 2: DAD1 B, Sig=254,20 Ref=off

| Peak # | RetTime [min] | Type | Width [min] | Area [mAU*s] | Height [mAU] | Area %  |
|--------|---------------|------|-------------|--------------|--------------|---------|
| 1      | 4.306         | BV   | 0.0801      | 6823.17090   | 1324.72534   | 98.2684 |
| 2      | 4.917         | WV   | 0.0901      | 120.22906    | 20.59347     | 1.7316  |

Totals : 6943.39996 1345.31881

Figure S92. HPLC of compound **6f**

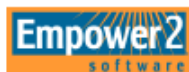

SAF\_CDRI\_GSC and HPLC LAB, LUCKNOW

| SAMPLE INFORMATION |                         |                     |                  |
|--------------------|-------------------------|---------------------|------------------|
| Sample Name:       | AG-21-E-P               | Acquired By:        | System           |
| Sample Type:       | Unknown                 | Acq. Method Set:    | NEW GENERAL HPLC |
| Vial:              | 1                       | Processing Method:  | AG_21_E_P        |
| Injection #:       | 12                      | Channel Name:       | 254.0nm          |
| Injection Volume:  | 10.00 ul                | Proc. Chnl. Descr.: | PDA 254.0 nm     |
| Run Time:          | 30.0 Minutes            |                     |                  |
| Date Acquired:     | 7/1/2020 4:00:45 PM IST |                     |                  |
| Date Processed:    | 7/3/2020 2:35:18 PM IST |                     |                  |

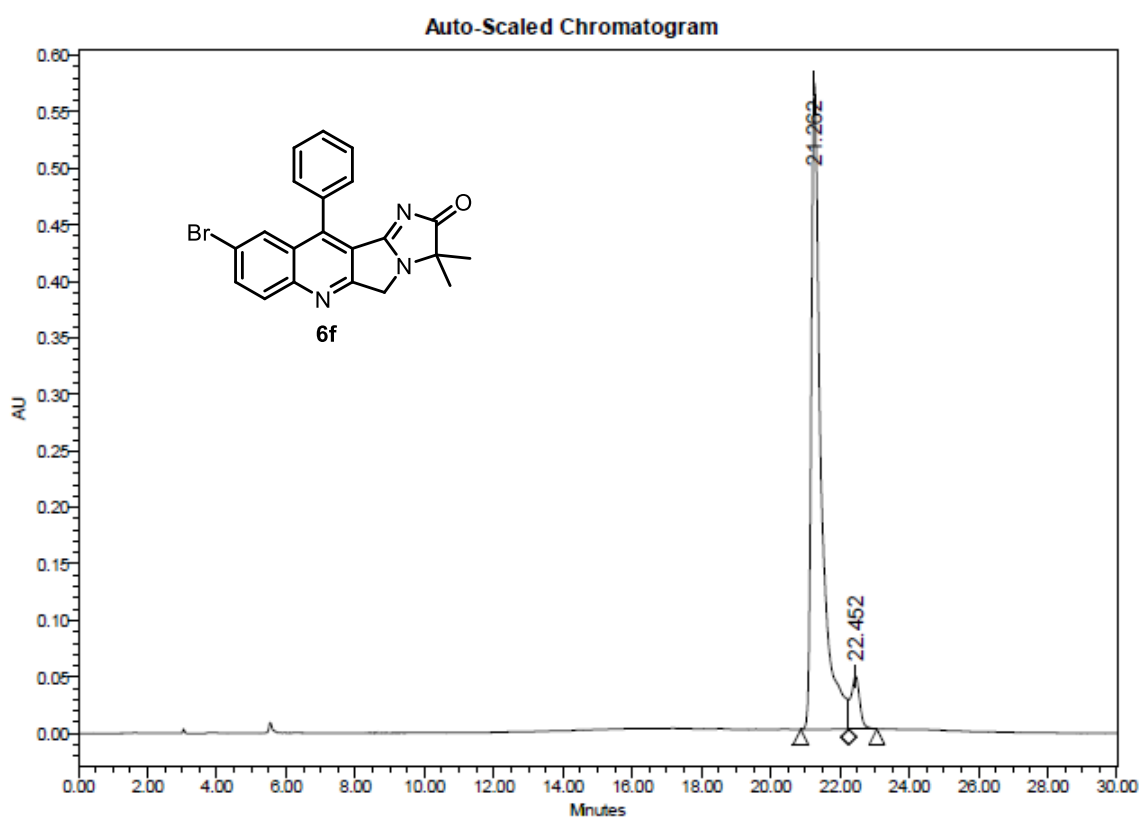

Peak Results

| Name | RT     | Area     | Height | % Area |
|------|--------|----------|--------|--------|
| 1    | 21.262 | 11357125 | 572057 | 93.24  |
| 2    | 22.452 | 823921   | 46776  | 6.76   |

## Figure S93. HPLC of compound 6g

Data File C:\CHEM32\1\DATA\ANIL-KS-15-12-2017-2 2017-12-15 12-51-34\023-1501.D  
 Sample Name: AG-18-E-P

```

=====
Acq. Operator   : Dr. Anil Kumar K.S.           Seq. Line :   15
Acq. Instrument : Instrument 1                  Location  : Vial 23
Injection Date  : 12/15/2017 3:41:13 PM        Inj       :    1
                                                    Inj Volume: 3.000 µl

Acq. Method    : C:\CHEM32\1\DATA\ANIL-KS-15-12-2017-2 2017-12-15 12-51-34\ACN-WATER-90-10.M
Last changed   : 12/15/2017 10:35:01 AM by Dr. Anil Kumar K.S.
Analysis Method : C:\CHEM32\1\METHODS\ACN-WATER-90-10.M
Last changed   : 12/15/2017 10:35:01 AM by Dr. Anil Kumar K.S.
Method Info    : OSDD
  
```

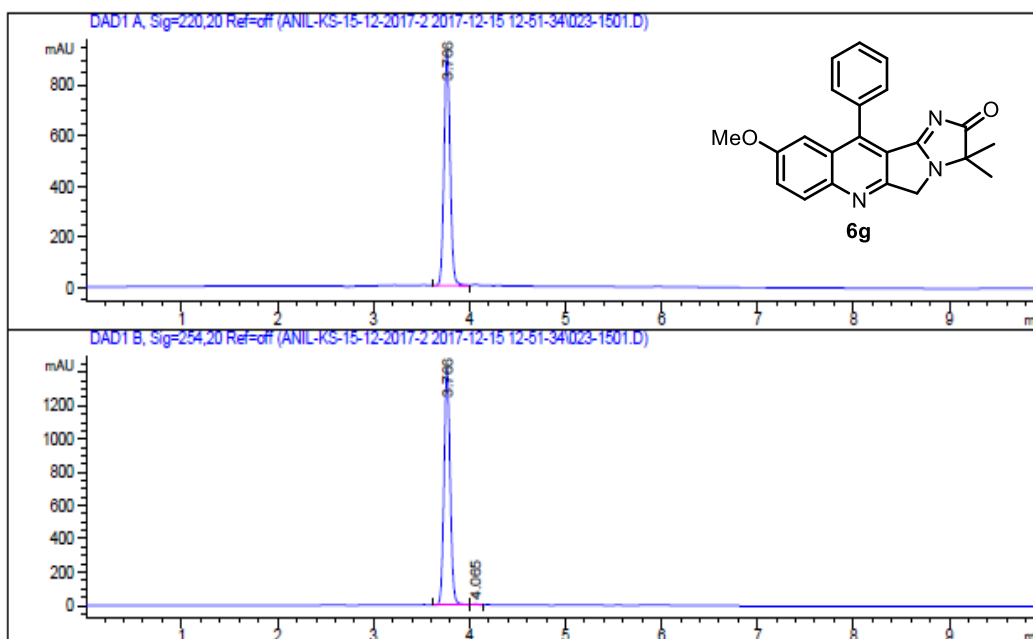

| Peak # | RetTime [min] | Type | Width [min] | Area [mAU*s] | Height [mAU] | Area %   |
|--------|---------------|------|-------------|--------------|--------------|----------|
| 1      | 3.766         | BV   | 0.0679      | 4122.53613   | 927.59344    | 100.0000 |

Totals : 4122.53613 927.59344

Signal 2: DAD1 B, Sig=254,20 Ref=off

| Peak # | RetTime [min] | Type | Width [min] | Area [mAU*s] | Height [mAU] | Area %  |
|--------|---------------|------|-------------|--------------|--------------|---------|
| 1      | 3.766         | BV   | 0.0680      | 6352.28467   | 1425.41724   | 99.4520 |
| 2      | 4.065         | WV   | 0.0760      | 35.00503     | 6.80146      | 0.5480  |

Totals : 6387.28970 1432.21870



## Figure S94. HPLC of compound 6h

Data File C:\CHEM32\1\DATA\ANIL-KS-15-12-2017-2 2017-12-15 12-51-34\018-1001.D

Sample Name: AG-18-F-P

```

=====
Acq. Operator   : Dr. Anil Kumar K.S.           Seq. Line : 10
Acq. Instrument : Instrument 1                  Location  : Vial 18
Injection Date  : 12/15/2017 2:41:15 PM        Inj       : 1
                                           Inj Volume: 3.000 µl

Acq. Method     : C:\CHEM32\1\DATA\ANIL-KS-15-12-2017-2 2017-12-15 12-51-34\ACN-WATER-90-10.M
Last changed    : 12/15/2017 10:35:01 AM by Dr. Anil Kumar K.S.
Analysis Method : C:\CHEM32\1\METHODS\ACN-WATER-90-10.M
Last changed    : 12/15/2017 10:35:01 AM by Dr. Anil Kumar K.S.
Method Info     : OSDD
    
```

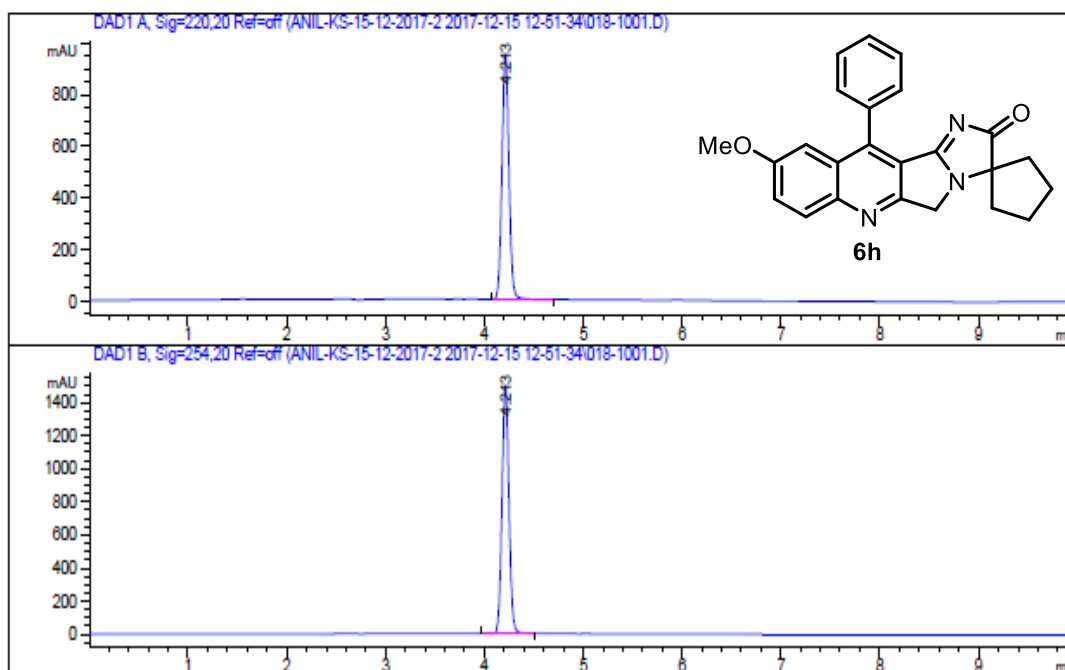

| Peak # | RetTime [min] | Type | Width [min] | Area [mAU*s] | Height [mAU] | Area %   |
|--------|---------------|------|-------------|--------------|--------------|----------|
| 1      | 4.213         | WV   | 0.0774      | 4691.17920   | 954.21094    | 100.0000 |

Totals : 4691.17920 954.21094

Signal 2: DAD1 B, Sig=254,20 Ref=off

| Peak # | RetTime [min] | Type | Width [min] | Area [mAU*s] | Height [mAU] | Area %   |
|--------|---------------|------|-------------|--------------|--------------|----------|
| 1      | 4.213         | BV   | 0.0771      | 7372.19385   | 1505.42444   | 100.0000 |

Totals : 7372.19385 1505.42444

## Figure S95. HPLC of compound **6i**

Data File C:\CHEM32\1\DATA\ANIL-KS-15-12-2017-2 2017-12-15 12-51-34\017-0901.D  
 Sample Name: AG-19-A-P

```

=====
Acq. Operator   : Dr. Anil Kumar K.S.          Seq. Line :    9
Acq. Instrument : Instrument 1                 Location  : Vial 17
Injection Date  : 12/15/2017 2:29:15 PM       Inj       :    1
                                           Inj Volume: 3.000 µl

Acq. Method    : C:\CHEM32\1\DATA\ANIL-KS-15-12-2017-2 2017-12-15 12-51-34\ACN-WATER-90-10.M
Last changed   : 12/15/2017 10:35:01 AM by Dr. Anil Kumar K.S.
Analysis Method: C:\CHEM32\1\METHODS\ACN-WATER-90-10.M
Last changed   : 12/15/2017 10:35:01 AM by Dr. Anil Kumar K.S.
Method Info    : OSDD
  
```

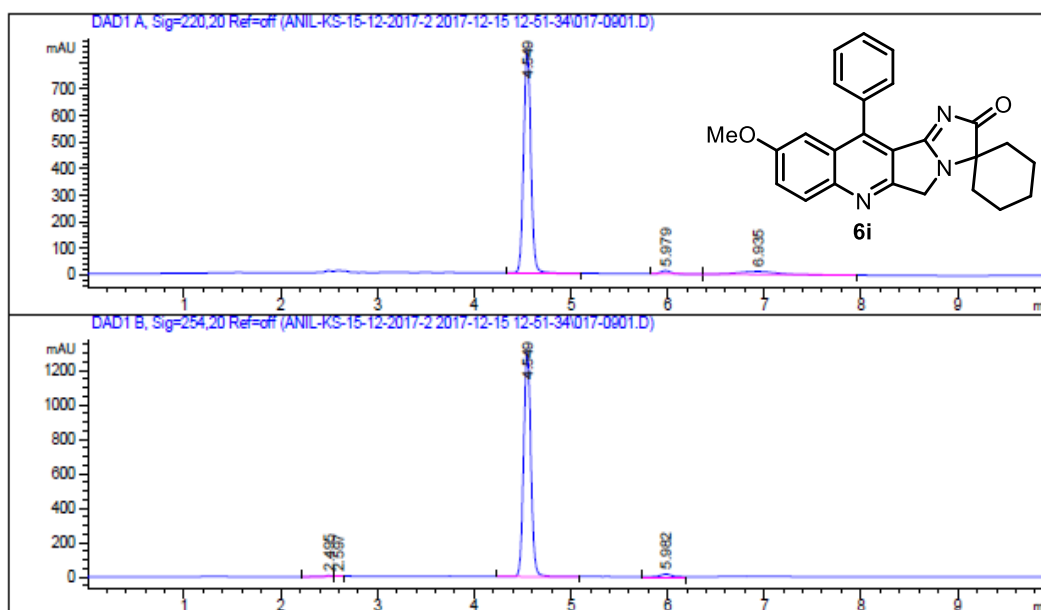

| Peak #   | RetTime [min] | Type | Width [min] | Area [mAU*s] | Height [mAU] | Area %  |
|----------|---------------|------|-------------|--------------|--------------|---------|
| 1        | 4.549         | W    | 0.0830      | 4384.64551   | 837.99878    | 91.5577 |
| 2        | 5.979         | BV   | 0.1083      | 86.36610     | 12.55259     | 1.8034  |
| 3        | 6.935         | VB   | 0.4269      | 317.92987    | 11.48540     | 6.6388  |
| Totals : |               |      |             | 4788.94147   | 862.03677    |         |

Signal 2: DAD1 B, Sig=254,20 Ref=off

| Peak #   | RetTime [min] | Type | Width [min] | Area [mAU*s] | Height [mAU] | Area %  |
|----------|---------------|------|-------------|--------------|--------------|---------|
| 1        | 2.495         | BV   | 0.0704      | 28.29429     | 5.85662      | 0.4061  |
| 2        | 2.597         | W    | 0.0758      | 28.55070     | 5.38616      | 0.4098  |
| 3        | 4.549         | BV   | 0.0828      | 6801.49365   | 1304.23962   | 97.6230 |
| 4        | 5.982         | BB   | 0.1041      | 108.76447    | 16.24367     | 1.5611  |
| Totals : |               |      |             | 6967.10310   | 1331.72608   |         |

# Figure S96. HPLC of compound 7a

Data File C:\CHEM32\1\DATA\FARHEEN-07-01-2019-1 2019-01-07 10-25-48\041-0701.D  
 Sample Name: S-019-0008

```

=====
Acq. Operator   : Dr. Anil Kumar K.S.           Seq. Line :    7
Acq. Instrument : Instrument 1                  Location  : Vial 41
Injection Date  : 1/7/2019 11:36:01 AM         Inj       :    1
                                           Inj Volume: 5.000 µl

Method         : C:\CHEM32\1\DATA\FARHEEN-07-01-2019-1 2019-01-07 10-25-48\ACN-WATER-90-10.M
                (Sequence Method)
Last changed   : 12/12/2018 12:04:34 PM by Dr. Anil Kumar K.S.
Additional Info: Peak(s) manually integrated
  
```

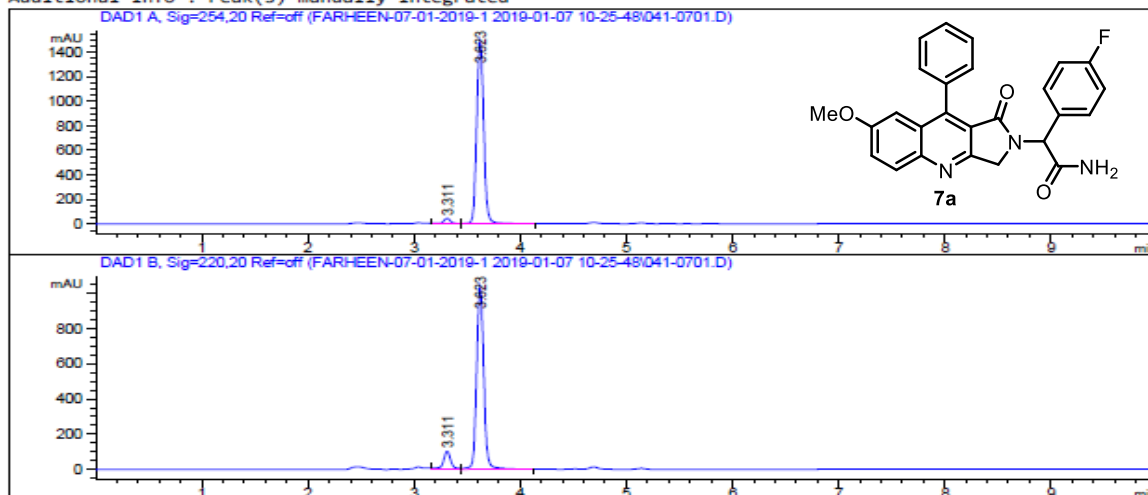

## Area Percent Report

```

Sorted By      : Signal
Multiplier     : 1.0000
Dilution      : 1.0000
Use Multiplier & Dilution Factor with ISTDs
  
```

Signal 1: DAD1 A, Sig=254,20 Ref=off

| Peak # | RetTime [min] | Type | Width [min] | Area [mAU*s] | Height [mAU] | Area %  |
|--------|---------------|------|-------------|--------------|--------------|---------|
| 1      | 3.311         | W    | 0.0736      | 228.13037    | 46.23408     | 3.2276  |
| 2      | 3.623         | VB   | 0.0714      | 6840.02051   | 1495.67200   | 96.7724 |

Totals : 7068.15088 1541.90608

# Figure S97. HPLC of compound 7b

Data File C:\CHEM32\1\DATA\FARHEEN-07-01-2019-1 2019-01-07 10-25-48\036-0201.D  
 Sample Name: S-019-0003

```

=====
Acq. Operator   : Dr. Anil Kumar K.S.           Seq. Line :    2
Acq. Instrument : Instrument 1                 Location  : Vial 36
Injection Date  : 1/7/2019 10:38:31 AM        Inj       :    1
                                                Inj Volume: 5.000 µl
Method         : C:\CHEM32\1\DATA\FARHEEN-07-01-2019-1 2019-01-07 10-25-48\ACN-WATER-90-10.M
                (Sequence Method)
Last changed   : 12/12/2018 12:04:34 PM by Dr. Anil Kumar K.S.
  
```

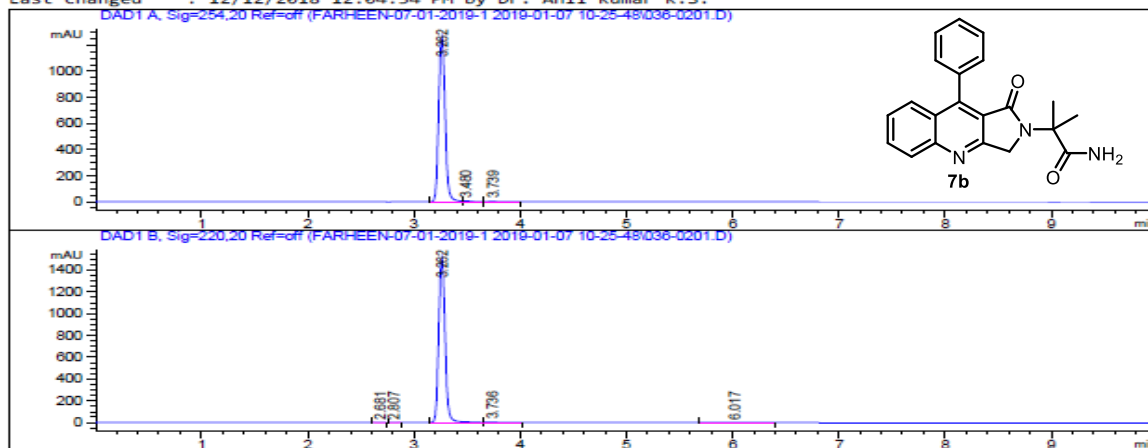

## Area Percent Report

```

=====
Sorted By      :      Signal
Multiplier     :      1.0000
Dilution      :      1.0000
Use Multiplier & Dilution Factor with ISTDs
  
```

Signal 1: DAD1 A, Sig=254,20 Ref=off

| Peak # | RetTime [min] | Type | Width [min] | Area [mAU*s] | Height [mAU] | Area %  |
|--------|---------------|------|-------------|--------------|--------------|---------|
| 1      | 3.262         | VV   | 0.0646      | 5270.99756   | 1264.93420   | 98.8703 |
| 2      | 3.480         | VV   | 0.0831      | 38.41008     | 6.67493      | 0.7205  |
| 3      | 3.739         | VB   | 0.0783      | 21.81442     | 4.08745      | 0.4092  |

Totals : 5331.22206 1275.69659

Instrument 1 1/7/2019 12:15:50 PM Dr. Anil Kumar K.S.

Page 1 of 2

Signal 2: DAD1 B, Sig=220,20 Ref=off

| Peak # | RetTime [min] | Type | Width [min] | Area [mAU*s] | Height [mAU] | Area %  |
|--------|---------------|------|-------------|--------------|--------------|---------|
| 1      | 2.681         | BB   | 0.0759      | 7.09305      | 1.42895      | 0.1128  |
| 2      | 2.807         | BB   | 0.0614      | 9.14099      | 2.34993      | 0.1453  |
| 3      | 3.262         | VV   | 0.0641      | 6240.91650   | 1513.67029   | 99.2294 |
| 4      | 3.736         | VB   | 0.0877      | 22.84978     | 3.82422      | 0.3633  |
| 5      | 6.017         | BB   | 0.1322      | 9.38072      | 1.03008      | 0.1492  |

Totals : 6289.38104 1522.30347

# Figure S98. HPLC of compound 7c

Data File C:\CHEM32\1\DATA\FARHEEN-07-01-2019-1 2019-01-07 10-25-48\037-0301.D  
 Sample Name: S-019-0004

```

=====
Acq. Operator   : Dr. Anil Kumar K.S.           Seq. Line :    3
Acq. Instrument : Instrument 1                 Location  : Vial 37
Injection Date  : 1/7/2019 10:50:01 AM        Inj       :    1
                                                Inj Volume: 5.000 µl
Method         : C:\CHEM32\1\DATA\FARHEEN-07-01-2019-1 2019-01-07 10-25-48\ACN-WATER-90-10.M
                (Sequence Method)
Last changed   : 12/12/2018 12:04:34 PM by Dr. Anil Kumar K.S.
  
```

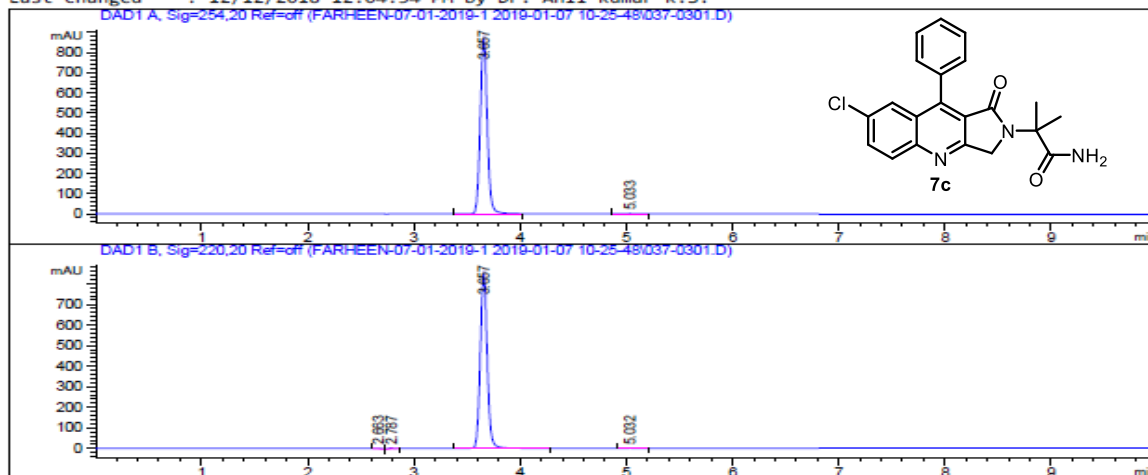

## Area Percent Report

```

Sorted By      : Signal
Multiplier     : 1.0000
Dilution       : 1.0000
Use Multiplier & Dilution Factor with ISTDs
  
```

Signal 1: DAD1 A, Sig=254,20 Ref=off

| Peak # | RetTime [min] | Type | Width [min] | Area [mAU*s] | Height [mAU] | Area %  |
|--------|---------------|------|-------------|--------------|--------------|---------|
| 1      | 3.657         | BB   | 0.0713      | 3970.32495   | 868.97247    | 99.8229 |
| 2      | 5.033         | BB   | 0.0909      | 7.04517      | 1.19238      | 0.1771  |

Totals : 3977.37012 870.16485

Instrument 1 1/7/2019 12:20:43 PM Dr. Anil Kumar K.S.

Page 1 of 2

Signal 2: DAD1 B, Sig=220,20 Ref=off

| Peak # | RetTime [min] | Type | Width [min] | Area [mAU*s] | Height [mAU] | Area %  |
|--------|---------------|------|-------------|--------------|--------------|---------|
| 1      | 2.663         | BB   | 0.0725      | 6.88353      | 1.47320      | 0.1762  |
| 2      | 2.787         | BB   | 0.0591      | 11.17208     | 3.02201      | 0.2860  |
| 3      | 3.657         | BB   | 0.0714      | 3881.49805   | 848.52203    | 99.3683 |
| 4      | 5.032         | BB   | 0.0893      | 6.61964      | 1.14768      | 0.1695  |

Totals : 3906.17330 854.16492

# Figure S99. HPLC of compound 8a

Data File C:\CHEM32\1\DATA\FARHEEN-07-01-2019-1 2019-01-07 10-25-48\035-0101.D  
 Sample Name: S-019-0002

```

=====
Acq. Operator   : Dr. Anil Kumar K.S.           Seq. Line :    1
Acq. Instrument : Instrument 1                   Location  : Vial 35
Injection Date  : 1/7/2019 10:26:59 AM          Inj       :    1
                                                    Inj Volume: 5.000 µl
Acq. Method    : C:\CHEM32\1\DATA\FARHEEN-07-01-2019-1 2019-01-07 10-25-48\ACN-WATER-90-10.M
Last changed   : 12/12/2018 12:04:34 PM by Dr. Anil Kumar K.S.
Analysis Method: C:\CHEM32\1\METHODS\ACN-WATER-90-10.M
Last changed   : 12/12/2018 12:04:34 PM by Dr. Anil Kumar K.S.
  
```

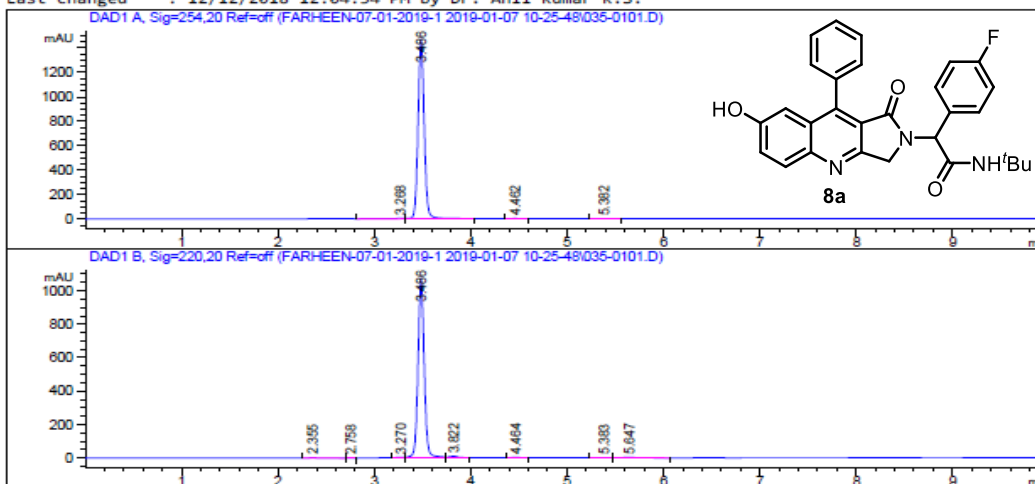

## Area Percent Report

```

Sorted By      : Signal
Multiplier     : 1.0000
Dilution       : 1.0000
Use Multiplier & Dilution Factor with ISTDs
  
```

Signal 1: DAD1 A, Sig=254,20 Ref=off

| Peak # | RetTime [min] | Type | Width [min] | Area [mAU*s] | Height [mAU] | Area %  |
|--------|---------------|------|-------------|--------------|--------------|---------|
| 1      | 3.268         | BV   | 0.1134      | 32.70513     | 3.91652      | 0.4948  |
| 2      | 3.486         | VB   | 0.0683      | 6547.66309   | 1461.54419   | 99.0623 |
| 3      | 4.462         | BB   | 0.1008      | 10.74677     | 1.67659      | 0.1626  |
| 4      | 5.382         | BV   | 0.1333      | 18.52433     | 2.17581      | 0.2803  |

Totals : 6609.63932 1469.31312

Signal 2: DAD1 B, Sig=220,20 Ref=off

| Peak # | RetTime [min] | Type | Width [min] | Area [mAU*s] | Height [mAU] | Area %  |
|--------|---------------|------|-------------|--------------|--------------|---------|
| 1      | 2.355         | BV   | 0.2264      | 33.66593     | 1.86660      | 0.6821  |
| 2      | 2.758         | VB   | 0.0712      | 11.41082     | 2.40979      | 0.2312  |
| 3      | 3.270         | BV   | 0.0695      | 11.36731     | 2.48075      | 0.2303  |
| 4      | 3.486         | WV   | 0.0683      | 4774.40039   | 1065.34521   | 96.7399 |
| 5      | 3.822         | VB   | 0.0875      | 41.48795     | 6.96486      | 0.8406  |
| 6      | 4.464         | BB   | 0.1034      | 9.85346      | 1.52455      | 0.1997  |
| 7      | 5.383         | BV   | 0.1298      | 16.62584     | 1.98339      | 0.3369  |
| 8      | 5.647         | VB   | 0.1320      | 36.48479     | 3.86806      | 0.7393  |

Totals : 4935.29649 1086.44322

# Figure S100. HPLC of compound 8b

Data File C:\CHEM32\1\DATA\FARHEEN-07-01-2019-1 2019-01-07 10-25-48\038-0401.D  
 Sample Name: S-019-0005

```

=====
Acq. Operator   : Dr. Anil Kumar K.S.           Seq. Line :    4
Acq. Instrument : Instrument 1                  Location  : Vial 38
Injection Date  : 1/7/2019 11:01:30 AM         Inj       :    1
                                                Inj Volume: 5.000 µl
Method         : C:\CHEM32\1\DATA\FARHEEN-07-01-2019-1 2019-01-07 10-25-48\ACN-WATER-90-10.M
                (Sequence Method)
Last changed   : 12/12/2018 12:04:34 PM by Dr. Anil Kumar K.S.
  
```

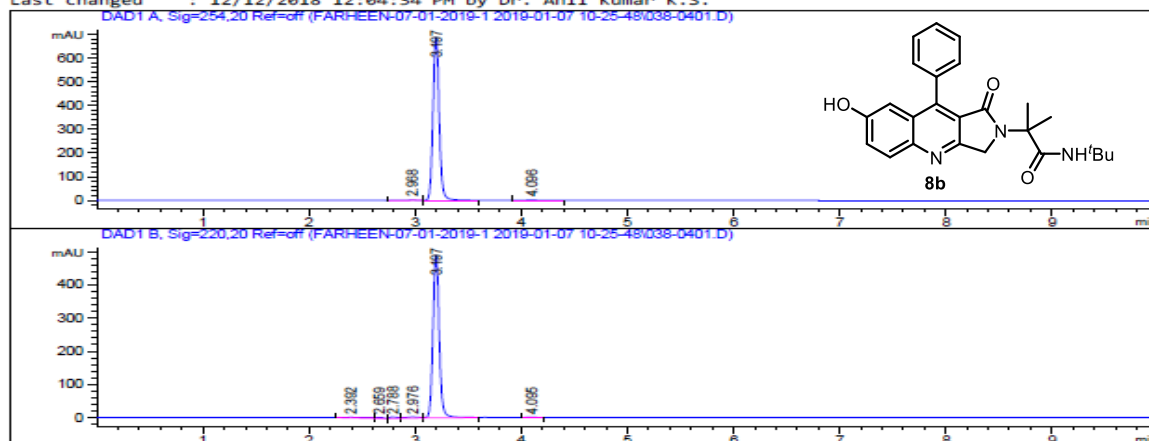

## Area Percent Report

```

=====
Sorted By      :      Signal
Multiplier     :      1.0000
Dilution       :      1.0000
Use Multiplier & Dilution Factor with ISTDs
  
```

Signal 1: DAD1 A, Sig=254,20 Ref=off

| Peak # | RetTime [min] | Type | Width [min] | Area [mAU*s] | Height [mAU] | Area %  |
|--------|---------------|------|-------------|--------------|--------------|---------|
| 1      | 2.968         | BV   | 0.1678      | 22.11630     | 1.69949      | 0.7762  |
| 2      | 3.197         | VV   | 0.0636      | 2818.83057   | 691.14648    | 98.9256 |
| 3      | 4.096         | BB   | 0.0796      | 8.49724      | 1.66354      | 0.2982  |

Totals :                                    2849.44410    694.50952

Instrument 1 1/7/2019 12:21:16 PM Dr. Anil Kumar K.S.

Page 1 of 2

Signal 2: DAD1 B, Sig=220,20 Ref=off

| Peak # | RetTime [min] | Type | Width [min] | Area [mAU*s] | Height [mAU] | Area %  |
|--------|---------------|------|-------------|--------------|--------------|---------|
| 1      | 2.392         | BV   | 0.2123      | 25.19151     | 1.48190      | 1.1881  |
| 2      | 2.659         | VB   | 0.0825      | 13.54921     | 2.53064      | 0.6390  |
| 3      | 2.788         | BV   | 0.0791      | 23.62584     | 4.36741      | 1.1142  |
| 4      | 2.976         | W    | 0.1197      | 34.83565     | 3.92096      | 1.6429  |
| 5      | 3.197         | VB   | 0.0638      | 2017.82727   | 492.11786    | 95.1629 |
| 6      | 4.095         | BB   | 0.0741      | 5.36289      | 1.15544      | 0.2529  |

Totals :                                    2120.39238    505.57421
